# Supplementary material for: Deep-Sequencing Analysis of the Mouse Transcriptome Response to Infection with Brucella melitensis Strains of Differing Virulence
Source: PLoS One. 2011 Dec 28;6(12):e28485. doi: 10.1371/journal.pone.0028485 (PMC3247208; doi:10.1371/journal.pone.0028485)
Supplement: Table S1 — Summary of gene expression annotation. (XLSX) [file pone.0028485.s004.xlsx]

## Sheet: Mc.GeneExpression
Gene	GeneExpression	TPM(Gene)	Symbol
11302	35	9.37	Aatk
11303	264	70.67	Abca1
11305	93	24.9	Abca2
11306	76	20.35	Abcb7
11307	485	129.84	Abcg1
11308	583	156.07	Abi1
11350	63	16.87	Abl1
11352	22	5.89	Abl2
11363	372	99.59	Acadl
11364	67	17.94	Acadm
11370	117	31.32	Acadvl
11409	99	26.5	Acads
11416	103	27.57	Slc33a1
11418	1	0.27	Accn1
11421	10	2.68	Ace
11423	1	0.27	Ache
11425	7	1.87	Apoc4
11426	591	158.21	Macf1
11428	11	2.94	Aco1
11429	374	100.12	Aco2
11430	464	124.21	Acox1
11431	11	2.94	Acp1
11433	279	74.69	Acp5
11459	6	1.61	Acta1
11461	7074	1893.72	Actb
11471	1	0.27	Actl7b
11475	14	3.75	Acta2
11477	45	12.05	Acvr1
11479	13	3.48	Acvr1b
11480	21	5.62	Acvr2a
11482	20	5.35	Acvrl1
11484	2	0.54	Aspa
11486	258	69.07	Ada
11487	653	174.81	Adam10
11489	4	1.07	Adam12
11490	1068	285.91	Adam15
11491	525	140.54	Adam17
11496	1	0.27	Adam22
11501	577	154.46	Adam8
11502	329	88.07	Adam9
11504	6	1.61	Adamts1
11512	4	1.07	Adcy6
11513	204	54.61	Adcy7
11515	36	9.64	Adcy9
11517	4	1.07	Adcyap1r1
11518	221	59.16	Add1
11520	1239	331.68	Plin2
11529	1	0.27	Adh7
11532	448	119.93	Adh5
11534	118	31.59	Adk
11538	166	44.44	Adnp
11539	1	0.27	Adora1
11540	14	3.75	Adora2a
11542	2	0.54	Adora3
11544	97	25.97	Adprh
11545	357	95.57	Parp1
11546	53	14.19	Parp2
11548	1	0.27	Adra1b
11555	10	2.68	Adrb2
11564	160	42.83	Adsl
11565	486	130.1	Adssl1
11566	134	35.87	Adss
11568	1	0.27	Aebp1
11569	129	34.53	Aebp2
11576	6	1.61	Afp
11593	230	61.57	Aga
11596	8	2.14	Ager
11600	1	0.27	Angpt1
11601	23	6.16	Angpt2
11603	157	42.03	Agrn
11605	318	85.13	Gla
11610	411	110.03	Agtrap
11622	6	1.61	Ahr
11624	55	14.72	Ahrr
11628	1	0.27	Aicda
11629	1783	477.31	Aif1
11630	120	32.12	Aim1
11632	78	20.88	Aip
11636	6	1.61	Ak1
11637	10	2.68	Ak2
11640	7	1.87	Akap1
11641	7	1.87	Akap2
11642	3	0.8	Akap3
11647	1	0.27	Alpl
11655	155	41.49	Alas1
11658	465	124.48	Alcam
11666	13	3.48	Abcd1
11669	1286	344.26	Aldh2
11671	82	21.95	Aldh3a2
11676	4	1.07	Aldoc
11677	438	117.25	Akr1b3
11687	109	29.18	Alox15
11689	37	9.9	Alox5
11690	231	61.84	Alox5ap
11692	93	24.9	Gfer
11698	3	0.8	Ambn
11699	2	0.54	Ambp
11705	2	0.54	Amh
11717	169	45.24	Ampd3
11722	2	0.54	Amy1
11727	21	5.62	Ang
11732	182	48.72	Ank
11735	10	2.68	Ank3
11736	366	97.98	Ankfy1
11737	202	54.08	Anp32a
11739	403	107.88	Slc25a4
11740	1392	372.64	Slc25a5
11744	1	0.27	Anxa11
11746	2968	794.54	Anxa4
11747	1136	304.11	Anxa5
11749	409	109.49	Anxa6
11750	367	98.25	Anxa7
11752	4	1.07	Anxa8
11757	117	31.32	Prdx3
11761	1	0.27	Aox1
11764	240	64.25	Ap1b1
11766	35	9.37	Ap1g2
11767	463	123.95	Ap1m1
11769	249	66.66	Ap1s1
11770	513	137.33	Fabp4
11771	114	30.52	Ap2a1
11772	170	45.51	Ap2a2
11773	824	220.59	Ap2m1
11774	419	112.17	Ap3b1
11776	962	257.53	Ap3d1
11778	21	5.62	Ap3s2
11781	2	0.54	Ap4m1
11782	291	77.9	Ap4s1
11783	268	71.74	Apaf1
11784	1	0.27	Apba2
11785	2	0.54	Apbb1
11787	7	1.87	Apbb2
11792	42	11.24	Apex1
11793	240	64.25	Atg5
11796	100	26.77	Birc3
11797	13	3.48	Birc2
11798	208	55.68	Xiap
11799	43	11.51	Birc5
11800	252	67.46	Api5
11801	34	9.1	Cd5l
11803	6	1.61	Aplp1
11804	678	181.5	Aplp2
11810	726	194.35	Apobec1
11812	93	24.9	Apoc1
11813	480	128.5	Apoc2
11816	41031	10984.1	Apoe
11819	1	0.27	Nr2f2
11820	1706	456.7	App
11821	586	156.87	Aprt
11834	109	29.18	Aqr
11836	262	70.14	Araf
11837	23	6.16	Rplp0
11840	1	0.27	Arf1
11841	509	136.26	Arf2
11842	572	153.13	Arf3
11843	1095	293.13	Arf4
11844	18	4.82	Arf5
11845	1942	519.88	Arf6
11846	1101	294.74	Arg1
11847	2819	754.65	Arg2
11848	1	0.27	Rhoa
11852	600	160.62	Rhob
11853	546	146.17	Rhoc
11854	5	1.34	Rhod
11855	2	0.54	Arhgap5
11856	51	13.65	Arhgap6
11857	413	110.56	Arhgdib
11861	28	7.5	Arl4a
11863	233	62.37	Arnt
11865	16	4.28	Arntl
11867	4099	1097.31	Arpc1b
11877	14	3.75	Arvcf
11881	760	203.45	Arsb
11886	953	255.12	Asah1
11890	1	0.27	Asgr2
11891	16	4.28	Rab27a
11898	33	8.83	Ass1
11905	1	0.27	Serpinc1
11906	96	25.7	Zfhx3
11907	72	19.27	Ate1
11909	196	52.47	Atf2
11910	242	64.78	Atf3
11911	407	108.95	Atf4
11920	15	4.02	Atm
11927	2361	632.04	Atox1
11928	762	203.99	Atp1a1
11933	530	141.88	Atp1b3
11936	11	2.94	Fxyd2
11938	295	78.97	Atp2a2
11946	1606	429.93	Atp5a1
11947	2163	579.04	Atp5b
11949	896	239.86	Atp5c1
11958	510	136.53	Atp5k
11964	1861	498.19	Atp6v1a
11966	891	238.52	Atp6v1b2
11972	899	240.66	Atp6v0d1
11973	667	178.56	Atp6v1e1
11974	1129	302.24	Atp6v0e
11975	524	140.28	Atp6v0a1
11977	228	61.04	Atp7a
11980	113	30.25	Atp8a1
11981	6	1.61	Atp9a
11982	33	8.83	Atp10a
11983	799	213.89	Atpif1
11987	32	8.57	Slc7a1
11988	292	78.17	Slc7a2
11990	135	36.14	Atrn
11991	541	144.83	Hnrnpd
11992	156	41.76	Auh
11993	400	107.08	Aup1
12006	4	1.07	Axin2
12010	222	59.43	B2m
12013	276	73.89	Bach1
12014	6	1.61	Bach2
12018	183	48.99	Bak1
12028	177	47.38	Bax
12033	152	40.69	Bcap29
12034	498	133.32	Phb2
12035	5	1.34	Bcat1
12036	87	23.29	Bcat2
12039	170	45.51	Bckdha
12041	94	25.16	Bckdk
12042	238	63.71	Bcl10
12043	28	7.5	Bcl2
12048	138	36.94	Bcl2l1
12050	24	6.42	Bcl2l2
12051	54	14.46	Bcl3
12053	197	52.74	Bcl6
12054	75	20.08	Bcl7b
12055	35	9.37	Bcl7c
12068	134	35.87	Bet1
12070	148	39.62	Ngfrap1
12091	187	50.06	Glb1
12095	33	8.83	Bglap-rs1
12111	3	0.8	Bgn
12121	1	0.27	Bicd1
12122	55	14.72	Bid
12125	248	66.39	Bcl2l11
12140	1555	416.28	Fabp7
12142	7	1.87	Prdm1
12144	22	5.89	Blm
12151	42	11.24	Bmi1
12156	23	6.16	Bmp2
12162	96	25.7	Bmp7
12166	8	2.14	Bmpr1a
12168	5	1.34	Bmpr2
12169	1	0.27	Bmx
12173	1	0.27	Bnc1
12175	1586	424.58	Bnip2
12177	773	206.93	Bnip3l
12181	35	9.37	Bop1
12182	353	94.5	Bst1
12183	17	4.55	Bpgm
12189	3	0.8	Brca1
12190	3	0.8	Brca2
12192	387	103.6	Zfp36l1
12193	526	140.81	Zfp36l2
12211	256	68.53	Birc6
12215	355	95.03	Bsg
12217	1	0.27	Bsn
12223	10	2.68	Btc
12226	16	4.28	Btg1
12227	34	9.1	Btg2
12229	63	16.87	Btk
12234	16	4.28	Btrc
12235	5	1.34	Bub1
12236	12	3.21	Bub1b
12237	289	77.37	Bub3
12238	454	121.54	Commd3
12257	5152	1379.2	Tspo
12258	3	0.8	Serping1
12259	771	206.4	C1qa
12260	770	206.13	C1qb
12261	227	60.77	C1qbp
12262	76	20.35	C1qc
12263	35	9.37	C2
12265	8	2.14	Ciita
12267	5321	1424.44	C3ar1
12282	55	14.72	Hyou1
12283	546	146.17	Cab39
12286	79	21.15	Cacna1a
12289	47	12.58	Cacna1d
12293	1	0.27	Cacna2d1
12295	11	2.94	Cacnb1
12297	9	2.41	Cacnb3
12298	6	1.61	Cacnb4
12301	453	121.27	Cacybp
12304	118	31.59	Pdia4
12305	4	1.07	Ddr1
12306	1934	517.74	Anxa2
12313	2885	772.32	Calm1
12314	3160	845.94	Calm2
12315	463	123.95	Calm3
12316	2	0.54	Aspm
12317	1759	470.89	Calr
12321	220	58.89	Calu
12326	1	0.27	Camk4
12328	45	12.05	Caml
12330	2658	711.55	Canx
12331	1634	437.43	Cap1
12332	2321	621.34	Capg
12333	66	17.67	Capn1
12334	353	94.5	Capn2
12336	777	208	Capns1
12337	19	5.09	Capn5
12339	115	30.79	Capn7
12343	965	258.33	Capza2
12345	1212	324.45	Capzb
12349	11	2.94	Car2
12351	10	2.68	Car4
12352	14	3.75	Car5a
12359	48	12.85	Cat
12361	63	16.87	Cask
12366	38	10.17	Casp2
12367	8	2.14	Casp3
12368	55	14.72	Casp6
12369	24	6.42	Casp7
12370	538	144.02	Casp8
12371	99	26.5	Casp9
12373	187	50.06	Casq2
12380	162	43.37	Cast
12385	294	78.7	Ctnna1
12387	923	247.09	Ctnnb1
12388	135	36.14	Ctnnd1
12389	74	19.81	Cav1
12390	125	33.46	Cav2
12393	5	1.34	Runx2
12394	180	48.19	Runx1
12396	19	5.09	Cbfa2t2
12398	36	9.64	Cbfa2t3
12399	21	5.62	Runx3
12400	209	55.95	Cbfb
12406	16	4.28	Serpinh1
12408	73	19.54	Cbr1
12409	887	237.45	Cbr2
12416	2	0.54	Cbx2
12417	1	0.27	Cbx3
12418	72	19.27	Cbx4
12419	35	9.37	Cbx5
12421	82	21.95	Rb1cc1
12428	42	11.24	Ccna2
12442	8	2.14	Ccnb2
12443	35	9.37	Ccnd1
12444	8	2.14	Ccnd2
12445	226	60.5	Ccnd3
12447	10	2.68	Ccne1
12448	4	1.07	Ccne2
12449	6	1.61	Ccnf
12450	89	23.83	Ccng1
12452	54	14.46	Ccng2
12453	369	98.78	Ccni
12454	1	0.27	Ccnk
12460	99	26.5	Ccs
12461	524	140.28	Cct2
12462	191	51.13	Cct3
12464	129	34.53	Cct4
12465	451	120.73	Cct5
12466	240	64.25	Cct6a
12468	178	47.65	Cct7
12469	447	119.66	Cct8
12475	237	63.45	Cd14
12476	295	78.97	Cd151
12478	3	0.8	Cd19
12481	13	3.48	Cd2
12483	12	3.21	Cd22
12484	368	98.51	Cd24a
12488	96	25.7	Cd2ap
12489	74	19.81	Cd33
12490	4	1.07	Cd34
12491	2024	541.83	Cd36
12492	1063	284.57	Scarb2
12493	1058	283.23	Cd37
12494	71	19.01	Cd38
12495	341	91.29	Entpd1
12496	1	0.27	Entpd2
12497	30	8.03	Entpd6
12499	38	10.17	Entpd5
12501	1	0.27	Cd3e
12504	5	1.34	Cd4
12506	1145	306.52	Cd48
12507	1	0.27	Cd5
12508	1958	524.16	Cd53
12509	8	2.14	Cd59a
12512	3787	1013.79	Cd63
12514	35	9.37	Cd68
12515	12	3.21	Cd69
12517	44	11.78	Cd72
12519	8	2.14	Cd80
12520	8	2.14	Cd81
12521	64	17.13	Cd82
12522	2	0.54	Cd83
12523	1555	416.28	Cd84
12524	180	48.19	Cd86
12527	457	122.34	Cd9
12530	6	1.61	Cdc25a
12531	26	6.96	Cdc25b
12532	7	1.87	Cdc25c
12534	49	13.12	Cdc2a
12537	58	15.53	Cdc2l1
12539	144	38.55	Cdc37
12540	1966	526.3	Cdc42
12544	10	2.68	Cdc45l
12545	17	4.55	Cdc7
12549	95	25.43	Cdgap
12552	8	2.14	Cdh11
12562	7	1.87	Cdh5
12566	76	20.35	Cdk2
12568	47	12.58	Cdk5
12569	15	4.02	Cdk5r1
12571	5	1.34	Cdk6
12572	48	12.85	Cdk7
12575	22	5.89	Cdkn1a
12576	62	16.6	Cdkn1b
12577	5	1.34	Cdkn1c
12578	20	5.35	Cdkn2a
12579	3	0.8	Cdkn2b
12580	5	1.34	Cdkn2c
12583	8	2.14	Cdo1
12585	10	2.68	Cdr2
12587	1	0.27	Mia1
12589	6	1.61	Ift81
12593	29	7.76	Cdyl
12606	3829	1025.03	Cebpa
12607	61	16.33	Cebpz
12608	236	63.18	Cebpb
12609	65	17.4	Cebpd
12611	355	95.03	Cebpg
12615	55	14.72	Cenpa
12616	361	96.64	Cenpb
12617	17	4.55	Cenpc1
12626	323	86.47	Cetn3
12628	4	1.07	Cfh
12632	16	4.28	Cfl2
12633	120	32.12	Cflar
12642	36	9.64	Ch25h
12648	107	28.64	Chd1
12652	3	0.8	Chga
12654	4	1.07	Chi3l1
12655	3130	837.91	Chi3l3
12660	37	9.9	Chka
12663	35	9.37	Chml
12669	2	0.54	Chrm1
12675	70	18.74	Chuk
12684	2	0.54	Cideb
12696	86	23.02	Cirbp
12700	1	0.27	Cish
12702	67	17.94	Socs3
12703	11	2.94	Socs1
12709	1	0.27	Ckb
12715	3	0.8	Ckm
12721	746	199.71	Coro1a
12724	2	0.54	Clcn2
12725	74	19.81	Clcn3
12727	53	14.19	Clcn4-2
12729	149	39.89	Clns1a
12737	2	0.54	Cldn1
12747	369	98.78	Clk1
12748	7	1.87	Clk2
12750	237	63.45	Clk4
12751	727	194.62	Tpp1
12752	7	1.87	Cln3
12753	19	5.09	Clock
12757	1322	353.9	Clta
12763	4	1.07	Cmah
12764	292	78.17	Cmas
12765	3	0.8	Il8rb
12766	8	2.14	Cxcr3
12767	1205	322.58	Cxcr4
12768	483	129.3	Ccr1
12769	2	0.54	Ccr9
12771	5	1.34	Ccr3
12772	462	123.68	Ccr2
12774	1885	504.62	Ccr5
12775	21	5.62	Ccr7
12778	1	0.27	Cxcr7
12785	463	123.95	Cnbp
12789	1	0.27	Cnga2
12793	204	54.61	Cnih
12795	29	7.76	Plk3
12798	79	21.15	Cnn2
12799	22	5.89	Cnp
12802	6	1.61	Cnr2
12807	70	18.74	Hps3
12812	21	5.62	Coil
12815	1	0.27	Col11a2
12819	4	1.07	Col15a1
12821	1	0.27	Col17a1
12822	8	2.14	Col18a1
12823	4	1.07	Col19a1
12825	45	12.05	Col3a1
12826	7	1.87	Col4a1
12827	14	3.75	Col4a2
12831	5	1.34	Col5a1
12832	4	1.07	Col5a2
12833	5	1.34	Col6a1
12834	9	2.41	Col6a2
12837	329	88.07	Col8a1
12841	9	2.41	Col9a3
12842	97	25.97	Col1a1
12843	35	9.37	Col1a2
12845	7	1.87	Comp
12846	68	18.2	Comt1
12847	291	77.9	Copa
12848	158	42.3	Cops2
12850	23	6.16	Coq7
12857	1984	531.12	Cox4i1
12858	1108	296.61	Cox5a
12861	149	39.89	Cox6a1
12862	3	0.8	Cox6a2
12864	1133	303.31	Cox6c
12865	18	4.82	Cox7a1
12868	1196	320.17	Cox8a
12870	68	18.2	Cp
12877	6	1.61	Cpeb1
12892	106	28.38	Cpox
12894	689	184.45	Cpt1a
12896	88	23.56	Cpt2
12905	13	3.48	Cradd
12908	548	146.7	Crat
12909	121	32.39	Crcp
12912	70	18.74	Creb1
12913	162	43.37	Creb3
12914	8	2.14	Crebbp
12915	205	54.88	Atf6b
12916	25	6.69	Crem
12925	3788	1014.06	Crip1
12927	8	2.14	Bcar1
12928	237	63.45	Crk
12929	9	2.41	Crkl
12934	230	61.57	Dpysl2
12945	823	220.32	Dmbt1
12946	143	38.28	Cr1l
12952	37	9.9	Cry1
12953	13	3.48	Cry2
12954	22	5.89	Cryaa
12955	32	8.57	Cryab
12960	1	0.27	Crybb1
12971	2	0.54	Crym
12972	18	4.82	Cryz
12974	400	107.08	Cs
12977	26	6.96	Csf1
12978	2570	687.99	Csf1r
12982	1692	452.95	Csf2ra
12983	1203	322.05	Csf2rb
12984	498	133.32	Csf2rb2
12985	7	1.87	Csf3
12986	24	6.42	Csf3r
12988	772	206.67	Csk
12994	2	0.54	Csn3
12995	140	37.48	Csnk2a1
13000	79	21.15	Csnk2a2
13001	218	58.36	Csnk2b
13002	112	29.98	Dnajc5
13003	89	23.83	Vcan
13006	86	23.02	Smc3
13007	724	193.82	Csrp1
13008	14	3.75	Csrp2
13010	11177	2992.11	Cst3
13011	1	0.27	Cst7
13014	2659	711.82	Cstb
13017	3	0.8	Ctbp2
13018	160	42.83	Ctcf
13024	157	42.03	Ctla2a
13025	557	149.11	Ctla2b
13026	80	21.42	Pcyt1a
13030	23499	6290.73	Ctsb
13032	3209	859.06	Ctsc
13033	25499	6826.14	Ctsd
13034	99	26.5	Ctse
13036	2132	570.74	Ctsh
13038	266	71.21	Ctsk
13039	30582	8186.87	Ctsl
13040	34929	9350.57	Ctss
13041	2	0.54	Ctsw
13043	3	0.8	Cttn
13046	25	6.69	Cugbp1
13047	101	27.04	Cux1
13051	1	0.27	Cx3cr1
13052	2	0.54	Cxadr
13057	1567	419.49	Cyba
13058	3526	943.92	Cybb
13063	5	1.34	Cycs
13070	4	1.07	Cyp11a1
13076	3	0.8	Cyp1a1
13078	62	16.6	Cyp1b1
13079	1	0.27	Cyp21a1
13082	3	0.8	Cyp26a1
13110	3	0.8	Cyp2j6
13113	1	0.27	Cyp3a13
13121	72	19.27	Cyp51
13123	1	0.27	Cyp7b1
13132	1566	419.22	Dab2
13134	10	2.68	Dach1
13135	456	122.07	Dad1
13136	10	2.68	Cd55
13138	14	3.75	Dag1
13139	25	6.69	Dgka
13144	86	23.02	Dapk3
13163	443	118.59	Daxx
13169	375	100.39	Dbnl
13170	87	23.29	Dbp
13171	31	8.3	Dbt
13175	3	0.8	Dclk1
13177	60	16.06	Dci
13178	483	129.3	Dck
13179	14	3.75	Dcn
13185	131	35.07	Dscr3
13191	170	45.51	Dctn1
13194	184	49.26	Ddb1
13197	11	2.94	Gadd45a
13198	157	42.03	Ddit3
13200	359	96.11	Ddost
13202	100	26.77	Ddt
13204	348	93.16	Dhx15
13205	5	1.34	Ddx3x
13206	8	2.14	Ddx4
13207	8337	2231.83	Ddx5
13209	739	197.83	Ddx6
13211	360	96.37	Dhx9
13214	312	83.52	Defb1
13244	954	255.39	Degs1
13340	2	0.54	Slc29a2
13345	1	0.27	Twist2
13346	5	1.34	Des
13347	1	0.27	Dffa
13349	1	0.27	Darc
13350	24	6.42	Dgat1
13353	2	0.54	Dgcr6
13356	88	23.56	Dgcr2
13358	109	29.18	Slc25a1
13360	48	12.85	Dhcr7
13361	61	16.33	Dhfr
13367	30	8.03	Diap1
13368	27	7.23	Dffb
13371	8	2.14	Dio2
13382	201	53.81	Dld
13385	4	1.07	Dlg4
13386	5	1.34	Dlk1
13388	2	0.54	Dll1
13400	1	0.27	Dmpk
13401	4	1.07	Dmwd
13404	1	0.27	Dmc1
13405	4	1.07	Dmd
13418	18	4.82	Dnajc1
13421	3	0.8	Dnase1l3
13423	34	9.1	Dnase2a
13424	19	5.09	Dync1h1
13427	698	186.86	Dync1i2
13429	79	21.15	Dnm1
13430	290	77.63	Dnm2
13433	123	32.93	Dnmt1
13434	38	10.17	Trdmt1
13435	553	148.04	Dnmt3a
13436	5	1.34	Dnmt3b
13437	76	20.35	Dnpep
13446	4	1.07	Doc2a
13448	172	46.04	Dok1
13449	99	26.5	Dok2
13476	439	117.52	Reep5
13478	249	66.66	Dpagt1
13479	1	0.27	Dpep1
13480	243	65.05	Dpm1
13481	189	50.6	Dpm2
13482	7	1.87	Dpp4
13486	124	33.2	Dr1
13494	43	11.51	Drg1
13495	63	16.87	Drg2
13496	112	29.98	Arid3a
13498	6	1.61	Atn1
13511	2	0.54	Dsg2
13521	18	4.82	Slc26a2
13528	20	5.35	Dtnb
13537	9	2.41	Dusp2
13542	56	14.99	Dvl1
13543	66	17.67	Dvl2
13544	5	1.34	Dvl3
13548	240	64.25	Dyrk1a
13549	16	4.28	Dyrk1b
13555	48	12.85	E2f1
13557	43	11.51	E2f3
13559	23	6.16	E2f5
13560	16	4.28	E4f1
13589	265	70.94	Mapre1
13590	2	0.54	Lefty1
13595	148	39.62	Ebp
13601	1126	301.43	Ecm1
13603	12	3.21	Opn3
13612	13	3.48	Edil3
13614	3	0.8	Edn1
13617	1	0.27	Ednra
13618	48	12.85	Ednrb
13619	16	4.28	Phc1
13626	116	31.05	Eed
13629	307	82.18	Eef2
13631	15	4.02	Eef2k
13636	3	0.8	Efna1
13637	3	0.8	Efna2
13639	3	0.8	Efna4
13640	2	0.54	Efna5
13641	4	1.07	Efnb1
13642	32	8.57	Efnb2
13645	1	0.27	Egf
13649	6	1.61	Egfr
13650	5	1.34	Rhbdf1
13653	115	30.79	Egr1
13654	77	20.61	Egr2
13660	189	50.6	Ehd1
13663	392	104.94	Ei24
13664	377	100.92	Eif1a
13665	7	1.87	Eif2s1
13666	1	0.27	Eif2ak3
13667	60	16.06	Eif2b4
13669	413	110.56	Eif3a
13680	78	20.88	Ddx19a
13681	1753	469.28	Eif4a1
13682	34	9.1	Eif4a2
13685	504	134.92	Eif4ebp1
13688	22	5.89	Eif4ebp2
13690	558	149.38	Eif4g2
13709	15	4.02	Elf1
13712	27	7.23	Elk1
13713	148	39.62	Elk3
13714	4	1.07	Elk4
13716	89	23.83	Ell
13722	228	61.04	Aimp1
13723	890	238.25	Emb
13726	5	1.34	Emd
13728	155	41.49	Mark2
13730	2912	779.55	Emp1
13731	14	3.75	Emp2
13732	1131	302.77	Emp3
13733	1340	358.72	Emr1
13797	1	0.27	Emx2
13803	131	35.07	Enc1
13804	9	2.41	Endog
13805	5	1.34	Eng
13807	63	16.87	Eno2
13808	13	3.48	Eno3
13819	201	53.81	Epas1
13821	210	56.22	Epb4.1l1
13822	641	171.6	Epb4.1l2
13823	9	2.41	Epb4.1l3
13824	1	0.27	Epb4.1l4a
13830	400	107.08	Stom
13831	106	28.38	Epc1
13836	2	0.54	Epha2
13838	2	0.54	Epha4
13845	1	0.27	Ephb3
13849	53	14.19	Ephx1
13850	1	0.27	Ephx2
13852	71	19.01	Stx2
13854	166	44.44	Epn1
13855	2	0.54	Epn2
13857	4	1.07	Epor
13858	232	62.11	Eps15
13859	136	36.41	Eps15l1
13860	65	17.4	Eps8
13864	255	68.26	Nr2f6
13867	2	0.54	Erbb3
13870	31	8.3	Ercc1
13871	168	44.97	Ercc2
13872	92	24.63	Ercc3
13874	7	1.87	Ereg
13875	78	20.88	Erf
13885	2286	611.97	Esd
13929	33	8.83	Amz2
13982	1	0.27	Esr1
13983	2	0.54	Esr2
13990	12	3.21	Smarcad1
13992	1	0.27	Khdrbs3
13998	118	31.59	Fgd6
14000	1	0.27	Rnasen
14007	482	129.03	Cugbp2
14009	1	0.27	Etv1
14011	99	26.5	Etv6
14012	8	2.14	Mpzl2
14017	609	163.03	Evi2a
14020	209	55.95	Evi5
14030	253	67.73	Ewsr1
14038	13	3.48	Expi
14042	36	9.64	Ext1
14043	152	40.69	Ext2
14050	71	19.01	Eya3
14051	4	1.07	Eya4
14055	33	8.83	Ezh1
14056	28	7.5	Ezh2
14057	218	58.36	Sfxn1
14058	481	128.76	F10
14064	1	0.27	F2rl2
14066	7	1.87	F3
14067	65	17.4	F5
14068	21	5.62	F7
14070	58	15.53	F8a
14073	1	0.27	Faah
14077	5	1.34	Fabp3
14081	115	30.79	Acsl1
14082	82	21.95	Fadd
14083	34	9.1	Ptk2
14084	84	22.49	Faf1
14085	27	7.23	Fah
14086	18	4.82	Fscn1
14087	73	19.54	Fanca
14088	3	0.8	Fancc
14089	1	0.27	Fap
14102	29	7.76	Fas
14104	31	8.3	Fasn
14105	59	15.79	Sfrs13a
14107	1	0.27	Fat1
14115	19	5.09	Fbln2
14118	7	1.87	Fbn1
14121	3	0.8	Fbp1
14123	134	35.87	Fbrs
14125	2	0.54	Fcer1a
14127	4635	1240.8	Fcer1g
14129	3024	809.53	Fcgr1
14130	2441	653.46	Fcgr2b
14131	2900	776.34	Fcgr3
14132	1038	277.87	Fcgrt
14133	242	64.78	Fcna
14137	60	16.06	Fdft1
14148	75	20.08	Fdx1
14151	198	53.01	Fech
14154	80	21.42	Fem1a
14155	266	71.21	Fem1b
14156	54	14.46	Fen1
14158	14	3.75	Fert2
14159	304	81.38	Fes
14168	1	0.27	Fgf13
14176	1	0.27	Fgf5
14178	2	0.54	Fgf7
14180	3	0.8	Fgf9
14182	33	8.83	Fgfr1
14184	7	1.87	Fgfr3
14187	197	52.74	Akr1b8
14190	147	39.35	Fgl2
14191	92	24.63	Fgr
14194	31	8.3	Fh1
14208	99	26.5	Ppm1g
14211	2	0.54	Smc2
14218	9	2.41	Sh3pxd2a
14219	19	5.09	Ctgf
14225	192	51.4	Fkbp1a
14226	87	23.29	Fkbp1b
14227	258	69.07	Fkbp2
14228	96	25.7	Fkbp4
14229	11	2.94	Fkbp5
14230	2	0.54	Fkbp10
14231	3	0.8	Fkbp7
14232	913	244.41	Fkbp8
14235	5	1.34	Foxm1
14236	121	32.39	Foxn2
14245	11	2.94	Lpin1
14247	284	76.03	Fli1
14248	690	184.71	Flii
14251	252	67.46	Flot1
14252	201	53.81	Flot2
14254	1	0.27	Flt1
14255	1	0.27	Flt3
14256	50	13.39	Flt3l
14257	3	0.8	Flt4
14260	25	6.69	Fmn1
14265	150	40.16	Fmr1
14268	5340	1429.53	Fn1
14270	203	54.34	Srgap2
14275	2	0.54	Folr1
14276	1024	274.13	Folr2
14281	834	223.26	Fos
14283	5	1.34	Fosl1
14284	1	0.27	Fosl2
14287	6	1.61	Fpgs
14289	91	24.36	Fpr2
14293	48	12.85	Fpr1
14296	10	2.68	Frat1
14297	16	4.28	Fxn
14299	3	0.8	Freq
14300	188	50.33	Frg1
14302	2	0.54	Frk
14313	1	0.27	Fst
14314	24	6.42	Fstl1
14319	47575	12735.9	Fth1
14339	66	17.67	Aktip
14356	98	26.23	Fxc1
14359	110	29.45	Fxr1
14360	31	8.3	Fyn
14362	32	8.57	Fzd1
14365	2	0.54	Fzd3
14366	2	0.54	Fzd4
14367	9	2.41	Fzd5
14369	244	65.32	Fzd7
14370	10	2.68	Fzd8
14375	58	15.53	Xrcc6
14376	144	38.55	Ganab
14381	259	69.33	G6pdx
14385	33	8.83	Slc37a4
14387	399	106.81	Gaa
14388	30	8.03	Gab1
14389	130	34.8	Gab2
14390	97	25.97	Gabpa
14391	29	7.76	Gabpb1
14419	4	1.07	Gal
14420	374	100.12	Galc
14421	117	31.32	B4galnt1
14422	6	1.61	B4galnt2
14423	285	76.3	Galnt1
14425	1	0.27	Galnt3
14426	137	36.68	Galnt4
14430	41	10.98	Galt
14431	32	8.57	Gamt
14450	48	12.85	Gart
14453	3	0.8	Gas2
14455	68	18.2	Gas5
14456	167	44.71	Gas6
14457	139	37.21	Gas7
14461	4	1.07	Gata2
14462	1	0.27	Gata3
14465	1	0.27	Gata6
14466	1395	373.44	Gba
14467	227	60.77	Gbas
14468	53	14.19	Gbp1
14469	97	25.97	Gbp2
14470	429	114.84	Rabac1
14479	97	25.97	Usp15
14489	1087	290.99	Mtpn
14528	169	45.24	Gch1
14533	351	93.96	Bloc1s1
14534	35	9.37	Kat2a
14536	11	2.94	Nr6a1
14537	225	60.23	Gcnt1
14538	10	2.68	Gcnt2
14544	237	63.45	Gda
14547	79	21.15	Gdap2
14548	138	36.94	Mrps33
14555	2	0.54	Gpd1
14562	18	4.82	Gdf3
14566	12	3.21	Gdf9
14567	183	48.99	Gdi1
14569	792	212.02	Gdi2
14570	2	0.54	Arhgdig
14571	71	19.01	Gpd2
14579	3	0.8	Gem
14581	1	0.27	Gfi1
14583	39	10.44	Gfpt1
14584	2	0.54	Gfpt2
14586	1	0.27	Gfra2
14590	420	112.43	Ggh
14593	4	1.07	Ggps1
14594	74	19.81	Ggta1
14595	545	145.9	B4galt1
14601	1	0.27	Ghrh
14605	255	68.26	Tsc22d3
14609	11	2.94	Gja1
14615	2	0.54	Gjc1
14618	1	0.27	Gjb1
14620	5	1.34	Gjb3
14621	1	0.27	Gjb4
14622	1	0.27	Gjb5
14628	382	102.26	Ostm1
14629	5	1.34	Gclc
14630	99	26.5	Gclm
14634	1	0.27	Gli3
14635	48	12.85	Galk1
14645	446	119.4	Glul
14651	1	0.27	Hagh
14659	6	1.61	Glrp1
14660	191	51.13	Gls
14661	1017	272.25	Glud1
14667	1550	414.94	Gm2a
14670	66	17.67	Gnal1
14672	26	6.96	Gna11
14673	3	0.8	Gna12
14674	479	128.23	Gna13
14676	71	19.01	Gna15
14677	1	0.27	Gnai1
14679	158	42.3	Gnai3
14680	12	3.21	Gnal
14682	170	45.51	Gnaq
14683	856	229.15	Gnas
14688	233	62.37	Gnb1
14693	1434	383.88	Gnb2
14694	3239	867.09	Gnb2l1
14696	8	2.14	Gnb4
14697	2	0.54	Gnb5
14700	188	50.33	Gng10
14702	482	129.03	Gng2
14705	76	20.35	Bscl2
14708	3	0.8	Gng7
14711	2	0.54	Gnmt
14712	82	21.95	Gnpat
14714	1	0.27	Gnrh1
14719	172	46.04	Got2
14726	642	171.86	Pdpn
14727	1	0.27	Gp49a
14728	2872	768.84	Lilrb4
14731	87	23.29	Gpaa1
14733	85	22.75	Gpc1
14734	3	0.8	Gpc3
14739	159	42.56	S1pr2
14744	214	57.29	Gpr65
14745	3	0.8	Lpar1
14747	334	89.41	Cmklr1
14751	730	195.42	Gpi1
14755	5	1.34	Pigq
14766	66	17.67	Gpr56
14768	35	9.37	Lancl1
14772	4	1.07	Grk4
14773	25	6.69	Grk5
14775	2911	779.28	Gpx1
14778	100	26.77	Gpx3
14780	12	3.21	Gpx5
14784	884	236.65	Grb2
14788	16	4.28	Gpr162
14790	527	141.08	Grcc10
14791	108	28.91	Emg1
14792	244	65.32	Lpcat3
14793	8	2.14	Cdca3
14794	356	95.3	Spsb2
14797	257	68.8	Aes
14809	8	2.14	Grik5
14813	1	0.27	Grin2c
14815	142	38.01	Nr3c1
14824	17113	4581.19	Grn
14825	31	8.3	Cxcl1
14827	1389	371.84	Pdia3
14828	4266	1142.02	Hspa5
14841	8	2.14	Gsg2
14852	428	114.58	Gspt1
14853	6	1.61	Gspt2
14854	30	8.03	Gss
14859	14	3.75	Gsta3
14862	449	120.2	Gstm1
14865	15	4.02	Gstm4
14866	14	3.75	Gstm5
14871	1	0.27	Gstt1
14872	66	17.67	Gstt2
14873	449	120.2	Gsto1
14874	51	13.65	Gstz1
14884	99	26.5	Gtf2h1
14885	46	12.31	Gtf2h4
14886	5	1.34	Gtf2i
14894	128	34.27	Gtl3
14897	346	92.62	Trip12
14904	94	25.16	Gtpbp1
14910	32	8.57	Gt(ROSA)26Sor
14911	64	17.13	Thumpd3
14912	1	0.27	Nkx6-2
14913	88	23.56	Guca1a
14923	83	22.22	Guk1
14924	1	0.27	Magi1
14933	45	12.05	Gyk
14936	17	4.55	Gys1
14950	580	155.27	H13
14957	1	0.27	Hist1h1d
14958	8	2.14	H1f0
14960	56	14.99	H2-Aa
14962	1296	346.94	Cfb
14964	134	35.87	H2-D1
14968	216	57.82	H2-Ea
14969	244	65.32	H2-Eb1
14977	158	42.3	Slc39a7
14979	175	46.85	H2-Ke6
14991	11	2.94	H2-M3
14998	126	33.73	H2-DMa
15001	3	0.8	H2-Oa
15002	1	0.27	H2-Ob
15006	1	0.27	H2-Q1
15040	9	2.41	H2-T23
15042	98	26.23	H2-T24
15051	7	1.87	H2-T9
15061	2153	576.36	H28
15064	17	4.55	Mr1
15081	577	154.46	H3f3b
15107	77	20.61	Hadh
15108	61	16.33	Hsd17b10
15109	1464	391.92	Hal
15115	126	33.73	Hars
15159	146	39.08	Hccs
15161	116	31.05	Hcfc1
15163	144	38.55	Hcls1
15166	1	0.27	Hcn2
15168	1	0.27	Hcn3
15170	628	168.12	Ptpn6
15182	106	28.38	Hdac2
15183	117	31.32	Hdac3
15184	335	89.68	Hdac5
15185	8	2.14	Hdac6
15186	1	0.27	Hdc
15191	120	32.12	Hdgf
15193	130	34.8	Hdgfrp2
15194	37	9.9	Htt
15199	256	68.53	Hebp1
15200	6	1.61	Hbegf
15201	11	2.94	Hells
15204	97	25.97	Herc2
15208	1	0.27	Hes5
15211	2447	655.07	Hexa
15212	3209	859.06	Hexb
15213	9	2.41	Hey1
15216	197	52.74	Hfe
15233	4	1.07	Hgd
15234	10	2.68	Hgf
15235	1	0.27	Mst1
15239	205	54.88	Hgs
15242	114	30.52	Hhex
15247	109	29.18	Hiat1
15251	239	63.98	Hif1a
15254	354	94.77	Hint1
15258	12	3.21	Hipk2
15260	95	25.43	Hira
15273	22	5.89	Hivep2
15275	64	17.13	Hk1
15277	270	72.28	Hk2
15278	33	8.83	Tfb2m
15284	43	11.51	Hlx
15288	2	0.54	Hmbs
15312	187	50.06	Hmgn1
15353	71	19.01	Hmg20b
15354	6	1.61	Hmgb3
15356	262	70.14	Hmgcl
15357	85	22.75	Hmgcr
15364	2	0.54	Hmga2
15366	4	1.07	Hmmr
15368	852	228.08	Hmox1
15369	781	209.08	Hmox2
15370	36	9.64	Nr4a1
15374	947	253.51	Hn1
15384	501	134.12	Hnrnpab
15388	722	193.28	Hnrnpl
15402	2	0.54	Hoxa5
15410	1	0.27	Hoxb3
15423	2	0.54	Hoxc4
15430	1	0.27	Hoxd10
15436	1	0.27	Hoxd4
15439	522	139.74	Hp
15441	224	59.97	Hp1bp3
15442	687	183.91	Hpse
15446	7	1.87	Hpgd
15450	6	1.61	Lipc
15451	5	1.34	Hpn
15452	796	213.09	Hprt1
15460	4	1.07	Hr
15461	108	28.91	Hras1
15463	129	34.53	Agfg1
15467	92	24.63	Eif2ak1
15468	76	20.35	Prmt2
15469	37	9.9	Prmt1
15476	1	0.27	Hs3st1
15478	1	0.27	Hs3st3a1
15481	24	6.42	Hspa8
15483	11	2.94	Hsd11b1
15485	2	0.54	Hsd17b1
15488	255	68.26	Hsd17b4
15490	6	1.61	Hsd17b7
15499	73	19.54	Hsf1
15500	101	27.04	Hsf2
15502	151	40.42	Dnaja1
15504	1	0.27	Dnajb3
15505	92	24.63	Hsph1
15507	9	2.41	Hspb1
15510	4	1.07	Hspd1
15511	3	0.8	Hspa1b
15512	32	8.57	Hspa2
15516	1087	290.99	Hsp90ab1
15519	230	61.57	Hsp90aa1
15525	492	131.71	Hspa4
15526	341	91.29	Hspa9
15529	1	0.27	Sdc2
15530	2	0.54	Hspg2
15531	66	17.67	Ndst1
15547	53	14.19	Trmt2a
15559	37	9.9	Htr2b
15566	3	0.8	Htr7
15567	1	0.27	Slc6a4
15568	162	43.37	Elavl1
15574	2	0.54	Hus1
15586	20	5.35	Hyal1
15587	37	9.9	Hyal2
15874	287	76.83	Iapp
15893	11	2.94	Ica1
15894	77	20.61	Icam1
15896	52	13.92	Icam2
15900	541	144.83	Irf8
15901	60	16.06	Id1
15902	2907	778.21	Id2
15903	378	101.19	Id3
15925	16	4.28	Ide
15926	728	194.89	Idh1
15929	228	61.04	Idh3g
15931	176	47.12	Ids
15932	17	4.55	Idua
15936	55	14.72	Ier2
15937	83	22.22	Ier3
15939	75	20.08	Ier5
15944	15	4.02	Irgm1
15950	617	165.17	Ifi203
15953	597	159.82	Ifi47
15957	558	149.38	Ifit1
15958	613	164.1	Ifit2
15959	1584	424.04	Ifit3
15975	90	24.09	Ifnar1
15976	1030	275.73	Ifnar2
15979	1080	289.12	Ifngr1
15980	262	70.14	Ifngr2
15982	120	32.12	Ifrd1
15983	39	10.44	Ifrd2
15985	7	1.87	Cd79b
16000	599	160.35	Igf1
16001	39	10.44	Igf1r
16002	2	0.54	Igf2
16004	123	32.93	Igf2r
16007	3	0.8	Cyr61
16009	3	0.8	Igfbp3
16010	33	8.83	Igfbp4
16012	6	1.61	Igfbp6
16068	175	46.85	Il18bp
16069	6	1.61	Igj
16145	215	57.56	Igtp
16147	1	0.27	Ihh
16149	10704	2865.48	Cd74
16150	146	39.08	Ikbkb
16151	111	29.71	Ikbkg
16154	166	44.44	Il10ra
16155	1206	322.85	Il10rb
16161	2	0.54	Il12rb1
16164	83	22.22	Il13ra1
16168	77	20.61	Il15
16169	23	6.16	Il15ra
16170	36	9.64	Il16
16172	180	48.19	Il17ra
16173	247	66.12	Il18
16175	86	23.02	Il1a
16176	21	5.62	Il1b
16177	2	0.54	Il1r1
16178	3	0.8	Il1r2
16180	42	11.24	Il1rap
16181	253	67.73	Il1rn
16182	2	0.54	Il18r1
16186	663	177.49	Il2rg
16188	69	18.47	Il3ra
16190	439	117.52	Il4ra
16192	1	0.27	Il5ra
16193	5	1.34	Il6
16194	12	3.21	Il6ra
16195	51	13.65	Il6st
16196	1	0.27	Il7
16197	1429	382.55	Il7r
16201	44	11.78	Ilf3
16202	679	181.77	Ilk
16206	9	2.41	Lrig1
16210	108	28.91	Impact
16211	240	64.25	Kpnb1
16319	110	29.45	Incenp
16328	113	30.25	Cep250
16329	7	1.87	Inpp1
16330	9	2.41	Inpp5b
16331	403	107.88	Inpp5d
16332	235	62.91	Inppl1
16337	52	13.92	Insr
16341	14	3.75	Eif3e
16348	33	8.83	Invs
16351	9	2.41	Ipp
16362	405	108.42	Irf1
16363	346	92.62	Irf2
16364	26	6.96	Irf4
16365	49	13.12	Irg1
16367	1	0.27	Irs1
16391	425	113.77	Irf9
16396	9	2.41	Itch
16399	6	1.61	Itga2b
16400	1	0.27	Itga3
16401	587	157.14	Itga4
16402	325	87	Itga5
16403	136	36.41	Itga6
16408	48	12.85	Itgal
16409	3638	973.9	Itgam
16410	505	135.19	Itgav
16411	124	33.2	Itgax
16412	1428	382.28	Itgb1
16413	83	22.22	Itgb1bp1
16414	833	223	Itgb2
16416	2	0.54	Itgb3
16418	386	103.33	Eif6
16419	566	151.52	Itgb5
16421	158	42.3	Itgb7
16423	1012	270.91	Cd47
16426	88	23.56	Itih3
16430	211	56.49	Stt3a
16431	1	0.27	Itm2a
16432	24228	6485.89	Itm2b
16434	2	0.54	Itpa
16439	34	9.1	Itpr2
16440	18	4.82	Itpr3
16443	305	81.65	Itsn1
16447	1	0.27	Ivl
16449	31	8.3	Jag1
16450	1	0.27	Jag2
16451	335	89.68	Jak1
16452	261	69.87	Jak2
16453	25	6.69	Jak3
16456	10	2.68	F11r
16468	76	20.35	Jarid2
16469	13	3.48	Jrk
16475	1	0.27	Jub
16476	1102	295.01	Jun
16477	240	64.25	Junb
16478	160	42.83	Jund
16480	40	10.71	Jup
16491	1	0.27	Kcna3
16498	136	36.41	Kcnab2
16500	29	7.76	Kcnb1
16514	1	0.27	Kcnj11
16518	84	22.49	Kcnj2
16534	30	8.03	Kcnn4
16538	3	0.8	Kcns1
16539	1	0.27	Kcns2
16541	166	44.44	Napsa
16542	14	3.75	Kdr
16543	550	147.24	Mdfic
16548	28	7.5	Khk
16549	96	25.7	Khsrp
16551	3	0.8	Kif11
16553	20	5.35	Kif13a
16554	2	0.54	Kif13b
16558	50	13.39	Kif16b
16560	1	0.27	Kif1a
16561	86	23.02	Kif1b
16562	70	18.74	Kif1c
16563	57	15.26	Kif2a
16564	2	0.54	Kif21a
16565	190	50.86	Kif21b
16568	366	97.98	Kif3a
16569	128	34.27	Kif3b
16570	7	1.87	Kif3c
16571	1	0.27	Kif4
16574	16	4.28	Kif5c
16576	5	1.34	Kif7
16578	1	0.27	Kif9
16579	128	34.27	Kifap3
16580	1	0.27	Kifc1
16581	5	1.34	Kifc2
16582	56	14.99	Kifc3
16588	49	13.12	Kin
16590	3	0.8	Kit
16592	66	17.67	Fabp5
16593	8	2.14	Klc1
16594	20	5.35	Klc2
16598	105	28.11	Klf2
16599	1	0.27	Klf3
16600	50	13.39	Klf4
16601	99	26.5	Klf9
16613	1	0.27	Klk1b11
16634	8	2.14	Klra3
16646	59	15.79	Kpna1
16648	83	22.22	Kpna3
16649	197	52.74	Kpna4
16650	128	34.27	Kpna6
16653	298	79.78	Kras
16656	10	2.68	Hivep3
16658	1421	380.4	Mafb
16664	3	0.8	Krt14
16667	5	1.34	Krt17
16668	1	0.27	Krt18
16669	2	0.54	Krt19
16691	6	1.61	Krt8
16706	2	0.54	Ksr1
16709	23	6.16	Ktn1
16728	32	8.57	L1cam
16763	1	0.27	Lad1
16768	3	0.8	Lag3
16774	10	2.68	Lama3
16777	2	0.54	Lamb1-1
16779	1	0.27	Lamb2
16782	4	1.07	Lamc2
16783	4615	1235.45	Lamp1
16784	2311	618.66	Lamp2
16785	2	0.54	Rpsa
16790	1038	277.87	Anpep
16792	2056	550.4	Laptm5
16795	49	13.12	Large
16796	1058	283.23	Lasp1
16797	54	14.46	Lat
16798	66	17.67	Lats1
16800	177	47.38	Arhgef2
16801	145	38.82	Arhgef1
16803	3	0.8	Lbp
16816	8	2.14	Lcat
16822	332	88.88	Lcp2
16825	187	50.06	Ldb1
16828	5412	1448.8	Ldha
16832	5	1.34	Ldhb
16834	38	10.17	Cog1
16835	321	85.93	Ldlr
16847	1	0.27	Lepr
16848	253	67.73	Lfng
16852	6421	1718.92	Lgals1
16854	334	89.41	Lgals3
16858	1	0.27	Lgals7
16859	1211	324.19	Lgals9
16865	80	21.42	Lgtn
16870	1	0.27	Lhx2
16880	10	2.68	Lifr
16881	17	4.55	Lig1
16882	24	6.42	Lig3
16885	102	27.31	Limk1
16886	35	9.37	Limk2
16889	2083	557.62	Lipa
16890	40	10.71	Lipe
16891	3	0.8	Lipg
16897	67	17.94	Llgl1
16904	1	0.27	Gzmm
16905	833	223	Lmna
16906	8	2.14	Lmnb1
16907	51	13.65	Lmnb2
16909	734	196.49	Lmo2
16911	97	25.97	Lmo4
16912	19	5.09	Psmb9
16913	236	63.18	Psmb8
16922	138	36.94	Phyh
16923	1	0.27	Sh2b3
16948	2	0.54	Lox
16949	2	0.54	Loxl1
16950	93	24.9	Loxl3
16952	2772	742.07	Anxa1
16956	877	234.77	Lpl
16963	2	0.54	Xcl1
16969	142	38.01	Zbtb7a
16970	39	10.44	Lrmp
16971	1191	318.83	Lrp1
16973	27	7.23	Lrp5
16974	14	3.75	Lrp6
16975	9	2.41	Lrp8
16976	468	125.28	Lrpap1
16978	258	69.07	Lrrfip1
16985	129	34.53	Lsp1
16987	66	17.67	Lss
16988	737	197.3	Lst1
16992	1	0.27	Lta
16993	1	0.27	Lta4h
16994	4	1.07	Ltb
16995	20	5.35	Ltb4r1
16997	18	4.82	Ltbp2
16998	157	42.03	Ltbp3
17000	450	120.47	Ltbr
17001	17	4.55	Ltc4s
17002	1	0.27	Ltf
17035	138	36.94	Lxn
17057	4	1.07	Klrb1a
17060	189	50.6	Blnk
17064	1489	398.61	Cd93
17067	3	0.8	Ly6c1
17068	1	0.27	Ly6d
17069	4970	1330.48	Ly6e
17076	1	0.27	Ly75
17079	390	104.4	Cd180
17082	13	3.48	Il1rl1
17083	57	15.26	Tmed1
17085	316	84.59	Ly9
17087	91	24.36	Ly96
17089	58	15.53	Lyar
17095	723	193.55	Lyl1
17101	4	1.07	Lyst
17105	2086	558.43	Lyz2
17110	69877	18706.2	Lyz1
17112	15	4.02	Tm4sf1
17113	421	112.7	M6pr
17117	1	0.27	Amacr
17118	1332	356.58	Marcks
17119	108	28.91	Mxd1
17120	38	10.17	Mad1l1
17121	73	19.54	Mxd3
17122	103	27.57	Mxd4
17125	48	12.85	Smad1
17126	70	18.74	Smad2
17127	17	4.55	Smad3
17129	1	0.27	Smad5
17130	25	6.69	Smad6
17131	70	18.74	Smad7
17132	1	0.27	Maf
17133	4	1.07	Maff
17135	194	51.93	Mafk
17136	38	10.17	Mag
17149	73	19.54	Magoh
17150	1	0.27	Mfap2
17151	47	12.58	Ccndbp1
17152	1	0.27	Mak
17155	146	39.08	Man1a
17156	103	27.57	Man1a2
17158	260	69.6	Man2a1
17159	593	158.75	Man2b1
17160	228	61.04	Man2b2
17161	52	13.92	Maoa
17164	647	173.2	Mapkapk2
17165	91	24.36	Mapkapk5
17167	145	38.82	Marco
17168	23	6.16	Mare
17175	1	0.27	Masp2
17179	105	28.11	Matk
17181	5	1.34	Matn2
17184	224	59.97	Matr3
17188	172	46.04	Maz
17190	24	6.42	Mbd1
17191	587	157.14	Mbd2
17192	236	63.18	Mbd3
17193	11	2.94	Mbd4
17196	85	22.75	Mbp
17207	25	6.69	Mcf2l
17210	1029	275.47	Mcl1
17216	59	15.79	Mcm2
17217	41	10.98	Mcm4
17218	40	10.71	Mcm5
17219	128	34.27	Mcm6
17220	47	12.58	Mcm7
17222	306	81.92	Anapc1
17227	7	1.87	Mcpt4
17229	90	24.09	Tpsb2
17237	40	10.71	Mgrn1
17242	12	3.21	Mdk
17245	19	5.09	Mdm1
17246	217	58.09	Mdm2
17248	11	2.94	Mdm4
17250	93	24.9	Abcc1
17252	15	4.02	Rdh11
17254	163	43.64	Slc3a2
17256	214	57.29	Mea1
17257	65	17.4	Mecp2
17261	44	11.78	Mef2d
17263	4	1.07	Meg3
17274	234	62.64	Rab8a
17279	10	2.68	Melk
17281	63	16.87	Fyco1
17287	1	0.27	Mep1a
17289	31	8.3	Mertk
17293	1	0.27	Mesp2
17295	58	15.53	Met
17299	10	2.68	Mettl1
17300	1	0.27	Foxc1
17304	91	24.36	Mfge8
17305	13	3.48	Mfng
17308	785	210.15	Mgat1
17311	6	1.61	Kitl
17314	7	1.87	Mgmt
17318	80	21.42	Mid1
17329	1	0.27	Cxcl9
17330	2	0.54	Minpp1
17339	1	0.27	Mip
17344	117	31.32	Pias2
17345	50	13.39	Mki67
17346	246	65.85	Mknk1
17347	542	145.09	Mknk2
17349	4	1.07	Mlf1
17350	30	8.03	Mlh1
17354	69	18.47	Mllt10
17355	105	28.11	Aff1
17356	113	30.25	Mllt4
17357	301	80.58	Marcksl1
17381	1673	447.87	Mmp12
17384	1	0.27	Mmp10
17387	243	65.05	Mmp14
17390	1	0.27	Mmp2
17391	10	2.68	Mmp24
17392	1	0.27	Mmp3
17394	272	72.81	Mmp8
17395	38	10.17	Mmp9
17420	40	10.71	Mnat1
17423	203	54.34	Ndst2
17425	36	9.64	Foxk1
17428	329	88.07	Mnt
17434	403	107.88	Mocs2
17448	602	161.16	Mdh2
17449	524	140.28	Mdh1
17454	175	46.85	Mov10
17470	78	20.88	Cd200
17472	8	2.14	Gbp4
17474	646	172.94	Clec4d
17476	14788	3958.78	Mpeg1
17524	991	265.29	Mpp1
17527	26	6.96	Mpv17
17532	9	2.41	Mras
17533	426	114.04	Mrc1
17535	20	5.35	Mre11a
17536	1	0.27	Meis2
17540	1	0.27	Mrvi1
17684	121	32.39	Cited2
17687	26	6.96	Msh5
17688	13	3.48	Msh6
17691	2	0.54	Sik1
17692	48	12.85	Msl3
17698	532	142.42	Msn
17713	220	58.89	Grpel1
17714	10	2.68	Grpel2
17750	203	54.34	Mt2
17755	4	1.07	Mtap1b
17758	442	118.32	Mtap4
17760	41	10.98	Mtap6
17763	10	2.68	Mtcp1
17764	104	27.84	Mtf1
17765	81	21.68	Mtf2
17766	8	2.14	Nudt1
17768	48	12.85	Mthfd2
17769	161	43.1	Mthfr
17771	2	0.54	Mtl5
17772	177	47.38	Mtm1
17775	1139	304.91	Laptm4a
17776	58	15.53	Mast2
17777	2	0.54	Mttp
17826	296	79.24	Mtvr2
17827	97	25.97	Mtx1
17828	121	32.39	Muted
17829	2	0.54	Muc1
17846	556	148.84	Commd1
17855	1	0.27	Mvk
17857	705	188.73	Mx1
17858	88	23.56	Mx2
17859	110	29.45	Mxi1
17863	1	0.27	Myb
17865	4	1.07	Mybl2
17868	2	0.54	Mybpc3
17872	10	2.68	Ppp1r15a
17873	19	5.09	Gadd45b
17874	92	24.63	Myd88
17876	22	5.89	Myef2
17883	1	0.27	Myh3
17886	124	33.2	Myh9
17909	51	13.65	Myo10
17912	15	4.02	Myo1b
17913	145	38.82	Myo1c
17916	34	9.1	Myo1f
17918	1195	319.9	Myo5a
17920	8	2.14	Myo6
17921	2	0.54	Myo7a
17925	426	114.04	Myo9b
17929	2	0.54	Myom1
17931	49	13.12	Ppp1r12a
17936	109	29.18	Nab1
17937	108	28.91	Nab2
17938	1465	392.18	Naca
17939	327	87.54	Naga
17940	28	7.5	Naip1
17948	6	1.61	Naip2
17952	65	17.4	Naip6
17954	1	0.27	Nap1l2
17955	116	31.05	Nap1l4
17957	3	0.8	Napb
17965	6	1.61	Nbl1
17966	213	57.02	Nbr1
17967	1	0.27	Ncam1
17968	1	0.27	Ncam2
17969	3456	925.18	Ncf1
17970	4	1.07	Ncf2
17972	1173	314.01	Ncf4
17973	159	42.56	Nck1
17975	581	155.53	Ncl
17978	52	13.92	Ncoa2
17979	260	69.6	Ncoa3
17984	2	0.54	Ndn
17988	164	43.9	Ndrg1
17991	867	232.1	Ndufa2
17992	671	179.63	Ndufa4
17995	85	22.75	Ndufv1
17997	141	37.75	Nedd1
17999	6	1.61	Nedd4
18000	487	130.37	2010-09-02
18002	688	184.18	Nedd8
18003	41	10.98	Nedd9
18005	1	0.27	Nek2
18007	24	6.42	Neo1
18008	2	0.54	Nes
18010	324	86.74	Neu1
18015	42	11.24	Nf1
18016	86	23.02	Nf2
18018	142	38.01	Nfatc1
18019	60	16.06	Nfatc2
18020	19	5.09	Nfatc2ip
18021	112	29.98	Nfatc3
18022	9	2.41	Nfe2
18023	458	122.61	Nfe2l1
18024	21	5.62	Nfe2l2
18027	16	4.28	Nfia
18028	4	1.07	Nfib
18029	507	135.72	Nfic
18032	31	8.3	Nfix
18033	370	99.05	Nfkb1
18035	372	99.59	Nfkbia
18036	71	19.01	Nfkbib
18037	80	21.42	Nfkbie
18038	30	8.03	Nfkbil1
18041	94	25.16	Nfs1
18044	230	61.57	Nfya
18045	43	11.51	Nfyb
18046	123	32.93	Nfyc
18049	1	0.27	Ngf
18073	6	1.61	Nid1
18074	1	0.27	Nid2
18080	94	25.16	Nin
18081	578	154.73	Ninj1
18082	19	5.09	Nipsnap1
18087	148	39.62	Nktr
18100	223	59.7	Mrpl40
18103	1	0.27	Nme2
18104	34	9.1	Nqo1
18105	137	36.68	Nqo2
18108	5	1.34	Nmt2
18109	1	0.27	Mycn
18114	180	48.19	Rrp1
18115	159	42.56	Nnt
18117	103	27.57	Cox4nb
18120	32	8.57	Mrpl49
18127	3	0.8	Nos3
18128	253	67.73	Notch1
18129	38	10.17	Notch2
18130	7	1.87	Ints6
18131	1	0.27	Notch3
18132	6	1.61	Notch4
18133	11	2.94	Nov
18139	224	59.97	Zfml
18140	30	8.03	Uhrf1
18141	214	57.29	Nup50
18143	1	0.27	Npas2
18145	1407	376.66	Npc1
18146	6	1.61	Npdc1
18160	3	0.8	Npr1
18173	18	4.82	Slc11a1
18174	784	209.88	Slc11a2
18175	3	0.8	Nrap
18176	202	54.08	Nras
18181	40	10.71	Nrf1
18186	505	135.19	Nrp1
18187	181	48.45	Nrp2
18191	1	0.27	Nrxn3
18193	181	48.45	Nsd1
18194	41	10.98	Nsdhl
18195	70	18.74	Nsf
18201	83	22.22	Nsmaf
18203	174	46.58	Ntan1
18207	7	1.87	Nthl1
18213	1	0.27	Ntrk3
18214	24	6.42	Ddr2
18218	1	0.27	Dusp8
18220	1262	337.84	Nucb1
18222	8	2.14	Numb
18223	5	1.34	Numbl
18226	119	31.86	Nup62
18242	100	26.77	Oat
18260	2	0.54	Ocln
18293	74	19.81	Ogdh
18294	12	3.21	Ogg1
18301	23	6.16	Fxyd5
18302	35	9.37	Oit3
18378	2	0.54	Omp
18383	2	0.54	Tnfrsf11b
18391	222	59.43	Sigmar1
18392	5	1.34	Orc1l
18393	22	5.89	Orc2l
18400	11	2.94	Slc22a18
18408	25	6.69	Slc25a15
18412	2117	566.73	Sqstm1
18413	24	6.42	Osm
18415	16	4.28	Hspa4l
18430	5	1.34	Oxtr
18432	134	35.87	Mybbp1a
18436	10	2.68	P2rx1
18438	730	195.42	P2rx4
18439	98	26.23	P2rx7
18441	15	4.02	P2ry1
18442	113	30.25	P2ry2
18451	176	47.12	P4ha1
18452	8	2.14	P4ha2
18453	2431	650.78	P4hb
18457	93	24.9	Pldn
18472	294	78.7	Pafah1b1
18475	177	47.38	Pafah1b2
18476	23	6.16	Pafah1b3
18477	107	28.64	Prdx1
18479	90	24.09	Pak1
18483	169	45.24	Palm
18484	17	4.55	Pam
18508	1	0.27	Pax6
18514	1	0.27	Pbx1
18515	210	56.22	Pbx2
18518	194	51.93	Igbp1
18519	91	24.36	Kat2b
18530	11	2.94	Pcdh8
18536	86	23.02	Pcm1
18537	77	20.61	Pcmt1
18541	24	6.42	Pcnt
18550	258	69.07	Furin
18552	1	0.27	Pcsk5
18554	65	17.4	Pcsk7
18555	59	15.79	Pctk1
18557	4	1.07	Pctk3
18559	61	16.33	Pctp
18563	3	0.8	Pcx
18567	25	6.69	Pdcd2
18570	517	138.4	Pdcd6
18571	178	47.65	Pdcd6ip
18572	34	9.1	Pdcd11
18574	232	62.11	Pde1b
18577	25	6.69	Pde4a
18582	67	17.94	Pde6d
18583	29	7.76	Pde7a
18590	2	0.54	Pdgfa
18591	51	13.65	Pdgfb
18596	2	0.54	Pdgfrb
18597	423	113.24	Pdha1
18601	1	0.27	Padi3
18602	18	4.82	Padi4
18604	15	4.02	Pdk2
18605	112	29.98	Enpp1
18606	2	0.54	Enpp2
18607	122	32.66	Pdpk1
18611	471	126.09	Pea15a
18612	1	0.27	Etv4
18618	8	2.14	Pemt
18619	249	66.66	Penk
18624	843	225.67	Pepd
18626	32	8.57	Per1
18627	16	4.28	Per2
18628	27	7.23	Per3
18631	2	0.54	Pex11a
18632	64	17.13	Pex11b
18633	53	14.19	Pex16
18634	63	16.87	Pex7
18636	1788	478.65	Cfp
18637	117	31.32	Pfdn2
18639	8	2.14	Pfkfb1
18640	132	35.34	Pfkfb2
18641	193	51.67	Pfkl
18642	4	1.07	Pfkm
18643	3064	820.24	Pfn1
18645	2	0.54	Pfn2
18647	219	58.63	Pftk1
18648	917	245.48	Pgam1
18669	21	5.62	Abcb1b
18670	2	0.54	Abcb4
18671	9	2.41	Abcb1a
18674	80	21.42	Slc25a3
18679	17	4.55	Phka1
18682	1	0.27	Phkg1
18685	24	6.42	Phtf1
18693	28	7.5	Pick1
18700	31	8.3	Piga
18701	25	6.69	Pigf
18704	91	24.36	Pik3c2a
18706	202	54.08	Pik3ca
18707	150	40.16	Pik3cd
18708	134	35.87	Pik3r1
18709	47	12.58	Pik3r2
18710	1	0.27	Pik3r3
18711	126	33.73	Pikfyve
18712	13	3.48	Pim1
18715	9	2.41	Pim2
18717	317	84.86	Pip5k1c
18718	327	87.54	Pip4k2a
18719	2	0.54	Pip5k1b
18720	11	2.94	Pip5k1a
18726	16	4.28	Pira3
18738	803	214.96	Pitpna
18739	36	9.64	Pitpnm1
18744	76	20.35	Pja1
18746	1	0.27	Pkm2
18747	175	46.85	Prkaca
18749	137	36.68	Prkacb
18750	7	1.87	Prkca
18751	220	58.89	Prkcb
18753	1208	323.38	Prkcd
18755	80	21.42	Prkch
18759	79	21.15	Prkci
18763	66	17.67	Pkd1
18764	33	8.83	Pkd2
18767	2	0.54	Pkia
18769	421	112.7	Pkig
18770	1	0.27	Pklr
18771	20	5.35	Pknox1
18777	312	83.52	Lypla1
18779	2	0.54	Pla2r1
18783	44	11.78	Pla2g4a
18786	167	44.71	Plaa
18787	104	27.84	Serpine1
18789	354	94.77	Papola
18791	5	1.34	Plat
18793	193	51.67	Plaur
18795	12	3.21	Plcb1
18796	22	5.89	Plcb2
18797	120	32.12	Plcb3
18799	4	1.07	Plcd1
18805	81	21.68	Pld1
18806	49	13.12	Pld2
18807	2243	600.46	Pld3
18810	439	117.52	Plec1
18813	250	66.93	Pa2g4
18817	10	2.68	Plk1
18822	320	85.66	Plod1
18826	442	118.32	Lcp1
18828	4	1.07	Plscr2
18830	734	196.49	Pltp
18844	320	85.66	Plxna1
18845	8	2.14	Plxna2
18846	11	2.94	Plxna3
18854	282	75.49	Pml
18858	527	141.08	Pmp22
18861	14	3.75	Pms2
18933	4	1.07	Prrx1
18938	2	0.54	Ppp1r14b
18949	143	38.28	Pnn
18950	10	2.68	Pnp1
18968	7	1.87	Pola1
18969	23	6.16	Pola2
18970	114	30.52	Polb
18971	41	10.98	Pold1
18972	4	1.07	Pold2
18973	5	1.34	Pole
18974	13	3.48	Pole2
18975	36	9.64	Polg
18976	2	0.54	Pomc
18983	13	3.48	Cnot7
18984	2554	683.71	Por
18986	8	2.14	Pou2f1
18987	58	15.53	Pou2f2
19009	10	2.68	Pou6f1
19012	2	0.54	Ppap2a
19014	306	81.92	Med1
19015	44	11.78	Ppard
19016	108	28.91	Pparg
19017	1	0.27	Ppargc1a
19018	183	48.99	Scand1
19024	15	4.02	Ppfibp2
19025	2937	786.24	Ctsa
19027	697	186.59	Sypl
19035	1496	400.48	Ppib
19038	18	4.82	Ppic
19039	6044	1617.99	Lgals3bp
19042	120	32.12	Ppm1a
19043	25	6.69	Ppm1b
19044	75	20.08	Ppox
19045	1654	442.78	Ppp1ca
19047	17	4.55	Ppp1cc
19052	253	67.73	Ppp2ca
19053	2	0.54	Ppp2cb
19054	352	94.23	Ppp2r3d
19055	64	17.13	Ppp3ca
19057	6	1.61	Ppp3cc
19058	706	189	Ppp3r1
19060	121	32.39	Ppp5c
19062	140	37.48	Inpp5k
19063	288	77.1	Ppt1
19069	112	29.98	Nup88
19070	261	69.87	Mobkl3
19072	52	13.92	Prep
19073	1338	358.19	Srgn
19075	21	5.62	Prim1
19076	2	0.54	Prim2
19079	2	0.54	Prkab1
19082	3	0.8	Prkag1
19084	666	178.29	Prkar1a
19085	17	4.55	Prkar1b
19087	8	2.14	Prkar2a
19088	19	5.09	Prkar2b
19089	103	27.57	Prkcsh
19090	51	13.65	Prkdc
19091	1	0.27	Prkg1
19094	2	0.54	Mapk11
19099	1	0.27	Mapk8ip1
19106	524	140.28	Eif2ak2
19108	67	17.94	Prkx
19122	87	23.29	Prnp
19123	1	0.27	Proc
19124	3	0.8	Procr
19125	3	0.8	Prodh
19128	251	67.19	Pros1
19134	139	37.21	Prpf4b
19139	56	14.99	Prps1
19141	5115	1369.3	Lgmn
19143	20	5.35	St14
19152	3	0.8	Prtn3
19153	3	0.8	Prx
19155	168	44.97	Npepps
19156	21990	5886.77	Psap
19157	276	73.89	Cyth1
19158	224	59.97	Cyth2
19159	172	46.04	Cyth3
19164	61	16.33	Psen1
19165	261	69.87	Psen2
19166	1259	337.04	Psma2
19167	35	9.37	Psma3
19170	1546	413.87	Psmb1
19171	1768	473.3	Psmb10
19172	577	154.46	Psmb4
19173	2	0.54	Psmb5
19175	413	110.56	Psmb6
19177	583	156.07	Psmb7
19179	8	2.14	Psmc1
19181	241	64.52	Psmc2
19182	294	78.7	Psmc3
19183	15	4.02	Psmc3ip
19184	303	81.11	Psmc5
19185	120	32.12	Psmd4
19186	8	2.14	Psme1
19188	1131	302.77	Psme2
19192	292	78.17	Psme3
19200	118	31.59	Pstpip1
[truncated: 9,777 more rows]

## Sheet: M90.GeneExpression
Gene	GeneExpression	TPM(Gene)	Symbol
11303	635	171.42	Abca1
11305	11	2.97	Abca2
11306	42	11.34	Abcb7
11307	45	12.15	Abcg1
11308	563	151.98	Abi1
11350	6	1.62	Abl1
11352	24	6.48	Abl2
11363	226	61.01	Acadl
11364	21	5.67	Acadm
11370	62	16.74	Acadvl
11409	31	8.37	Acads
11416	70	18.9	Slc33a1
11421	1	0.27	Ace
11425	3	0.81	Apoc4
11426	370	99.88	Macf1
11428	5	1.35	Aco1
11429	127	34.28	Aco2
11430	94	25.38	Acox1
11431	3	0.81	Acp1
11433	3248	876.79	Acp5
11459	2	0.54	Acta1
11461	5513	1488.23	Actb
11475	4	1.08	Acta2
11477	18	4.86	Acvr1
11479	29	7.83	Acvr1b
11480	30	8.1	Acvr2a
11482	9	2.43	Acvrl1
11486	12	3.24	Ada
11487	179	48.32	Adam10
11489	7	1.89	Adam12
11490	206	55.61	Adam15
11491	1410	380.63	Adam17
11501	252	68.03	Adam8
11502	425	114.73	Adam9
11504	15	4.05	Adamts1
11512	5	1.35	Adcy6
11513	74	19.98	Adcy7
11515	4	1.08	Adcy9
11518	84	22.68	Add1
11520	682	184.11	Plin2
11532	253	68.3	Adh5
11534	48	12.96	Adk
11535	6	1.62	Adm
11538	119	32.12	Adnp
11540	108	29.15	Adora2a
11541	2	0.54	Adora2b
11544	107	28.88	Adprh
11545	31	8.37	Parp1
11546	73	19.71	Parp2
11555	5	1.35	Adrb2
11564	64	17.28	Adsl
11565	160	43.19	Adssl1
11566	94	25.38	Adss
11568	2	0.54	Aebp1
11569	357	96.37	Aebp2
11576	19	5.13	Afp
11593	124	33.47	Aga
11596	10	2.7	Ager
11601	9	2.43	Angpt2
11603	163	44	Agrn
11605	264	71.27	Gla
11610	363	97.99	Agtrap
11622	22	5.94	Ahr
11624	21	5.67	Ahrr
11629	253	68.3	Aif1
11630	44	11.88	Aim1
11632	28	7.56	Aip
11636	1	0.27	Ak1
11637	14	3.78	Ak2
11640	4	1.08	Akap1
11641	16	4.32	Akap2
11655	161	43.46	Alas1
11658	803	216.77	Alcam
11666	2	0.54	Abcd1
11669	817	220.55	Aldh2
11671	77	20.79	Aldh3a2
11676	2	0.54	Aldoc
11677	204	55.07	Akr1b3
11687	100	26.99	Alox15
11689	8	2.16	Alox5
11690	187	50.48	Alox5ap
11692	17	4.59	Gfer
11698	5	1.35	Ambn
11699	4	1.08	Ambp
11717	421	113.65	Ampd3
11722	3	0.81	Amy1
11727	5	1.35	Ang
11732	22	5.94	Ank
11735	1	0.27	Ank3
11736	129	34.82	Ankfy1
11737	350	94.48	Anp32a
11739	136	36.71	Slc25a4
11740	1578	425.98	Slc25a5
11744	3	0.81	Anxa11
11746	3763	1015.82	Anxa4
11747	4283	1156.19	Anxa5
11749	175	47.24	Anxa6
11750	623	168.18	Anxa7
11752	1	0.27	Anxa8
11757	80	21.6	Prdx3
11764	28	7.56	Ap1b1
11766	9	2.43	Ap1g2
11767	203	54.8	Ap1m1
11768	1	0.27	Ap1m2
11769	19	5.13	Ap1s1
11770	378	102.04	Fabp4
11771	119	32.12	Ap2a1
11772	77	20.79	Ap2a2
11773	992	267.79	Ap2m1
11774	156	42.11	Ap3b1
11776	694	187.34	Ap3d1
11777	1	0.27	Ap3s1
11778	15	4.05	Ap3s2
11781	3	0.81	Ap4m1
11782	67	18.09	Ap4s1
11783	207	55.88	Apaf1
11787	1	0.27	Apbb2
11792	24	6.48	Apex1
11793	134	36.17	Atg5
11796	541	146.04	Birc3
11797	27	7.29	Birc2
11798	115	31.04	Xiap
11799	11	2.97	Birc5
11800	213	57.5	Api5
11801	19	5.13	Cd5l
11804	415	112.03	Aplp2
11810	164	44.27	Apobec1
11812	76	20.52	Apoc1
11813	296	79.9	Apoc2
11816	14980	4043.83	Apoe
11819	2	0.54	Nr2f2
11820	2360	637.08	App
11821	320	86.38	Aprt
11834	52	14.04	Aqr
11836	84	22.68	Araf
11837	12	3.24	Rplp0
11838	1	0.27	Arc
11839	4	1.08	Areg
11841	163	44	Arf2
11842	315	85.03	Arf3
11843	1744	470.79	Arf4
11844	17	4.59	Arf5
11845	1095	295.59	Arf6
11846	787	212.45	Arg1
11847	3170	855.74	Arg2
11852	294	79.36	Rhob
11853	805	217.31	Rhoc
11854	1	0.27	Rhod
11855	1	0.27	Arhgap5
11856	55	14.85	Arhgap6
11857	718	193.82	Arhgdib
11861	20	5.4	Arl4a
11863	193	52.1	Arnt
11865	10	2.7	Arntl
11867	2193	592	Arpc1b
11876	3	0.81	Artn
11877	5	1.35	Arvcf
11881	581	156.84	Arsb
11886	580	156.57	Asah1
11891	8	2.16	Rab27a
11898	67	18.09	Ass1
11899	1	0.27	Astn1
11906	16	4.32	Zfhx3
11907	57	15.39	Ate1
11909	226	61.01	Atf2
11910	726	195.98	Atf3
11911	733	197.87	Atf4
11920	10	2.7	Atm
11922	1	0.27	Neurod6
11927	1494	403.3	Atox1
11928	799	215.69	Atp1a1
11931	1	0.27	Atp1b1
11933	763	205.97	Atp1b3
11936	3	0.81	Fxyd2
11938	306	82.6	Atp2a2
11946	561	151.44	Atp5a1
11947	792	213.8	Atp5b
11949	358	96.64	Atp5c1
11958	195	52.64	Atp5k
11964	2135	576.34	Atp6v1a
11966	1034	279.13	Atp6v1b2
11972	924	249.43	Atp6v0d1
11973	1904	513.98	Atp6v1e1
11974	692	186.8	Atp6v0e
11975	180	48.59	Atp6v0a1
11977	100	26.99	Atp7a
11980	17	4.59	Atp8a1
11982	25	6.75	Atp10a
11983	159	42.92	Atpif1
11987	62	16.74	Slc7a1
11988	2534	684.05	Slc7a2
11989	1	0.27	Slc7a3
11990	58	15.66	Atrn
11991	538	145.23	Hnrnpd
11992	35	9.45	Auh
11993	233	62.9	Aup1
12005	1	0.27	Axin1
12006	1	0.27	Axin2
12010	489	132	B2m
12013	33	8.91	Bach1
12014	3	0.81	Bach2
12018	262	70.73	Bak1
12021	1	0.27	Bard1
12028	47	12.69	Bax
12033	68	18.36	Bcap29
12034	354	95.56	Phb2
12035	4	1.08	Bcat1
12036	90	24.3	Bcat2
12039	33	8.91	Bckdha
12041	28	7.56	Bckdk
12042	229	61.82	Bcl10
12043	15	4.05	Bcl2
12046	1	0.27	Bcl2a1c
12048	421	113.65	Bcl2l1
12050	22	5.94	Bcl2l2
12051	278	75.05	Bcl3
12053	213	57.5	Bcl6
12054	74	19.98	Bcl7b
12055	17	4.59	Bcl7c
12061	1	0.27	Bdkrb1
12068	37	9.99	Bet1
12070	50	13.5	Ngfrap1
12091	52	14.04	Glb1
12095	28	7.56	Bglap-rs1
12111	1	0.27	Bgn
12122	115	31.04	Bid
12125	88	23.76	Bcl2l11
12140	1460	394.13	Fabp7
12142	51	13.77	Prdm1
12144	4	1.08	Blm
12145	4	1.08	Cxcr5
12151	24	6.48	Bmi1
12156	18	4.86	Bmp2
12159	1	0.27	Bmp4
12162	190	51.29	Bmp7
12166	15	4.05	Bmpr1a
12168	6	1.62	Bmpr2
12173	1	0.27	Bnc1
12175	821	221.63	Bnip2
12177	216	58.31	Bnip3l
12181	31	8.37	Bop1
12182	948	255.91	Bst1
12183	3	0.81	Bpgm
12189	1	0.27	Brca1
12192	86	23.22	Zfp36l1
12193	106	28.61	Zfp36l2
12211	277	74.78	Birc6
12215	255	68.84	Bsg
12217	8	2.16	Bsn
12223	2	0.54	Btc
12224	1	0.27	Klf5
12226	74	19.98	Btg1
12227	46	12.42	Btg2
12229	25	6.75	Btk
12234	9	2.43	Btrc
12235	4	1.08	Bub1
12236	2	0.54	Bub1b
12237	213	57.5	Bub3
12238	199	53.72	Commd3
12257	3822	1031.74	Tspo
12259	381	102.85	C1qa
12260	164	44.27	C1qb
12261	125	33.74	C1qbp
12262	31	8.37	C1qc
12263	12	3.24	C2
12265	9	2.43	Ciita
12267	2154	581.47	C3ar1
12279	7	1.89	C9
12282	33	8.91	Hyou1
12283	343	92.59	Cab39
12286	23	6.21	Cacna1a
12287	1	0.27	Cacna1b
12288	1	0.27	Cacna1c
12289	68	18.36	Cacna1d
12292	1	0.27	Cacna1s
12295	6	1.62	Cacnb1
12297	32	8.64	Cacnb3
12301	446	120.4	Cacybp
12304	75	20.25	Pdia4
12305	1	0.27	Ddr1
12306	1552	418.96	Anxa2
12310	3	0.81	Calca
12311	2	0.54	Calcr
12313	2805	757.21	Calm1
12314	401	108.25	Calm2
12315	254	68.57	Calm3
12316	2	0.54	Aspm
12317	1742	470.25	Calr
12321	193	52.1	Calu
12328	49	13.23	Caml
12330	2239	604.42	Canx
12331	966	260.77	Cap1
12332	3352	904.87	Capg
12333	46	12.42	Capn1
12334	332	89.62	Capn2
12336	996	268.87	Capns1
12337	2	0.54	Capn5
12339	29	7.83	Capn7
12343	1341	362	Capza2
12345	407	109.87	Capzb
12349	69	18.63	Car2
12351	3	0.81	Car4
12352	3	0.81	Car5a
12353	1	0.27	Car6
12359	23	6.21	Cat
12361	35	9.45	Cask
12366	10	2.7	Casp2
12367	3	0.81	Casp3
12368	53	14.31	Casp6
12369	385	103.93	Casp7
12370	305	82.33	Casp8
12371	31	8.37	Casp9
12373	209	56.42	Casq2
12374	1	0.27	Casr
12380	153	41.3	Cast
12385	346	93.4	Ctnna1
12387	1594	430.3	Ctnnb1
12388	119	32.12	Ctnnd1
12389	656	177.09	Cav1
12390	115	31.04	Cav2
12393	10	2.7	Runx2
12394	131	35.36	Runx1
12396	1	0.27	Cbfa2t2
12398	1	0.27	Cbfa2t3
12399	9	2.43	Runx3
12400	161	43.46	Cbfb
12406	20	5.4	Serpinh1
12408	13	3.51	Cbr1
12409	784	211.64	Cbr2
12418	5	1.35	Cbx4
12419	45	12.15	Cbx5
12421	34	9.18	Rb1cc1
12428	26	7.02	Ccna2
12442	4	1.08	Ccnb2
12443	10	2.7	Ccnd1
12444	39	10.53	Ccnd2
12445	40	10.8	Ccnd3
12447	4	1.08	Ccne1
12448	3	0.81	Ccne2
12449	11	2.97	Ccnf
12450	47	12.69	Ccng1
12452	146	39.41	Ccng2
12453	183	49.4	Ccni
12460	30	8.1	Ccs
12461	199	53.72	Cct2
12462	117	31.58	Cct3
12464	209	56.42	Cct4
12465	211	56.96	Cct5
12466	110	29.69	Cct6a
12468	128	34.55	Cct7
12469	174	46.97	Cct8
12475	321	86.65	Cd14
12476	74	19.98	Cd151
12478	9	2.43	Cd19
12481	4	1.08	Cd2
12482	12	3.24	Ms4a1
12483	11	2.97	Cd22
12484	911	245.92	Cd24a
12488	67	18.09	Cd2ap
12489	159	42.92	Cd33
12490	1	0.27	Cd34
12491	1787	482.4	Cd36
12492	400	107.98	Scarb2
12493	810	218.66	Cd37
12494	2418	652.74	Cd38
12495	122	32.93	Entpd1
12497	2	0.54	Entpd6
12499	18	4.86	Entpd5
12502	2	0.54	Cd3g
12503	2	0.54	Cd247
12505	1	0.27	Cd44
12506	695	187.61	Cd48
12508	2266	611.7	Cd53
12509	1	0.27	Cd59a
12511	1	0.27	Cd6
12512	905	244.3	Cd63
12514	45	12.15	Cd68
12515	81	21.87	Cd69
12517	20	5.4	Cd72
12518	1	0.27	Cd79a
12519	7	1.89	Cd80
12520	15	4.05	Cd81
12521	150	40.49	Cd82
12522	52	14.04	Cd83
12523	494	133.35	Cd84
12524	262	70.73	Cd86
12525	3	0.81	Cd8a
12526	1	0.27	Cd8b1
12527	1084	292.62	Cd9
12530	17	4.59	Cdc25a
12532	2	0.54	Cdc25c
12534	11	2.97	Cdc2a
12537	73	19.71	Cdc2l1
12539	55	14.85	Cdc37
12540	2638	712.12	Cdc42
12544	2	0.54	Cdc45l
12545	4	1.08	Cdc7
12549	43	11.61	Cdgap
12550	1	0.27	Cdh1
12552	8	2.16	Cdh11
12557	1	0.27	Cdh17
12560	1	0.27	Cdh3
12562	12	3.24	Cdh5
12566	29	7.83	Cdk2
12568	30	8.1	Cdk5
12569	7	1.89	Cdk5r1
12571	19	5.13	Cdk6
12572	38	10.26	Cdk7
12575	68	18.36	Cdkn1a
12576	48	12.96	Cdkn1b
12577	2	0.54	Cdkn1c
12578	9	2.43	Cdkn2a
12579	6	1.62	Cdkn2b
12583	1	0.27	Cdo1
12585	12	3.24	Cdr2
12589	1	0.27	Ift81
12593	33	8.91	Cdyl
12606	200	53.99	Cebpa
12607	24	6.48	Cebpz
12608	1236	333.66	Cebpb
12609	132	35.63	Cebpd
12611	107	28.88	Cebpg
12615	8	2.16	Cenpa
12616	113	30.5	Cenpb
12617	24	6.48	Cenpc1
12626	342	92.32	Cetn3
12628	1	0.27	Cfh
12632	24	6.48	Cfl2
12633	942	254.29	Cflar
12642	531	143.34	Ch25h
12648	188	50.75	Chd1
12649	2	0.54	Chek1
12652	1	0.27	Chga
12654	3	0.81	Chi3l1
12655	2395	646.53	Chi3l3
12659	1	0.27	Ovgp1
12660	23	6.21	Chka
12661	1	0.27	Chl1
12663	9	2.43	Chml
12675	86	23.22	Chuk
12684	1	0.27	Cideb
12696	26	7.02	Cirbp
12700	17	4.59	Cish
12702	2119	572.02	Socs3
12703	108	29.15	Socs1
12709	1	0.27	Ckb
12715	3	0.81	Ckm
12721	285	76.94	Coro1a
12724	6	1.62	Clcn2
12725	49	13.23	Clcn3
12727	79	21.33	Clcn4-2
12729	51	13.77	Clns1a
12747	128	34.55	Clk1
12748	4	1.08	Clk2
12750	124	33.47	Clk4
12751	487	131.47	Tpp1
12752	16	4.32	Cln3
12753	28	7.56	Clock
12757	575	155.22	Clta
12763	2	0.54	Cmah
12764	75	20.25	Cmas
12766	1	0.27	Cxcr3
12767	360	97.18	Cxcr4
12768	973	262.66	Ccr1
12769	13	3.51	Ccr9
12771	5	1.35	Ccr3
12772	26	7.02	Ccr2
12774	1001	270.22	Ccr5
12775	71	19.17	Ccr7
12785	236	63.71	Cnbp
12793	180	48.59	Cnih
12795	71	19.17	Plk3
12796	10	2.7	Camp
12798	49	13.23	Cnn2
12799	5	1.35	Cnp
12807	15	4.05	Hps3
12812	3	0.81	Coil
12819	9	2.43	Col15a1
12822	9	2.43	Col18a1
12823	363	97.99	Col19a1
12825	47	12.69	Col3a1
12826	9	2.43	Col4a1
12827	22	5.94	Col4a2
12831	5	1.35	Col5a1
12832	4	1.08	Col5a2
12833	2	0.54	Col6a1
12834	9	2.43	Col6a2
12837	75	20.25	Col8a1
12841	15	4.05	Col9a3
12842	27	7.29	Col1a1
12843	8	2.16	Col1a2
12845	3	0.81	Comp
12846	8	2.16	Comt1
12847	590	159.27	Copa
12848	202	54.53	Cops2
12850	16	4.32	Coq7
12857	871	235.13	Cox4i1
12858	267	72.08	Cox5a
12861	121	32.66	Cox6a1
12862	1	0.27	Cox6a2
12864	885	238.9	Cox6c
12865	7	1.89	Cox7a1
12868	364	98.26	Cox8a
12870	260	70.19	Cp
12877	3	0.81	Cpeb1
12892	41	11.07	Cpox
12894	143	38.6	Cpt1a
12896	30	8.1	Cpt2
12905	2	0.54	Cradd
12908	55	14.85	Crat
12909	66	17.82	Crcp
12912	38	10.26	Creb1
12913	67	18.09	Creb3
12914	16	4.32	Crebbp
12915	135	36.44	Atf6b
12916	22	5.94	Crem
12925	1291	348.5	Crip1
12927	15	4.05	Bcar1
12928	330	89.08	Crk
12929	11	2.97	Crkl
12934	144	38.87	Dpysl2
12945	1573	424.63	Dmbt1
12946	45	12.15	Cr1l
12952	64	17.28	Cry1
12953	15	4.05	Cry2
12954	24	6.48	Cryaa
12955	14	3.78	Cryab
12959	1	0.27	Cryba4
12960	2	0.54	Crybb1
12971	2	0.54	Crym
12972	1	0.27	Cryz
12974	217	58.58	Cs
12977	43	11.61	Csf1
12978	1620	437.32	Csf1r
12981	3	0.81	Csf2
12982	2326	627.9	Csf2ra
12983	5316	1435.05	Csf2rb
12984	1646	444.34	Csf2rb2
12985	398	107.44	Csf3
12986	20	5.4	Csf3r
12988	451	121.75	Csk
12994	1	0.27	Csn3
12995	55	14.85	Csnk2a1
13000	81	21.87	Csnk2a2
13001	560	151.17	Csnk2b
13002	69	18.63	Dnajc5
13003	140	37.79	Vcan
13006	22	5.94	Smc3
13007	76	20.52	Csrp1
13008	38	10.26	Csrp2
13010	6083	1642.1	Cst3
13011	31	8.37	Cst7
13014	4720	1274.16	Cstb
13017	2	0.54	Ctbp2
13018	95	25.65	Ctcf
13024	66	17.82	Ctla2a
13025	313	84.49	Ctla2b
13026	47	12.69	Pcyt1a
13030	52490	14169.6	Ctsb
13032	1571	424.09	Ctsc
13033	6771	1827.82	Ctsd
13034	18	4.86	Ctse
13036	723	195.17	Ctsh
13038	504	136.05	Ctsk
13039	22418	6051.71	Ctsl
13040	12058	3255.04	Ctss
13041	1	0.27	Ctsw
13043	5	1.35	Cttn
13046	26	7.02	Cugbp1
13047	75	20.25	Cux1
13057	1734	468.09	Cyba
13058	8879	2396.87	Cybb
13063	2	0.54	Cycs
13070	5	1.35	Cyp11a1
13076	2	0.54	Cyp1a1
13078	79	21.33	Cyp1b1
13110	1	0.27	Cyp2j6
13121	153	41.3	Cyp51
13132	1385	373.88	Dab2
13134	2	0.54	Dach1
13135	201	54.26	Dad1
13136	12	3.24	Cd55
13138	9	2.43	Dag1
13139	17	4.59	Dgka
13144	104	28.07	Dapk3
13163	506	136.59	Daxx
13169	369	99.61	Dbnl
13170	3	0.81	Dbp
13171	21	5.67	Dbt
13175	7	1.89	Dclk1
13177	19	5.13	Dci
13178	238	64.25	Dck
13179	22	5.94	Dcn
13185	61	16.47	Dscr3
13191	91	24.57	Dctn1
13194	104	28.07	Ddb1
13197	5	1.35	Gadd45a
13198	160	43.19	Ddit3
13199	1	0.27	Ddn
13200	102	27.53	Ddost
13202	123	33.2	Ddt
13204	761	205.43	Dhx15
13205	2	0.54	Ddx3x
13206	6	1.62	Ddx4
13207	3921	1058.47	Ddx5
13209	397	107.17	Ddx6
13211	327	88.27	Dhx9
13214	470	126.88	Defb1
13244	617	166.56	Degs1
13340	1	0.27	Slc29a2
13347	2	0.54	Dffa
13350	16	4.32	Dgat1
13353	1	0.27	Dgcr6
13356	39	10.53	Dgcr2
13358	59	15.93	Slc25a1
13360	6	1.62	Dhcr7
13361	13	3.51	Dhfr
13367	20	5.4	Diap1
13368	19	5.13	Dffb
13371	7	1.89	Dio2
13382	645	174.12	Dld
13385	2	0.54	Dlg4
13386	1	0.27	Dlk1
13401	10	2.7	Dmwd
13405	4	1.08	Dmd
13418	51	13.77	Dnajc1
13421	2	0.54	Dnase1l3
13423	29	7.83	Dnase2a
13424	24	6.48	Dync1h1
13427	319	86.11	Dync1i2
13429	132	35.63	Dnm1
13430	121	32.66	Dnm2
13433	6	1.62	Dnmt1
13434	11	2.97	Trdmt1
13435	222	59.93	Dnmt3a
13436	2	0.54	Dnmt3b
13437	34	9.18	Dnpep
13446	1	0.27	Doc2a
13448	28	7.56	Dok1
13449	17	4.59	Dok2
13476	236	63.71	Reep5
13478	123	33.2	Dpagt1
13480	74	19.98	Dpm1
13481	153	41.3	Dpm2
13482	2	0.54	Dpp4
13486	187	50.48	Dr1
13488	3	0.81	Drd1a
13494	74	19.98	Drg1
13495	20	5.4	Drg2
13496	64	17.28	Arid3a
13497	1	0.27	Drp2
13498	10	2.7	Atn1
13511	2	0.54	Dsg2
13518	10	2.7	Dst
13521	36	9.72	Slc26a2
13528	34	9.18	Dtnb
13537	85	22.95	Dusp2
13542	90	24.3	Dvl1
13543	30	8.1	Dvl2
13544	3	0.81	Dvl3
13548	149	40.22	Dyrk1a
13549	2	0.54	Dyrk1b
13555	12	3.24	E2f1
13557	71	19.17	E2f3
13559	128	34.55	E2f5
13560	20	5.4	E4f1
13589	490	132.27	Mapre1
13595	95	25.65	Ebp
13601	441	119.05	Ecm1
13603	4	1.08	Opn3
13612	4	1.08	Edil3
13614	1121	302.61	Edn1
13616	1	0.27	Edn3
13618	73	19.71	Ednrb
13619	2	0.54	Phc1
13626	89	24.03	Eed
13628	1	0.27	Eef1a2
13629	303	81.79	Eef2
13631	1	0.27	Eef2k
13640	2	0.54	Efna5
13641	3	0.81	Efnb1
13642	92	24.84	Efnb2
13645	1	0.27	Egf
13649	8	2.16	Egfr
13650	1	0.27	Rhbdf1
13653	39	10.53	Egr1
13654	140	37.79	Egr2
13660	4109	1109.22	Ehd1
13661	7	1.89	Ehf
13663	48	12.96	Ei24
13664	501	135.24	Eif1a
13665	16	4.32	Eif2s1
13667	4	1.08	Eif2b4
13669	625	168.72	Eif3a
13680	40	10.8	Ddx19a
13681	1581	426.79	Eif4a1
13682	14	3.78	Eif4a2
13685	563	151.98	Eif4ebp1
13688	12	3.24	Eif4ebp2
13690	1263	340.95	Eif4g2
13709	8	2.16	Elf1
13712	21	5.67	Elk1
13713	55	14.85	Elk3
13714	9	2.43	Elk4
13716	129	34.82	Ell
13722	110	29.69	Aimp1
13723	205	55.34	Emb
13726	10	2.7	Emd
13728	131	35.36	Mark2
13730	1854	500.48	Emp1
13731	9	2.43	Emp2
13732	365	98.53	Emp3
13733	750	202.46	Emr1
13800	1	0.27	Enah
13803	3	0.81	Enc1
13804	2	0.54	Endog
13805	40	10.8	Eng
13807	509	137.4	Eno2
13808	2	0.54	Eno3
13819	91	24.57	Epas1
13821	16	4.32	Epb4.1l1
13822	346	93.4	Epb4.1l2
13823	1	0.27	Epb4.1l3
13830	372	100.42	Stom
13831	141	38.06	Epc1
13835	1	0.27	Epha1
13838	114	30.77	Epha4
13841	2	0.54	Epha7
13849	12	3.24	Ephx1
13852	50	13.5	Stx2
13854	45	12.15	Epn1
13858	117	31.58	Eps15
13859	92	24.84	Eps15l1
13860	112	30.23	Eps8
13864	40	10.8	Nr2f6
13867	1	0.27	Erbb3
13870	35	9.45	Ercc1
13871	71	19.17	Ercc2
13872	45	12.15	Ercc3
13874	20	5.4	Ereg
13875	20	5.4	Erf
13885	3776	1019.33	Esd
13929	49	13.23	Amz2
13983	3	0.81	Esr2
13990	5	1.35	Smarcad1
13996	5	1.35	Etohd2
13998	85	22.95	Fgd6
14007	161	43.46	Cugbp2
14011	268	72.35	Etv6
14012	11	2.97	Mpzl2
14017	394	106.36	Evi2a
14020	52	14.04	Evi5
14030	120	32.39	Ewsr1
14038	17	4.59	Expi
14042	434	117.16	Ext1
14043	53	14.31	Ext2
14050	54	14.58	Eya3
14051	4	1.08	Eya4
14055	13	3.51	Ezh1
14056	36	9.72	Ezh2
14057	421	113.65	Sfxn1
14058	5803	1566.51	F10
14062	20	5.4	F2r
14064	3	0.81	F2rl2
14066	339	91.51	F3
14067	39	10.53	F5
14068	49	13.23	F7
14070	9	2.43	F8a
14071	3	0.81	F9
14073	1	0.27	Faah
14077	13	3.51	Fabp3
14081	870	234.86	Acsl1
14082	24	6.48	Fadd
14083	8	2.16	Ptk2
14084	24	6.48	Faf1
14085	9	2.43	Fah
14086	130	35.09	Fscn1
14087	12	3.24	Fanca
14088	4	1.08	Fancc
14089	2	0.54	Fap
14102	109	29.42	Fas
14104	21	5.67	Fasn
14105	106	28.61	Sfrs13a
14107	1	0.27	Fat1
14114	1	0.27	Fbln1
14115	2	0.54	Fbln2
14118	11	2.97	Fbn1
14121	2	0.54	Fbp1
14123	191	51.56	Fbrs
14125	2	0.54	Fcer1a
14127	2771	748.03	Fcer1g
14129	2551	688.64	Fcgr1
14130	6422	1733.61	Fcgr2b
14131	1606	433.54	Fcgr3
14132	326	88	Fcgrt
14133	173	46.7	Fcna
14137	33	8.91	Fdft1
14148	65	17.55	Fdx1
14151	67	18.09	Fech
14154	33	8.91	Fem1a
14155	217	58.58	Fem1b
14156	20	5.4	Fen1
14158	18	4.86	Fert2
14159	38	10.26	Fes
14168	1	0.27	Fgf13
14182	24	6.48	Fgfr1
14184	2	0.54	Fgfr3
14187	57	15.39	Akr1b8
14190	55	14.85	Fgl2
14191	198	53.45	Fgr
14194	9	2.43	Fh1
14198	1	0.27	Fhit
14208	80	21.6	Ppm1g
14218	11	2.97	Sh3pxd2a
14219	12	3.24	Ctgf
14221	1	0.27	Fjx1
14225	99	26.72	Fkbp1a
14226	22	5.94	Fkbp1b
14227	141	38.06	Fkbp2
14228	19	5.13	Fkbp4
14229	16	4.32	Fkbp5
14230	1	0.27	Fkbp10
14231	8	2.16	Fkbp7
14232	553	149.28	Fkbp8
14235	6	1.62	Foxm1
14236	125	33.74	Foxn2
14238	2	0.54	Foxf2
14247	21	5.67	Fli1
14248	654	176.55	Flii
14251	155	41.84	Flot1
14252	96	25.92	Flot2
14254	1	0.27	Flt1
14256	10	2.7	Flt3l
14257	1	0.27	Flt4
14260	30	8.1	Fmn1
14265	258	69.65	Fmr1
14268	1995	538.55	Fn1
14270	75	20.25	Srgap2
14275	1	0.27	Folr1
14276	331	89.35	Folr2
14281	291	78.56	Fos
14282	2	0.54	Fosb
14283	54	14.58	Fosl1
14284	1	0.27	Fosl2
14287	9	2.43	Fpgs
14289	1349	364.16	Fpr2
14293	491	132.54	Fpr1
14297	4	1.08	Fxn
14299	3	0.81	Freq
14300	145	39.14	Frg1
14313	24	6.48	Fst
14314	51	13.77	Fstl1
14319	45623	12315.9	Fth1
14339	34	9.18	Aktip
14345	1	0.27	Fut4
14356	55	14.85	Fxc1
14357	2	0.54	Dtx1
14359	69	18.63	Fxr1
14360	95	25.65	Fyn
14362	130	35.09	Fzd1
14367	35	9.45	Fzd5
14368	1	0.27	Fzd6
14369	207	55.88	Fzd7
14370	8	2.16	Fzd8
14371	1	0.27	Fzd9
14373	1	0.27	G0s2
14375	3	0.81	Xrcc6
14376	35	9.45	Ganab
14381	55	14.85	G6pdx
14385	7	1.89	Slc37a4
14387	134	36.17	Gaa
14388	25	6.75	Gab1
14389	53	14.31	Gab2
14390	165	44.54	Gabpa
14391	38	10.26	Gabpb1
14402	3	0.81	Gabrb3
14411	1	0.27	Slc6a12
14419	1	0.27	Gal
14420	74	19.98	Galc
14421	11	2.97	B4galnt1
14422	7	1.89	B4galnt2
14423	94	25.38	Galnt1
14425	2	0.54	Galnt3
14426	18	4.86	Galnt4
14430	13	3.51	Galt
14431	14	3.78	Gamt
14450	26	7.02	Gart
14455	6	1.62	Gas5
14456	18	4.86	Gas6
14457	717	193.55	Gas7
14461	2	0.54	Gata2
14465	4	1.08	Gata6
14466	668	180.33	Gba
14467	141	38.06	Gbas
14468	1089	293.97	Gbp1
14469	1671	451.08	Gbp2
14470	175	47.24	Rabac1
14479	63	17.01	Usp15
14489	2763	745.87	Mtpn
14528	684	184.64	Gch1
14533	164	44.27	Bloc1s1
14534	6	1.62	Kat2a
14536	6	1.62	Nr6a1
14537	8	2.16	Gcnt1
14538	41	11.07	Gcnt2
14544	99	26.72	Gda
14547	55	14.85	Gdap2
14548	72	19.44	Mrps33
14562	3	0.81	Gdf3
14566	2	0.54	Gdf9
14567	64	17.28	Gdi1
14569	527	142.26	Gdi2
14571	433	116.89	Gpd2
14579	243	65.6	Gem
14581	11	2.97	Gfi1
14583	205	55.34	Gfpt1
14584	17	4.59	Gfpt2
14586	1	0.27	Gfra2
14590	285	76.94	Ggh
14593	4	1.08	Ggps1
14594	830	224.06	Ggta1
14595	164	44.27	B4galt1
14600	1	0.27	Ghr
14605	43	11.61	Tsc22d3
14608	1	0.27	Gpr83
14609	48	12.96	Gja1
14619	2	0.54	Gjb2
14620	5	1.35	Gjb3
14621	2	0.54	Gjb4
14622	1	0.27	Gjb5
14628	202	54.53	Ostm1
14629	9	2.43	Gclc
14630	82	22.14	Gclm
14634	1	0.27	Gli3
14635	20	5.4	Galk1
14645	45	12.15	Glul
14651	1	0.27	Hagh
14659	10	2.7	Glrp1
14660	367	99.07	Gls
14661	752	203	Glud1
14667	772	208.4	Gm2a
14670	57	15.39	Gnal1
14672	12	3.24	Gna11
14673	1	0.27	Gna12
14674	750	202.46	Gna13
14676	33	8.91	Gna15
14677	1	0.27	Gnai1
14679	205	55.34	Gnai3
14680	2	0.54	Gnal
14682	213	57.5	Gnaq
14683	253	68.3	Gnas
14688	284	76.67	Gnb1
14693	429	115.81	Gnb2
14694	1169	315.57	Gnb2l1
14696	49	13.23	Gnb4
14700	160	43.19	Gng10
14702	106	28.61	Gng2
14705	50	13.5	Bscl2
14706	20	5.4	Gng4
14711	1	0.27	Gnmt
14712	25	6.75	Gnpat
14714	2	0.54	Gnrh1
14719	35	9.45	Got2
14724	2	0.54	Gp1bb
14725	1	0.27	Lrp2
14726	8766	2366.37	Pdpn
14727	11	2.97	Gp49a
14728	9183	2478.94	Lilrb4
14731	27	7.29	Gpaa1
14733	150	40.49	Gpc1
14734	3	0.81	Gpc3
14735	1	0.27	Gpc4
14739	73	19.71	S1pr2
14744	34	9.18	Gpr65
14745	46	12.42	Lpar1
14747	370	99.88	Cmklr1
14751	251	67.76	Gpi1
14755	1	0.27	Pigq
14756	1	0.27	Gpld1
14760	1	0.27	Gpr19
14766	64	17.28	Gpr56
14768	10	2.7	Lancl1
14773	22	5.94	Grk5
14775	1351	364.7	Gpx1
14778	18	4.86	Gpx3
14780	10	2.7	Gpx5
14784	1189	320.97	Grb2
14788	1	0.27	Gpr162
14790	113	30.5	Grcc10
14791	30	8.1	Emg1
14792	62	16.74	Lpcat3
14793	3	0.81	Cdca3
14794	54	14.58	Spsb2
14797	178	48.05	Aes
14809	2	0.54	Grik5
14815	474	127.96	Nr3c1
14824	6624	1788.14	Grn
14825	3122	842.78	Cxcl1
14827	747	201.65	Pdia3
14828	2907	784.74	Hspa5
14841	8	2.16	Gsg2
14852	620	167.37	Gspt1
14853	1	0.27	Gspt2
14854	4	1.08	Gss
14859	8	2.16	Gsta3
14860	2	0.54	Gsta4
14862	96	25.92	Gstm1
14865	16	4.32	Gstm4
14866	3	0.81	Gstm5
14870	1	0.27	Gstp1
14871	5	1.35	Gstt1
14872	39	10.53	Gstt2
14873	204	55.07	Gsto1
14874	3	0.81	Gstz1
14884	184	49.67	Gtf2h1
14885	18	4.86	Gtf2h4
14894	51	13.77	Gtl3
14897	309	83.41	Trip12
14904	30	8.1	Gtpbp1
14910	107	28.88	Gt(ROSA)26Sor
14911	54	14.58	Thumpd3
14913	33	8.91	Guca1a
14923	10	2.7	Guk1
14933	366	98.8	Gyk
14936	59	15.93	Gys1
14939	1	0.27	Gzmb
14950	176	47.51	H13
14958	8	2.16	H1f0
14960	66	17.82	H2-Aa
14962	2086	563.11	Cfb
14964	89	24.03	H2-D1
14968	1219	329.07	H2-Ea
14969	405	109.33	H2-Eb1
14977	129	34.82	Slc39a7
14979	41	11.07	H2-Ke6
14990	1	0.27	H2-M2
14991	5	1.35	H2-M3
14998	110	29.69	H2-DMa
15001	8	2.16	H2-Oa
15002	4	1.08	H2-Ob
15040	9	2.43	H2-T23
15042	84	22.68	H2-T24
15061	870	234.86	H28
15081	678	183.03	H3f3b
15107	12	3.24	Hadh
15108	26	7.02	Hsd17b10
15109	150	40.49	Hal
15112	1	0.27	Hao1
15114	1	0.27	Hap1
15115	58	15.66	Hars
15116	3	0.81	Has1
15117	2	0.54	Has2
15159	68	18.36	Hccs
15161	70	18.9	Hcfc1
15163	206	55.61	Hcls1
15170	143	38.6	Ptpn6
15182	43	11.61	Hdac2
15183	70	18.9	Hdac3
15184	15	4.05	Hdac5
15185	5	1.35	Hdac6
15186	24	6.48	Hdc
15191	56	15.12	Hdgf
15193	37	9.99	Hdgfrp2
15194	34	9.18	Htt
15199	34	9.18	Hebp1
15200	80	21.6	Hbegf
15201	6	1.62	Hells
15204	81	21.87	Herc2
15211	1065	287.5	Hexa
15212	962	259.69	Hexb
15216	54	14.58	Hfe
15220	1	0.27	Foxq1
15234	12	3.24	Hgf
15239	204	55.07	Hgs
15242	12	3.24	Hhex
15247	144	38.87	Hiat1
15248	1	0.27	Hic1
15251	1659	447.84	Hif1a
15254	326	88	Hint1
15258	17	4.59	Hipk2
15260	36	9.72	Hira
15273	88	23.76	Hivep2
15275	239	64.52	Hk1
15277	1024	276.43	Hk2
15278	11	2.97	Tfb2m
15284	37	9.99	Hlx
15312	94	25.38	Hmgn1
15353	47	12.69	Hmg20b
15356	103	27.8	Hmgcl
15357	338	91.24	Hmgcr
15364	5	1.35	Hmga2
15366	5	1.35	Hmmr
15368	1357	366.32	Hmox1
15369	542	146.31	Hmox2
15370	229	61.82	Nr4a1
15374	464	125.26	Hn1
15384	864	233.24	Hnrnpab
15388	246	66.41	Hnrnpl
15426	1	0.27	Hoxc8
15434	1	0.27	Hoxd3
15439	1803	486.72	Hp
15441	57	15.39	Hp1bp3
15442	205	55.34	Hpse
15450	1	0.27	Lipc
15451	1	0.27	Hpn
15452	256	69.11	Hprt1
15460	2	0.54	Hr
15461	76	20.52	Hras1
15463	302	81.52	Agfg1
15464	6	1.62	Hrc
15467	57	15.39	Eif2ak1
15468	68	18.36	Prmt2
15469	13	3.51	Prmt1
15481	15	4.05	Hspa8
15483	17	4.59	Hsd11b1
15488	168	45.35	Hsd17b4
15490	23	6.21	Hsd17b7
15499	48	12.96	Hsf1
15500	67	18.09	Hsf2
15502	144	38.87	Dnaja1
15505	57	15.39	Hsph1
15507	5	1.35	Hspb1
15510	1	0.27	Hspd1
15511	4	1.08	Hspa1b
15512	15	4.05	Hspa2
15516	1411	380.9	Hsp90ab1
15519	592	159.81	Hsp90aa1
15525	405	109.33	Hspa4
15526	247	66.68	Hspa9
15529	2	0.54	Sdc2
15530	2	0.54	Hspg2
15531	13	3.51	Ndst1
15547	24	6.48	Trmt2a
15558	1	0.27	Htr2a
15559	7	1.89	Htr2b
15566	14	3.78	Htr7
15568	318	85.84	Elavl1
15571	1	0.27	Elavl3
15574	3	0.81	Hus1
15586	29	7.83	Hyal1
15587	33	8.91	Hyal2
15874	254	68.57	Iapp
15894	323	87.19	Icam1
15896	6	1.62	Icam2
15900	182	49.13	Irf8
15901	25	6.75	Id1
15902	13212	3566.56	Id2
15903	184	49.67	Id3
15925	8	2.16	Ide
15926	63	17.01	Idh1
15929	56	15.12	Idh3g
15931	64	17.28	Ids
15932	10	2.7	Idua
15936	35	9.45	Ier2
15937	178	48.05	Ier3
15939	110	29.69	Ier5
15944	29	7.83	Irgm1
15950	178	48.05	Ifi203
15953	1107	298.83	Ifi47
15957	1520	410.32	Ifit1
15958	2521	680.54	Ifit2
15959	1091	294.51	Ifit3
15975	132	35.63	Ifnar1
15976	769	207.59	Ifnar2
15977	1	0.27	Ifnb1
15979	177	47.78	Ifngr1
15980	401	108.25	Ifngr2
15982	770	207.86	Ifrd1
15983	11	2.97	Ifrd2
15985	1	0.27	Cd79b
16000	431	116.35	Igf1
16001	26	7.02	Igf1r
16004	112	30.23	Igf2r
16007	6	1.62	Cyr61
16009	1	0.27	Igfbp3
16010	14	3.78	Igfbp4
16012	9	2.43	Igfbp6
16068	146	39.41	Il18bp
16069	2	0.54	Igj
16145	192	51.83	Igtp
16149	5775	1558.95	Cd74
16150	143	38.6	Ikbkb
16151	80	21.6	Ikbkg
16154	73	19.71	Il10ra
16155	1199	323.67	Il10rb
16159	603	162.78	Il12a
16160	5	1.35	Il12b
16162	1	0.27	Il12rb2
16164	261	70.46	Il13ra1
16165	4	1.08	Il13ra2
16168	151	40.76	Il15
16169	97	26.19	Il15ra
16170	1	0.27	Il16
16172	752	203	Il17ra
16173	395	106.63	Il18
16175	13596	3670.22	Il1a
16176	6159	1662.61	Il1b
16177	5	1.35	Il1r1
16178	3	0.81	Il1r2
16180	46	12.42	Il1rap
16181	8767	2366.64	Il1rn
16182	1	0.27	Il18r1
16184	1	0.27	Il2ra
16186	597	161.16	Il2rg
16188	33	8.91	Il3ra
16190	373	100.69	Il4ra
16192	1	0.27	Il5ra
16193	379	102.31	Il6
16195	29	7.83	Il6st
16197	2373	640.59	Il7r
16201	76	20.52	Ilf3
16202	156	42.11	Ilk
16205	5	1.35	Gimap1
16206	2	0.54	Lrig1
16210	61	16.47	Impact
16211	168	45.35	Kpnb1
16319	27	7.29	Incenp
16323	29	7.83	Inhba
16328	15	4.05	Cep250
16329	3	0.81	Inpp1
16330	124	33.47	Inpp5b
16331	23	6.21	Inpp5d
16332	153	41.3	Inppl1
16337	4	1.08	Insr
16341	4	1.08	Eif3e
16348	16	4.32	Invs
16362	820	221.36	Irf1
16363	190	51.29	Irf2
16364	8	2.16	Irf4
16365	2475	668.12	Irg1
16391	244	65.87	Irf9
16396	18	4.86	Itch
16398	1	0.27	Itga2
16399	1	0.27	Itga2b
16401	847	228.65	Itga4
16402	1789	482.94	Itga5
16403	37	9.99	Itga6
16404	3	0.81	Itga7
16407	1	0.27	Itgae
16408	92	24.84	Itgal
16409	3371	910	Itgam
16410	301	81.25	Itgav
16411	200	53.99	Itgax
16412	2354	635.46	Itgb1
16413	135	36.44	Itgb1bp1
16414	1530	413.02	Itgb2
16416	7	1.89	Itgb3
16418	256	69.11	Eif6
16419	66	17.82	Itgb5
16421	193	52.1	Itgb7
16423	1049	283.18	Cd47
16426	57	15.39	Itih3
16428	1	0.27	Itk
16430	185	49.94	Stt3a
16431	4	1.08	Itm2a
16432	8115	2190.63	Itm2b
16434	1	0.27	Itpa
16439	57	15.39	Itpr2
16440	5	1.35	Itpr3
16443	210	56.69	Itsn1
16449	35	9.45	Jag1
16451	1069	288.58	Jak1
16452	2839	766.38	Jak2
16453	21	5.67	Jak3
16456	10	2.7	F11r
16468	228	61.55	Jarid2
16469	4	1.08	Jrk
16475	2	0.54	Jub
16476	345	93.13	Jun
16477	755	203.81	Junb
16478	85	22.95	Jund
16480	8	2.16	Jup
16491	1	0.27	Kcna3
16497	1	0.27	Kcnab1
16498	25	6.75	Kcnab2
16500	32	8.64	Kcnb1
16504	1	0.27	Kcnc3
16514	1	0.27	Kcnj11
16518	41	11.07	Kcnj2
16522	1	0.27	Kcnj6
16532	1	0.27	Kcnu1
16534	45	12.15	Kcnn4
16538	1	0.27	Kcns1
16541	90	24.3	Napsa
16542	22	5.94	Kdr
16543	687	185.45	Mdfic
16548	3	0.81	Khk
16549	67	18.09	Khsrp
16551	1	0.27	Kif11
16553	18	4.86	Kif13a
16554	3	0.81	Kif13b
16558	12	3.24	Kif16b
16560	13	3.51	Kif1a
16561	69	18.63	Kif1b
16562	88	23.76	Kif1c
16563	52	14.04	Kif2a
16564	1	0.27	Kif21a
16565	65	17.55	Kif21b
16568	90	24.3	Kif3a
16569	68	18.36	Kif3b
16570	33	8.91	Kif3c
16571	1	0.27	Kif4
16574	1	0.27	Kif5c
16576	1	0.27	Kif7
16578	2	0.54	Kif9
16579	10	2.7	Kifap3
16582	1	0.27	Kifc3
16588	23	6.21	Kin
16590	7	1.89	Kit
16592	12	3.24	Fabp5
16593	3	0.81	Klc1
16594	9	2.43	Klc2
16597	3	0.81	Klf12
16598	1	0.27	Klf2
16599	1	0.27	Klf3
16600	11	2.97	Klf4
16601	28	7.56	Klf9
16613	1	0.27	Klk1b11
16621	2	0.54	Klkb1
16622	2	0.54	Klk1b5
16634	1	0.27	Klra3
16639	4	1.08	Klra8
16646	135	36.44	Kpna1
16648	729	196.79	Kpna3
16649	304	82.06	Kpna4
16650	40	10.8	Kpna6
16653	90	24.3	Kras
16656	85	22.95	Hivep3
16658	310	83.68	Mafb
16664	1	0.27	Krt14
16667	13	3.51	Krt17
16691	7	1.89	Krt8
16706	12	3.24	Ksr1
16709	26	7.02	Ktn1
16728	8	2.16	L1cam
16763	19	5.13	Lad1
16764	1	0.27	Aff3
16768	1	0.27	Lag3
16774	1	0.27	Lama3
16779	2	0.54	Lamb2
16783	2749	742.09	Lamp1
16784	1621	437.59	Lamp2
16785	8	2.16	Rpsa
16790	903	243.76	Anpep
16792	926	249.97	Laptm5
16795	24	6.48	Large
16796	554	149.55	Lasp1
16797	215	58.04	Lat
16798	133	35.9	Lats1
16800	155	41.84	Arhgef2
16801	106	28.61	Arhgef1
16803	14	3.78	Lbp
16816	9	2.43	Lcat
16818	5	1.35	Lck
16819	15	4.05	Lcn2
16822	1544	416.8	Lcp2
16825	63	17.01	Ldb1
16828	11287	3046.91	Ldha
16834	21	5.67	Cog1
16835	674	181.95	Ldlr
16847	2	0.54	Lepr
16848	224	60.47	Lfng
16852	1619	437.05	Lgals1
16854	265	71.54	Lgals3
16859	419	113.11	Lgals9
16865	10	2.7	Lgtn
16870	2	0.54	Lhx2
16875	1	0.27	Lhx8
16878	1	0.27	Lif
16880	6	1.62	Lifr
16881	4	1.08	Lig1
16882	12	3.24	Lig3
16885	40	10.8	Limk1
16886	4	1.08	Limk2
16889	624	168.45	Lipa
16890	11	2.97	Lipe
16891	13	3.51	Lipg
16897	48	12.96	Llgl1
16904	1	0.27	Gzmm
16905	737	198.95	Lmna
16906	11	2.97	Lmnb1
16907	40	10.8	Lmnb2
16909	109	29.42	Lmo2
16911	1263	340.95	Lmo4
16912	7	1.89	Psmb9
16913	273	73.7	Psmb8
16918	1	0.27	Mycl1
16922	105	28.34	Phyh
16924	1	0.27	Lnx1
16948	12	3.24	Lox
16949	2	0.54	Loxl1
16950	15	4.05	Loxl3
16952	1498	404.38	Anxa1
16956	793	214.07	Lpl
16969	193	52.1	Zbtb7a
16970	4	1.08	Lrmp
16971	557	150.36	Lrp1
16973	7	1.89	Lrp5
16974	1	0.27	Lrp6
16975	5	1.35	Lrp8
16976	219	59.12	Lrpap1
16978	207	55.88	Lrrfip1
16985	54	14.58	Lsp1
16987	46	12.42	Lss
16988	341	92.05	Lst1
16994	6	1.62	Ltb
16995	12	3.24	Ltb4r1
16997	13	3.51	Ltbp2
16998	79	21.33	Ltbp3
17000	273	73.7	Ltbr
17001	4	1.08	Ltc4s
17035	27	7.29	Lxn
17060	71	19.17	Blnk
17064	280	75.59	Cd93
17067	5	1.35	Ly6c1
17068	1	0.27	Ly6d
17069	1259	339.87	Ly6e
17076	1	0.27	Ly75
17079	249	67.22	Cd180
17082	17	4.59	Il1rl1
17083	53	14.31	Tmed1
17085	357	96.37	Ly9
17087	107	28.88	Ly96
17089	76	20.52	Lyar
17095	100	26.99	Lyl1
17101	7	1.89	Lyst
17105	2319	626.01	Lyz2
17110	65798	17762.1	Lyz1
17112	32	8.64	Tm4sf1
17113	305	82.33	M6pr
17117	1	0.27	Amacr
17118	2361	637.35	Marcks
17119	1015	274	Mxd1
17120	4	1.08	Mad1l1
17121	65	17.55	Mxd3
17122	23	6.21	Mxd4
17125	46	12.42	Smad1
17126	50	13.5	Smad2
17127	2	0.54	Smad3
17130	47	12.69	Smad6
17131	111	29.96	Smad7
17133	158	42.65	Maff
17135	119	32.12	Mafk
17136	13	3.51	Mag
17149	131	35.36	Magoh
17151	23	6.21	Ccndbp1
17155	161	43.46	Man1a
17156	51	13.77	Man1a2
17158	244	65.87	Man2a1
17159	180	48.59	Man2b1
17160	42	11.34	Man2b2
17161	30	8.1	Maoa
17164	3251	877.6	Mapkapk2
17165	146	39.41	Mapkapk5
17167	78	21.06	Marco
17168	10	2.7	Mare
17175	1	0.27	Masp2
17179	11	2.97	Matk
17181	1	0.27	Matn2
17184	185	49.94	Matr3
17188	66	17.82	Maz
17190	24	6.48	Mbd1
17191	453	122.29	Mbd2
17192	237	63.98	Mbd3
17193	1	0.27	Mbd4
17196	10	2.7	Mbp
17207	15	4.05	Mcf2l
17210	1058	285.61	Mcl1
17216	9	2.43	Mcm2
17217	40	10.8	Mcm4
17218	16	4.32	Mcm5
17219	13	3.51	Mcm6
17220	9	2.43	Mcm7
17222	182	49.13	Anapc1
17227	3	0.81	Mcpt4
17229	192	51.83	Tpsb2
17237	33	8.91	Mgrn1
17240	1	0.27	Mdfi
17242	11	2.97	Mdk
17245	3	0.81	Mdm1
17246	1152	310.98	Mdm2
17248	13	3.51	Mdm4
17250	205	55.34	Abcc1
17252	35	9.45	Rdh11
17254	173	46.7	Slc3a2
17256	114	30.77	Mea1
17257	96	25.92	Mecp2
17261	44	11.88	Mef2d
17263	1	0.27	Meg3
17268	1	0.27	Meis1
17274	135	36.44	Rab8a
17279	4	1.08	Melk
17281	23	6.21	Fyco1
17287	4	1.08	Mep1a
17289	12	3.24	Mertk
17294	1	0.27	Mest
17295	1505	406.27	Met
17299	3	0.81	Mettl1
17304	57	15.39	Mfge8
17305	1	0.27	Mfng
17308	231	62.36	Mgat1
17311	5	1.35	Kitl
17314	7	1.89	Mgmt
17318	47	12.69	Mid1
17342	1	0.27	Mitf
17344	65	17.55	Pias2
17345	205	55.34	Mki67
17346	48	12.96	Mknk1
17347	79	21.33	Mknk2
17350	4	1.08	Mlh1
17354	53	14.31	Mllt10
17355	346	93.4	Aff1
17356	71	19.17	Mllt4
17357	13351	3604.09	Marcksl1
17364	2	0.54	Trpm1
17381	1215	327.99	Mmp12
17384	2	0.54	Mmp10
17387	965	260.5	Mmp14
17391	4	1.08	Mmp24
17392	1	0.27	Mmp3
17394	287	77.48	Mmp8
17395	66	17.82	Mmp9
17420	14	3.78	Mnat1
17423	76	20.52	Ndst2
17425	19	5.13	Foxk1
17428	149	40.22	Mnt
17434	378	102.04	Mocs2
17448	542	146.31	Mdh2
17449	217	58.58	Mdh1
17454	97	26.19	Mov10
17470	548	147.93	Cd200
17472	19	5.13	Gbp4
17474	3447	930.51	Clec4d
17475	1	0.27	Mpdz
17476	14857	4010.63	Mpeg1
17524	593	160.08	Mpp1
17527	9	2.43	Mpv17
17528	1	0.27	Mpz
17532	2	0.54	Mras
17533	391	105.55	Mrc1
17535	18	4.86	Mre11a
17536	1	0.27	Meis2
17684	18	4.86	Cited2
17687	4	1.08	Msh5
17688	9	2.43	Msh6
17691	2	0.54	Sik1
17692	69	18.63	Msl3
17698	478	129.04	Msn
17713	158	42.65	Grpel1
17714	8	2.16	Grpel2
17750	4537	1224.76	Mt2
17755	3	0.81	Mtap1b
17758	465	125.53	Mtap4
17760	113	30.5	Mtap6
17761	2	0.54	Mtap7
17763	2	0.54	Mtcp1
17764	142	38.33	Mtf1
17765	89	24.03	Mtf2
17766	2	0.54	Nudt1
17768	150	40.49	Mthfd2
17769	214	57.77	Mthfr
17771	1	0.27	Mtl5
17772	309	83.41	Mtm1
17775	536	144.69	Laptm4a
17776	41	11.07	Mast2
17826	89	24.03	Mtvr2
17827	28	7.56	Mtx1
17828	41	11.07	Muted
17846	166	44.81	Commd1
17857	1186	320.16	Mx1
17858	218	58.85	Mx2
17859	118	31.85	Mxi1
17864	1	0.27	Mybl1
17868	24	6.48	Mybpc3
17872	104	28.07	Ppp1r15a
17873	93	25.11	Gadd45b
17874	76	20.52	Myd88
17876	43	11.61	Myef2
17886	125	33.74	Myh9
17909	101	27.26	Myo10
17912	56	15.12	Myo1b
17913	92	24.84	Myo1c
17916	15	4.05	Myo1f
17918	467	126.07	Myo5a
17920	2	0.54	Myo6
17925	358	96.64	Myo9b
17931	52	14.04	Ppp1r12a
17936	116	31.31	Nab1
17937	145	39.14	Nab2
17938	1011	272.92	Naca
17939	77	20.79	Naga
17940	3	0.81	Naip1
17948	3	0.81	Naip2
17952	9	2.43	Naip6
17954	3	0.81	Nap1l2
17955	51	13.77	Nap1l4
17965	29	7.83	Nbl1
17966	65	17.55	Nbr1
17969	750	202.46	Ncf1
17970	2	0.54	Ncf2
17972	2300	620.88	Ncf4
17973	727	196.25	Nck1
17975	221	59.66	Ncl
17978	24	6.48	Ncoa2
17979	214	57.77	Ncoa3
17988	495	133.62	Ndrg1
17991	365	98.53	Ndufa2
17992	370	99.88	Ndufa4
17995	54	14.58	Ndufv1
17996	1	0.27	Neb
17997	47	12.69	Nedd1
17999	17	4.59	Nedd4
18000	461	124.45	2010-09-02
18002	311	83.95	Nedd8
18003	6	1.62	Nedd9
18004	2	0.54	Nek1
18005	4	1.08	Nek2
18007	14	3.78	Neo1
18010	592	159.81	Neu1
18015	59	15.93	Nf1
18016	36	9.72	Nf2
18018	26	7.02	Nfatc1
18019	1	0.27	Nfatc2
18020	11	2.97	Nfatc2ip
18021	43	11.61	Nfatc3
18023	792	213.8	Nfe2l1
18024	98	26.45	Nfe2l2
18028	4	1.08	Nfib
18029	64	17.28	Nfic
18032	11	2.97	Nfix
18033	2478	668.93	Nfkb1
18035	5047	1362.43	Nfkbia
18036	219	59.12	Nfkbib
18037	461	124.45	Nfkbie
18038	24	6.48	Nfkbil1
18041	23	6.21	Nfs1
18044	125	33.74	Nfya
18045	147	39.68	Nfyb
18046	69	18.63	Nfyc
18073	5	1.35	Nid1
18074	2	0.54	Nid2
18080	96	25.92	Nin
18081	450	121.48	Ninj1
18082	4	1.08	Nipsnap1
18087	209	56.42	Nktr
18100	58	15.66	Mrpl40
18103	1	0.27	Nme2
18104	4	1.08	Nqo1
18105	31	8.37	Nqo2
18108	7	1.89	Nmt2
18114	296	79.9	Rrp1
18115	30	8.1	Nnt
18117	43	11.61	Cox4nb
18120	14	3.78	Mrpl49
18124	4	1.08	Nr4a3
18126	1427	385.22	Nos2
18127	3	0.81	Nos3
18128	469	126.61	Notch1
18129	43	11.61	Notch2
18130	11	2.97	Ints6
18133	7	1.89	Nov
18139	88	23.76	Zfml
18140	20	5.4	Uhrf1
18141	94	25.38	Nup50
18145	271	73.16	Npc1
18146	7	1.89	Npdc1
18160	3	0.81	Npr1
18173	31	8.37	Slc11a1
18174	3272	883.27	Slc11a2
18176	188	50.75	Nras
18181	38	10.26	Nrf1
18186	118	31.85	Nrp1
18187	1403	378.74	Nrp2
18193	50	13.5	Nsd1
18194	77	20.79	Nsdhl
18195	43	11.61	Nsf
18196	1	0.27	Nsg1
18201	7	1.89	Nsmaf
18203	212	57.23	Ntan1
18207	2	0.54	Nthl1
18209	2	0.54	Ntn3
18214	27	7.29	Ddr2
18218	1	0.27	Dusp8
18220	739	199.49	Nucb1
18222	6	1.62	Numb
18223	7	1.89	Numbl
18226	184	49.67	Nup62
18227	1	0.27	Nr4a2
18242	59	15.93	Oat
18293	69	18.63	Ogdh
18294	3	0.81	Ogg1
18301	39	10.53	Fxyd5
18302	12	3.24	Oit3
18383	5	1.35	Tnfrsf11b
18391	69	18.63	Sigmar1
18392	2	0.54	Orc1l
18393	12	3.24	Orc2l
18400	1	0.27	Slc22a18
18408	11	2.97	Slc25a15
18412	4223	1139.99	Sqstm1
18413	190	51.29	Osm
18414	19	5.13	Osmr
18415	7	1.89	Hspa4l
18430	1	0.27	Oxtr
18432	301	81.25	Mybbp1a
18436	2	0.54	P2rx1
18438	662	178.71	P2rx4
18439	48	12.96	P2rx7
18441	1	0.27	P2ry1
18442	446	120.4	P2ry2
18451	321	86.65	P4ha1
18452	30	8.1	P4ha2
18453	1687	455.4	P4hb
18457	107	28.88	Pldn
18472	266	71.81	Pafah1b1
18475	204	55.07	Pafah1b2
18476	13	3.51	Pafah1b3
18477	49	13.23	Prdx1
18479	41	11.07	Pak1
18483	54	14.58	Palm
18484	8	2.16	Pam
18507	1	0.27	Pax5
18515	56	15.12	Pbx2
18518	102	27.53	Igbp1
18519	34	9.18	Kat2b
18521	2	0.54	Pcbp2
18530	13	3.51	Pcdh8
18536	84	22.68	Pcm1
18537	72	19.44	Pcmt1
18541	15	4.05	Pcnt
18542	1	0.27	Pcolce
18549	6	1.62	Pcsk2
18550	668	180.33	Furin
18554	44	11.88	Pcsk7
18555	52	14.04	Pctk1
18557	6	1.62	Pctk3
18559	14	3.78	Pctp
18563	1	0.27	Pcx
18566	1	0.27	Pdcd1
18567	5	1.35	Pdcd2
18570	585	157.92	Pdcd6
18571	1770	477.81	Pdcd6ip
18572	15	4.05	Pdcd11
18574	183	49.4	Pde1b
18577	9	2.43	Pde4a
18582	38	10.26	Pde6d
18583	21	5.67	Pde7a
18590	22	5.94	Pdgfa
18591	112	30.23	Pdgfb
18596	20	5.4	Pdgfrb
18597	289	78.02	Pdha1
18602	8	2.16	Padi4
18605	17	4.59	Enpp1
18606	1	0.27	Enpp2
18607	254	68.57	Pdpk1
18611	255	68.84	Pea15a
18613	2	0.54	Pecam1
18618	1	0.27	Pemt
18619	191	51.56	Penk
18624	424	114.46	Pepd
18626	29	7.83	Per1
18627	10	2.7	Per2
18628	5	1.35	Per3
18631	4	1.08	Pex11a
18632	31	8.37	Pex11b
18633	27	7.29	Pex16
18634	14	3.78	Pex7
18636	1432	386.57	Cfp
18637	34	9.18	Pfdn2
18639	1	0.27	Pfkfb1
18640	37	9.99	Pfkfb2
18641	240	64.79	Pfkl
18642	2	0.54	Pfkm
18643	1134	306.12	Pfn1
18647	138	37.25	Pftk1
18648	2012	543.14	Pgam1
18654	2	0.54	Pgf
18669	18	4.86	Abcb1b
18671	5	1.35	Abcb1a
18674	14	3.78	Slc25a3
18679	5	1.35	Phka1
18685	8	2.16	Phtf1
18693	4	1.08	Pick1
18700	60	16.2	Piga
18701	6	1.62	Pigf
18704	73	19.71	Pik3c2a
18706	241	65.06	Pik3ca
18707	91	24.57	Pik3cd
18708	62	16.74	Pik3r1
18709	12	3.24	Pik3r2
18710	1	0.27	Pik3r3
18711	95	25.65	Pikfyve
18712	149	40.22	Pim1
18715	34	9.18	Pim2
18717	680	183.57	Pip5k1c
18718	94	25.38	Pip4k2a
18719	1	0.27	Pip5k1b
18720	29	7.83	Pip5k1a
18726	12	3.24	Pira3
18738	572	154.41	Pitpna
18739	29	7.83	Pitpnm1
18744	16	4.32	Pja1
18746	10	2.7	Pkm2
18747	63	17.01	Prkaca
18749	78	21.06	Prkacb
18750	10	2.7	Prkca
18751	128	34.55	Prkcb
18753	1764	476.19	Prkcd
18755	9	2.43	Prkch
18759	44	11.88	Prkci
18763	13	3.51	Pkd1
18764	44	11.88	Pkd2
18769	55	14.85	Pkig
18771	32	8.64	Pknox1
18772	1	0.27	Pkp1
18777	96	25.92	Lypla1
18779	1	0.27	Pla2r1
18782	1	0.27	Pla2g2d
18783	792	213.8	Pla2g4a
18786	160	43.19	Plaa
18787	987	266.44	Serpine1
18789	185	49.94	Papola
18791	5	1.35	Plat
18793	1218	328.8	Plaur
18795	8	2.16	Plcb1
18796	3	0.81	Plcb2
18797	91	24.57	Plcb3
18799	26	7.02	Plcd1
18805	30	8.1	Pld1
18806	42	11.34	Pld2
18807	663	178.98	Pld3
18810	158	42.65	Plec1
18813	99	26.72	Pa2g4
18817	3	0.81	Plk1
18822	86	23.22	Plod1
18826	620	167.37	Lcp1
18828	6	1.62	Plscr2
18830	317	85.57	Pltp
18844	713	192.47	Plxna1
18845	2	0.54	Plxna2
18854	321	86.65	Pml
18858	1328	358.49	Pmp22
18861	11	2.97	Pms2
18933	3	0.81	Prrx1
18949	102	27.53	Pnn
18950	5	1.35	Pnp1
18968	1	0.27	Pola1
18969	13	3.51	Pola2
18970	50	13.5	Polb
18971	10	2.7	Pold1
18972	2	0.54	Pold2
18974	6	1.62	Pole2
18975	15	4.05	Polg
18983	25	6.75	Cnot7
18984	1159	312.87	Por
18985	7	1.89	Pou2af1
18986	3	0.81	Pou2f1
18987	28	7.56	Pou2f2
19009	2	0.54	Pou6f1
19012	2	0.54	Ppap2a
19014	156	42.11	Med1
19015	79	21.33	Ppard
19016	19	5.13	Pparg
19018	43	11.61	Scand1
19024	56	15.12	Ppfibp2
19025	1388	374.69	Ctsa
19027	369	99.61	Sypl
19035	520	140.37	Ppib
19038	15	4.05	Ppic
19039	4226	1140.8	Lgals3bp
19042	72	19.44	Ppm1a
19043	7	1.89	Ppm1b
19044	32	8.64	Ppox
19045	176	47.51	Ppp1ca
19047	11	2.97	Ppp1cc
19052	657	177.36	Ppp2ca
19054	125	33.74	Ppp2r3d
19055	58	15.66	Ppp3ca
19057	12	3.24	Ppp3cc
19058	1035	279.4	Ppp3r1
19060	46	12.42	Ppp5c
19062	60	16.2	Inpp5k
19063	224	60.47	Ppt1
19069	135	36.44	Nup88
19070	217	58.58	Mobkl3
19072	99	26.72	Prep
19073	11987	3235.88	Srgn
19075	7	1.89	Prim1
19076	3	0.81	Prim2
19082	3	0.81	Prkag1
19084	773	208.67	Prkar1a
19085	9	2.43	Prkar1b
19087	1	0.27	Prkar2a
19088	39	10.53	Prkar2b
19089	80	21.6	Prkcsh
19090	10	2.7	Prkdc
19091	1	0.27	Prkg1
19092	1	0.27	Prkg2
19094	7	1.89	Mapk11
19106	418	112.84	Eif2ak2
19108	178	48.05	Prkx
19122	37	9.99	Prnp
19124	8	2.16	Procr
19125	1	0.27	Prodh
19126	2	0.54	Prom1
19128	108	29.15	Pros1
19134	62	16.74	Prpf4b
19139	45	12.15	Prps1
19141	846	228.38	Lgmn
19143	3	0.81	St14
19152	1	0.27	Prtn3
19153	2	0.54	Prx
19155	119	32.12	Npepps
19156	4470	1206.67	Psap
19157	66	17.82	Cyth1
19158	331	89.35	Cyth2
19159	454	122.56	Cyth3
19164	69	18.63	Psen1
19165	56	15.12	Psen2
19166	517	139.56	Psma2
19167	29	7.83	Psma3
19170	590	159.27	Psmb1
19171	1364	368.21	Psmb10
19172	846	228.38	Psmb4
19173	1	0.27	Psmb5
19175	391	105.55	Psmb6
19177	407	109.87	Psmb7
19179	5	1.35	Psmc1
19181	232	62.63	Psmc2
19182	117	31.58	Psmc3
19183	12	3.24	Psmc3ip
19184	358	96.64	Psmc5
19185	38	10.26	Psmd4
19186	5	1.35	Psme1
19188	1841	496.98	Psme2
19192	388	104.74	Psme3
19200	27	7.29	Pstpip1
19201	600	161.97	Pstpip2
19204	218	58.85	Ptafr
19205	312	84.22	Ptbp1
19211	265	71.54	Pten
19212	4	1.08	Pter
19217	5	1.35	Ptger2
19218	2	0.54	Ptger3
19219	19	5.13	Ptger4
19221	60	16.2	Ptgfrn
19222	19	5.13	Ptgir
19223	143	38.6	Ptgis
19224	24	6.48	Ptgs1
19225	1644	443.8	Ptgs2
19229	1165	314.49	Ptk2b
19230	183	49.4	Twf1
19243	112	30.23	Ptp4a1
19244	95	25.65	Ptp4a2
19245	12	3.24	Ptp4a3
19246	935	252.4	Ptpn1
19247	134	36.17	Ptpn11
19248	344	92.86	Ptpn12
19250	4	1.08	Ptpn14
19252	850	229.46	Dusp1
19253	31	8.37	Ptpn18
19255	318	85.84	Ptpn2
19258	2	0.54	Ptpn4
19260	5	1.35	Ptpn22
19262	317	85.57	Ptpra
19264	674	181.95	Ptprc
19265	10	2.7	Ptprcap
19266	3	0.81	Ptprd
19267	2396	646.8	Ptpre
19268	9	2.43	Ptprf
19270	3	0.81	Ptprg
19271	664	179.25	Ptprj
19274	18	4.86	Ptprm
19275	2	0.54	Ptprn
19277	109	29.42	Ptpro
19280	42	11.34	Ptprs
19285	6	1.62	Ptrf
19286	145	39.14	Pts
19294	7	1.89	Pvrl2
19298	38	10.26	Pex19
19299	81	21.87	Abcd3
19300	19	5.13	Abcd4
19301	3	0.81	Pxmp2
19302	3	0.81	Pxmp3
19303	6	1.62	Pxn
19305	49	13.23	Pex5
19309	5	1.35	Pygm
19317	736	198.68	Qk
19324	1508	407.08	Rab1
19325	946	255.37	Rab10
19326	357	96.37	Rab11b
19328	2	0.54	Rab12
19330	418	112.84	Rab18
19332	11	2.97	Rab20
19334	259	69.92	Rab22a
19335	5	1.35	Rab23
19336	121	32.66	Rab24
19337	2	0.54	Rab33a
19338	62	16.74	Rab33b
[truncated: 9,242 more rows]

## Sheet: M28.GeneExpression
Gene	GeneExpression	TPM(Gene)	Symbol
11302	5	1.37	Aatk
11303	286	78.54	Abca1
11305	44	12.08	Abca2
11306	21	5.77	Abcb7
11307	78	21.42	Abcg1
11308	520	142.8	Abi1
11350	22	6.04	Abl1
11352	19	5.22	Abl2
11363	270	74.15	Acadl
11364	5	1.37	Acadm
11370	51	14.01	Acadvl
11409	22	6.04	Acads
11416	70	19.22	Slc33a1
11421	1	0.27	Ace
11425	1	0.27	Apoc4
11426	507	139.23	Macf1
11428	4	1.1	Aco1
11429	181	49.7	Aco2
11430	125	34.33	Acox1
11431	2	0.55	Acp1
11433	1596	438.28	Acp5
11459	8	2.2	Acta1
11461	5161	1417.28	Actb
11475	12	3.3	Acta2
11477	19	5.22	Acvr1
11479	17	4.67	Acvr1b
11480	31	8.51	Acvr2a
11482	7	1.92	Acvrl1
11484	1	0.27	Aspa
11486	29	7.96	Ada
11487	174	47.78	Adam10
11489	2	0.55	Adam12
11490	480	131.81	Adam15
11491	1326	364.14	Adam17
11496	1	0.27	Adam22
11501	98	26.91	Adam8
11502	126	34.6	Adam9
11504	13	3.57	Adamts1
11512	8	2.2	Adcy6
11513	92	25.26	Adcy7
11515	3	0.82	Adcy9
11517	1	0.27	Adcyap1r1
11518	115	31.58	Add1
11520	274	75.24	Plin2
11532	330	90.62	Adh5
11534	36	9.89	Adk
11535	2	0.55	Adm
11538	80	21.97	Adnp
11540	113	31.03	Adora2a
11542	1	0.27	Adora3
11544	63	17.3	Adprh
11545	33	9.06	Parp1
11546	18	4.94	Parp2
11555	4	1.1	Adrb2
11564	90	24.72	Adsl
11565	181	49.7	Adssl1
11566	45	12.36	Adss
11568	1	0.27	Aebp1
11569	270	74.15	Aebp2
11576	10	2.75	Afp
11593	157	43.11	Aga
11596	6	1.65	Ager
11601	7	1.92	Angpt2
11603	341	93.64	Agrn
11605	177	48.61	Gla
11610	477	130.99	Agtrap
11622	36	9.89	Ahr
11624	54	14.83	Ahrr
11629	787	216.12	Aif1
11630	71	19.5	Aim1
11632	16	4.39	Aip
11636	6	1.65	Ak1
11637	13	3.57	Ak2
11640	1	0.27	Akap1
11641	7	1.92	Akap2
11647	1	0.27	Alpl
11655	144	39.54	Alas1
11658	713	195.8	Alcam
11666	4	1.1	Abcd1
11669	412	113.14	Aldh2
11671	27	7.41	Aldh3a2
11676	2	0.55	Aldoc
11677	140	38.45	Akr1b3
11687	47	12.91	Alox15
11689	7	1.92	Alox5
11690	90	24.72	Alox5ap
11692	34	9.34	Gfer
11698	3	0.82	Ambn
11699	1	0.27	Ambp
11717	419	115.06	Ampd3
11727	3	0.82	Ang
11732	39	10.71	Ank
11736	260	71.4	Ankfy1
11737	181	49.7	Anp32a
11739	117	32.13	Slc25a4
11740	802	220.24	Slc25a5
11744	1	0.27	Anxa11
11746	3866	1061.65	Anxa4
11747	1825	501.17	Anxa5
11749	298	81.83	Anxa6
11750	559	153.51	Anxa7
11752	3	0.82	Anxa8
11754	1	0.27	Aoc3
11757	109	29.93	Prdx3
11761	2	0.55	Aox1
11764	31	8.51	Ap1b1
11766	8	2.2	Ap1g2
11767	351	96.39	Ap1m1
11768	1	0.27	Ap1m2
11769	51	14.01	Ap1s1
11770	264	72.5	Fabp4
11771	86	23.62	Ap2a1
11772	35	9.61	Ap2a2
11773	537	147.47	Ap2m1
11774	328	90.07	Ap3b1
11776	1083	297.41	Ap3d1
11777	2	0.55	Ap3s1
11778	11	3.02	Ap3s2
11781	2	0.55	Ap4m1
11782	169	46.41	Ap4s1
11783	283	77.72	Apaf1
11785	1	0.27	Apbb1
11787	5	1.37	Apbb2
11792	10	2.75	Apex1
11793	81	22.24	Atg5
11796	749	205.69	Birc3
11797	8	2.2	Birc2
11798	143	39.27	Xiap
11799	6	1.65	Birc5
11800	241	66.18	Api5
11801	12	3.3	Cd5l
11804	233	63.98	Aplp2
11810	109	29.93	Apobec1
11812	27	7.41	Apoc1
11813	146	40.09	Apoc2
11816	19252	5286.85	Apoe
11819	3	0.82	Nr2f2
11820	2066	567.35	App
11821	147	40.37	Aprt
11834	45	12.36	Aqr
11836	68	18.67	Araf
11837	8	2.2	Rplp0
11838	1	0.27	Arc
11841	385	105.73	Arf2
11842	275	75.52	Arf3
11843	1055	289.72	Arf4
11844	10	2.75	Arf5
11845	2083	572.02	Arf6
11846	674	185.09	Arg1
11847	5072	1392.84	Arg2
11852	290	79.64	Rhob
11853	1513	415.49	Rhoc
11855	2	0.55	Arhgap5
11856	73	20.05	Arhgap6
11857	412	113.14	Arhgdib
11861	8	2.2	Arl4a
11863	314	86.23	Arnt
11864	1	0.27	Arnt2
11867	3792	1041.33	Arpc1b
11876	1	0.27	Artn
11877	3	0.82	Arvcf
11881	596	163.67	Arsb
11886	335	92	Asah1
11891	5	1.37	Rab27a
11898	37	10.16	Ass1
11906	21	5.77	Zfhx3
11907	36	9.89	Ate1
11909	270	74.15	Atf2
11910	374	102.71	Atf3
11911	489	134.29	Atf4
11920	6	1.65	Atm
11927	2327	639.03	Atox1
11928	811	222.71	Atp1a1
11931	1	0.27	Atp1b1
11933	621	170.53	Atp1b3
11936	2	0.55	Fxyd2
11938	269	73.87	Atp2a2
11946	1079	296.31	Atp5a1
11947	1704	467.94	Atp5b
11949	351	96.39	Atp5c1
11958	377	103.53	Atp5k
11964	859	235.89	Atp6v1a
11966	837	229.85	Atp6v1b2
11972	559	153.51	Atp6v0d1
11973	2128	584.38	Atp6v1e1
11974	505	138.68	Atp6v0e
11975	324	88.97	Atp6v0a1
11977	79	21.69	Atp7a
11980	25	6.87	Atp8a1
11981	5	1.37	Atp9a
11982	47	12.91	Atp10a
11983	484	132.91	Atpif1
11987	40	10.98	Slc7a1
11988	2361	648.36	Slc7a2
11990	41	11.26	Atrn
11991	507	139.23	Hnrnpd
11992	49	13.46	Auh
11993	166	45.59	Aup1
12006	2	0.55	Axin2
12010	208	57.12	B2m
12013	34	9.34	Bach1
12014	1	0.27	Bach2
12018	88	24.17	Bak1
12028	106	29.11	Bax
12033	145	39.82	Bcap29
12034	501	137.58	Phb2
12035	1	0.27	Bcat1
12036	36	9.89	Bcat2
12039	41	11.26	Bckdha
12041	22	6.04	Bckdk
12042	214	58.77	Bcl10
12043	24	6.59	Bcl2
12046	1	0.27	Bcl2a1c
12048	104	28.56	Bcl2l1
12050	18	4.94	Bcl2l2
12051	259	71.12	Bcl3
12053	205	56.3	Bcl6
12054	63	17.3	Bcl7b
12055	25	6.87	Bcl7c
12061	1	0.27	Bdkrb1
12068	44	12.08	Bet1
12070	111	30.48	Ngfrap1
12091	86	23.62	Glb1
12095	41	11.26	Bglap-rs1
12122	89	24.44	Bid
12125	127	34.88	Bcl2l11
12140	780	214.2	Fabp7
12142	29	7.96	Prdm1
12144	9	2.47	Blm
12145	6	1.65	Cxcr5
12151	19	5.22	Bmi1
12155	1	0.27	Bmp15
12156	20	5.49	Bmp2
12162	157	43.11	Bmp7
12166	4	1.1	Bmpr1a
12168	6	1.65	Bmpr2
12173	2	0.55	Bnc1
12175	1325	363.86	Bnip2
12177	329	90.35	Bnip3l
12180	1	0.27	Smyd1
12181	23	6.32	Bop1
12182	760	208.71	Bst1
12183	1	0.27	Bpgm
12192	42	11.53	Zfp36l1
12193	85	23.34	Zfp36l2
12211	314	86.23	Birc6
12215	325	89.25	Bsg
12217	3	0.82	Bsn
12223	2	0.55	Btc
12226	37	10.16	Btg1
12227	29	7.96	Btg2
12229	27	7.41	Btk
12234	6	1.65	Btrc
12235	3	0.82	Bub1
12236	3	0.82	Bub1b
12237	107	29.38	Bub3
12238	168	46.14	Commd3
12257	6269	1721.55	Tspo
12258	3	0.82	Serping1
12259	211	57.94	C1qa
12260	278	76.34	C1qb
12261	189	51.9	C1qbp
12262	43	11.81	C1qc
12263	17	4.67	C2
12265	3	0.82	Ciita
12266	1	0.27	C3
12267	2616	718.39	C3ar1
12279	6	1.65	C9
12282	56	15.38	Hyou1
12283	343	94.19	Cab39
12286	40	10.98	Cacna1a
12287	1	0.27	Cacna1b
12289	40	10.98	Cacna1d
12293	1	0.27	Cacna2d1
12295	5	1.37	Cacnb1
12297	20	5.49	Cacnb3
12298	1	0.27	Cacnb4
12301	361	99.14	Cacybp
12304	71	19.5	Pdia4
12305	1	0.27	Ddr1
12306	2526	693.67	Anxa2
12310	1	0.27	Calca
12311	3	0.82	Calcr
12313	2444	671.15	Calm1
12314	984	270.22	Calm2
12315	244	67.01	Calm3
12316	2	0.55	Aspm
12317	1243	341.34	Calr
12321	132	36.25	Calu
12326	2	0.55	Camk4
12328	25	6.87	Caml
12330	2565	704.38	Canx
12331	817	224.36	Cap1
12332	1476	405.33	Capg
12333	26	7.14	Capn1
12334	202	55.47	Capn2
12336	904	248.25	Capns1
12337	5	1.37	Capn5
12339	43	11.81	Capn7
12343	1309	359.47	Capza2
12345	532	146.09	Capzb
12349	15	4.12	Car2
12351	9	2.47	Car4
12352	8	2.2	Car5a
12359	29	7.96	Cat
12361	23	6.32	Cask
12366	4	1.1	Casp2
12367	1	0.27	Casp3
12368	12	3.3	Casp6
12369	134	36.8	Casp7
12370	411	112.87	Casp8
12371	14	3.84	Casp9
12373	161	44.21	Casq2
12380	168	46.14	Cast
12385	230	63.16	Ctnna1
12387	577	158.45	Ctnnb1
12388	95	26.09	Ctnnd1
12389	621	170.53	Cav1
12390	91	24.99	Cav2
12393	1	0.27	Runx2
12394	221	60.69	Runx1
12395	2	0.55	Runx1t1
12396	6	1.65	Cbfa2t2
12398	3	0.82	Cbfa2t3
12399	9	2.47	Runx3
12400	141	38.72	Cbfb
12406	10	2.75	Serpinh1
12408	24	6.59	Cbr1
12409	726	199.37	Cbr2
12416	1	0.27	Cbx2
12418	17	4.67	Cbx4
12419	16	4.39	Cbx5
12421	50	13.73	Rb1cc1
12428	28	7.69	Ccna2
12442	5	1.37	Ccnb2
12443	5	1.37	Ccnd1
12444	30	8.24	Ccnd2
12445	58	15.93	Ccnd3
12448	1	0.27	Ccne2
12449	9	2.47	Ccnf
12450	42	11.53	Ccng1
12452	90	24.72	Ccng2
12453	348	95.57	Ccni
12454	1	0.27	Ccnk
12460	38	10.44	Ccs
12461	300	82.38	Cct2
12462	149	40.92	Cct3
12464	58	15.93	Cct4
12465	203	55.75	Cct5
12466	214	58.77	Cct6a
12467	1	0.27	Cct6b
12468	85	23.34	Cct7
12469	321	88.15	Cct8
12475	625	171.63	Cd14
12476	83	22.79	Cd151
12478	11	3.02	Cd19
12481	2	0.55	Cd2
12482	7	1.92	Ms4a1
12483	2	0.55	Cd22
12484	872	239.46	Cd24a
12488	65	17.85	Cd2ap
12489	155	42.57	Cd33
12490	1	0.27	Cd34
12491	1107	304	Cd36
12492	904	248.25	Scarb2
12493	1126	309.21	Cd37
12494	2874	789.24	Cd38
12495	214	58.77	Entpd1
12497	5	1.37	Entpd6
12499	18	4.94	Entpd5
12502	2	0.55	Cd3g
12503	3	0.82	Cd247
12504	2	0.55	Cd4
12506	697	191.41	Cd48
12508	2274	624.47	Cd53
12509	4	1.1	Cd59a
12511	1	0.27	Cd6
12512	3369	925.17	Cd63
12514	22	6.04	Cd68
12515	160	43.94	Cd69
12517	21	5.77	Cd72
12518	1	0.27	Cd79a
12519	10	2.75	Cd80
12520	5	1.37	Cd81
12521	62	17.03	Cd82
12522	10	2.75	Cd83
12523	776	213.1	Cd84
12524	286	78.54	Cd86
12525	3	0.82	Cd8a
12527	293	80.46	Cd9
12530	7	1.92	Cdc25a
12532	3	0.82	Cdc25c
12534	21	5.77	Cdc2a
12537	23	6.32	Cdc2l1
12539	49	13.46	Cdc37
12540	1551	425.93	Cdc42
12544	1	0.27	Cdc45l
12545	6	1.65	Cdc7
12549	133	36.52	Cdgap
12552	11	3.02	Cdh11
12554	1	0.27	Cdh13
12557	1	0.27	Cdh17
12560	1	0.27	Cdh3
12562	10	2.75	Cdh5
12566	15	4.12	Cdk2
12568	11	3.02	Cdk5
12569	13	3.57	Cdk5r1
12571	18	4.94	Cdk6
12572	27	7.41	Cdk7
12575	61	16.75	Cdkn1a
12576	26	7.14	Cdkn1b
12577	3	0.82	Cdkn1c
12578	13	3.57	Cdkn2a
12579	1	0.27	Cdkn2b
12580	3	0.82	Cdkn2c
12585	27	7.41	Cdr2
12593	26	7.14	Cdyl
12606	258	70.85	Cebpa
12607	18	4.94	Cebpz
12608	1231	338.05	Cebpb
12609	313	85.95	Cebpd
12611	100	27.46	Cebpg
12613	1	0.27	Cel
12615	13	3.57	Cenpa
12616	114	31.31	Cenpb
12617	13	3.57	Cenpc1
12626	390	107.1	Cetn3
12628	1	0.27	Cfh
12632	25	6.87	Cfl2
12633	748	205.41	Cflar
12638	1	0.27	Cftr
12642	503	138.13	Ch25h
12648	167	45.86	Chd1
12652	1	0.27	Chga
12654	8	2.2	Chi3l1
12655	2690	738.71	Chi3l3
12660	26	7.14	Chka
12663	25	6.87	Chml
12675	30	8.24	Chuk
12696	18	4.94	Cirbp
12700	16	4.39	Cish
12702	1428	392.15	Socs3
12703	108	29.66	Socs1
12721	148	40.64	Coro1a
12724	12	3.3	Clcn2
12725	46	12.63	Clcn3
12727	39	10.71	Clcn4-2
12729	79	21.69	Clns1a
12747	258	70.85	Clk1
12748	5	1.37	Clk2
12750	222	60.96	Clk4
12751	316	86.78	Tpp1
12752	8	2.2	Cln3
12753	11	3.02	Clock
12757	619	169.99	Clta
12763	3	0.82	Cmah
12764	32	8.79	Cmas
12765	1	0.27	Il8rb
12767	150	41.19	Cxcr4
12768	587	161.2	Ccr1
12769	8	2.2	Ccr9
12771	3	0.82	Ccr3
12772	28	7.69	Ccr2
12774	636	174.65	Ccr5
12775	72	19.77	Ccr7
12785	183	50.25	Cnbp
12793	49	13.46	Cnih
12795	40	10.98	Plk3
12798	45	12.36	Cnn2
12799	9	2.47	Cnp
12807	11	3.02	Hps3
12808	1	0.27	Cobl
12812	13	3.57	Coil
12816	1	0.27	Col12a1
12819	24	6.59	Col15a1
12822	12	3.3	Col18a1
12823	216	59.32	Col19a1
12825	36	9.89	Col3a1
12826	9	2.47	Col4a1
12827	29	7.96	Col4a2
12830	2	0.55	Col4a5
12831	1	0.27	Col5a1
12832	9	2.47	Col5a2
12833	4	1.1	Col6a1
12834	4	1.1	Col6a2
12837	97	26.64	Col8a1
12841	4	1.1	Col9a3
12842	36	9.89	Col1a1
12843	16	4.39	Col1a2
12846	9	2.47	Comt1
12847	185	50.8	Copa
12848	116	31.86	Cops2
12850	6	1.65	Coq7
12857	1268	348.21	Cox4i1
12858	773	212.28	Cox5a
12861	107	29.38	Cox6a1
12862	4	1.1	Cox6a2
12864	1395	383.09	Cox6c
12865	3	0.82	Cox7a1
12868	901	247.43	Cox8a
12870	172	47.23	Cp
12874	1	0.27	Cpd
12890	1	0.27	Cplx2
12892	40	10.98	Cpox
12894	249	68.38	Cpt1a
12896	32	8.79	Cpt2
12905	2	0.55	Cradd
12908	133	36.52	Crat
12909	81	22.24	Crcp
12912	29	7.96	Creb1
12913	117	32.13	Creb3
12914	6	1.65	Crebbp
12915	93	25.54	Atf6b
12916	24	6.59	Crem
12925	1663	456.68	Crip1
12927	3	0.82	Bcar1
12928	415	113.96	Crk
12929	13	3.57	Crkl
12931	1	0.27	Crlf1
12934	157	43.11	Dpysl2
12945	2035	558.84	Dmbt1
12946	88	24.17	Cr1l
12952	87	23.89	Cry1
12953	15	4.12	Cry2
12954	30	8.24	Cryaa
12955	26	7.14	Cryab
12960	2	0.55	Crybb1
12972	4	1.1	Cryz
12974	316	86.78	Cs
12977	11	3.02	Csf1
12978	683	187.56	Csf1r
12981	8	2.2	Csf2
12982	1726	473.98	Csf2ra
12983	5487	1506.8	Csf2rb
12984	913	250.72	Csf2rb2
12985	898	246.6	Csf3
12986	17	4.67	Csf3r
12988	619	169.99	Csk
12995	58	15.93	Csnk2a1
13000	70	19.22	Csnk2a2
13001	159	43.66	Csnk2b
13002	92	25.26	Dnajc5
13003	130	35.7	Vcan
13006	15	4.12	Smc3
13007	213	58.49	Csrp1
13008	24	6.59	Csrp2
13010	11308	3105.33	Cst3
13011	44	12.08	Cst7
13014	2630	722.23	Cstb
13017	1	0.27	Ctbp2
13018	96	26.36	Ctcf
13024	105	28.83	Ctla2a
13025	387	106.28	Ctla2b
13026	64	17.58	Pcyt1a
13030	11286	3099.29	Ctsb
13032	3213	882.33	Ctsc
13033	8791	2414.13	Ctsd
13034	25	6.87	Ctse
13036	1483	407.25	Ctsh
13038	390	107.1	Ctsk
13039	29622	8134.59	Ctsl
13040	17850	4901.85	Ctss
13043	5	1.37	Cttn
13046	15	4.12	Cugbp1
13047	42	11.53	Cux1
13056	1	0.27	Cyb561
13057	1478	405.88	Cyba
13058	7013	1925.86	Cybb
13063	9	2.47	Cycs
13070	6	1.65	Cyp11a1
13076	1	0.27	Cyp1a1
13078	98	26.91	Cyp1b1
13079	1	0.27	Cyp21a1
13110	3	0.82	Cyp2j6
13121	93	25.54	Cyp51
13122	2	0.55	Cyp7a1
13123	1	0.27	Cyp7b1
13132	1018	279.56	Dab2
13134	5	1.37	Dach1
13135	259	71.12	Dad1
13136	13	3.57	Cd55
13138	5	1.37	Dag1
13139	8	2.2	Dgka
13144	43	11.81	Dapk3
13163	719	197.45	Daxx
13169	452	124.13	Dbnl
13170	1	0.27	Dbp
13171	23	6.32	Dbt
13175	9	2.47	Dclk1
13177	19	5.22	Dci
13178	173	47.51	Dck
13179	11	3.02	Dcn
13185	43	11.81	Dscr3
13191	88	24.17	Dctn1
13194	104	28.56	Ddb1
13197	18	4.94	Gadd45a
13198	142	39	Ddit3
13200	121	33.23	Ddost
13202	77	21.15	Ddt
13204	258	70.85	Dhx15
13205	3	0.82	Ddx3x
13206	8	2.2	Ddx4
13207	9738	2674.18	Ddx5
13209	672	184.54	Ddx6
13211	175	48.06	Dhx9
13214	334	91.72	Defb1
13244	705	193.6	Degs1
13340	2	0.55	Slc29a2
13345	1	0.27	Twist2
13346	2	0.55	Des
13347	4	1.1	Dffa
13350	11	3.02	Dgat1
13353	3	0.82	Dgcr6
13356	61	16.75	Dgcr2
13358	56	15.38	Slc25a1
13360	5	1.37	Dhcr7
13361	12	3.3	Dhfr
13367	19	5.22	Diap1
13368	32	8.79	Dffb
13371	10	2.75	Dio2
13382	587	161.2	Dld
13385	1	0.27	Dlg4
13386	6	1.65	Dlk1
13401	5	1.37	Dmwd
13405	3	0.82	Dmd
13418	42	11.53	Dnajc1
13421	6	1.65	Dnase1l3
13423	22	6.04	Dnase2a
13424	22	6.04	Dync1h1
13427	548	150.49	Dync1i2
13429	142	39	Dnm1
13430	152	41.74	Dnm2
13433	15	4.12	Dnmt1
13434	12	3.3	Trdmt1
13435	350	96.11	Dnmt3a
13437	28	7.69	Dnpep
13446	4	1.1	Doc2a
13448	24	6.59	Dok1
13449	21	5.77	Dok2
13476	299	82.11	Reep5
13478	200	54.92	Dpagt1
13480	78	21.42	Dpm1
13481	115	31.58	Dpm2
13482	1	0.27	Dpp4
13486	108	29.66	Dr1
13488	2	0.55	Drd1a
13494	41	11.26	Drg1
13495	21	5.77	Drg2
13496	33	9.06	Arid3a
13498	6	1.65	Atn1
13511	4	1.1	Dsg2
13518	3	0.82	Dst
13521	8	2.2	Slc26a2
13528	50	13.73	Dtnb
13537	49	13.46	Dusp2
13542	33	9.06	Dvl1
13543	32	8.79	Dvl2
13544	1	0.27	Dvl3
13548	234	64.26	Dyrk1a
13549	2	0.55	Dyrk1b
13555	19	5.22	E2f1
13557	43	11.81	E2f3
13559	57	15.65	E2f5
13560	8	2.2	E4f1
13589	270	74.15	Mapre1
13590	1	0.27	Lefty1
13591	1	0.27	Ebf1
13595	86	23.62	Ebp
13601	358	98.31	Ecm1
13603	16	4.39	Opn3
13612	2	0.55	Edil3
13614	907	249.07	Edn1
13618	70	19.22	Ednrb
13619	10	2.75	Phc1
13626	35	9.61	Eed
13628	1	0.27	Eef1a2
13629	240	65.91	Eef2
13631	1	0.27	Eef2k
13637	4	1.1	Efna2
13639	2	0.55	Efna4
13640	1	0.27	Efna5
13642	84	23.07	Efnb2
13649	6	1.65	Egfr
13650	14	3.84	Rhbdf1
13653	58	15.93	Egr1
13654	80	21.97	Egr2
13660	4363	1198.14	Ehd1
13661	3	0.82	Ehf
13663	105	28.83	Ei24
13664	400	109.85	Eif1a
13665	6	1.65	Eif2s1
13667	16	4.39	Eif2b4
13669	284	77.99	Eif3a
13680	42	11.53	Ddx19a
13681	2145	589.05	Eif4a1
13682	5	1.37	Eif4a2
13685	559	153.51	Eif4ebp1
13688	3	0.82	Eif4ebp2
13690	1014	278.46	Eif4g2
13709	2	0.55	Elf1
13712	39	10.71	Elk1
13713	46	12.63	Elk3
13714	6	1.65	Elk4
13716	111	30.48	Ell
13722	151	41.47	Aimp1
13723	245	67.28	Emb
13726	5	1.37	Emd
13728	166	45.59	Mark2
13730	1607	441.3	Emp1
13731	8	2.2	Emp2
13732	413	113.42	Emp3
13733	878	241.11	Emr1
13803	13	3.57	Enc1
13804	4	1.1	Endog
13805	17	4.67	Eng
13807	349	95.84	Eno2
13808	4	1.1	Eno3
13813	4	1.1	Eomes
13819	49	13.46	Epas1
13821	32	8.79	Epb4.1l1
13822	424	116.44	Epb4.1l2
13823	4	1.1	Epb4.1l3
13830	265	72.77	Stom
13831	123	33.78	Epc1
13835	1	0.27	Epha1
13838	118	32.4	Epha4
13841	2	0.55	Epha7
13849	38	10.44	Ephx1
13852	41	11.26	Stx2
13854	63	17.3	Epn1
13855	1	0.27	Epn2
13857	1	0.27	Epor
13858	139	38.17	Eps15
13859	82	22.52	Eps15l1
13860	32	8.79	Eps8
13864	104	28.56	Nr2f6
13866	1	0.27	Erbb2
13870	28	7.69	Ercc1
13871	82	22.52	Ercc2
13872	22	6.04	Ercc3
13874	18	4.94	Ereg
13875	18	4.94	Erf
13885	3754	1030.9	Esd
13929	23	6.32	Amz2
13982	1	0.27	Esr1
13983	4	1.1	Esr2
13990	3	0.82	Smarcad1
13992	1	0.27	Khdrbs3
13996	2	0.55	Etohd2
13998	109	29.93	Fgd6
14007	131	35.97	Cugbp2
14009	1	0.27	Etv1
14011	218	59.87	Etv6
14012	16	4.39	Mpzl2
14017	151	41.47	Evi2a
14020	46	12.63	Evi5
14030	176	48.33	Ewsr1
14038	43	11.81	Expi
14042	165	45.31	Ext1
14043	49	13.46	Ext2
14050	29	7.96	Eya3
14055	17	4.67	Ezh1
14056	14	3.84	Ezh2
14057	234	64.26	Sfxn1
14058	4492	1233.56	F10
14062	15	4.12	F2r
14064	4	1.1	F2rl2
14066	105	28.83	F3
14067	64	17.58	F5
14068	32	8.79	F7
14069	1	0.27	F8
14070	7	1.92	F8a
14071	1	0.27	F9
14077	8	2.2	Fabp3
14081	412	113.14	Acsl1
14082	17	4.67	Fadd
14083	10	2.75	Ptk2
14084	24	6.59	Faf1
14085	8	2.2	Fah
14086	201	55.2	Fscn1
14087	20	5.49	Fanca
14088	3	0.82	Fancc
14089	1	0.27	Fap
14102	112	30.76	Fas
14104	12	3.3	Fasn
14105	45	12.36	Sfrs13a
14107	1	0.27	Fat1
14114	1	0.27	Fbln1
14115	8	2.2	Fbln2
14118	11	3.02	Fbn1
14121	3	0.82	Fbp1
14123	261	71.67	Fbrs
14125	7	1.92	Fcer1a
14127	2441	670.33	Fcer1g
14129	1938	532.2	Fcgr1
14130	4922	1351.65	Fcgr2b
14131	923	253.47	Fcgr3
14132	495	135.93	Fcgrt
14133	214	58.77	Fcna
14137	48	13.18	Fdft1
14148	60	16.48	Fdx1
14151	41	11.26	Fech
14154	38	10.44	Fem1a
14155	290	79.64	Fem1b
14156	35	9.61	Fen1
14158	11	3.02	Fert2
14159	60	16.48	Fes
14163	1	0.27	Fgd1
14168	1	0.27	Fgf13
14178	1	0.27	Fgf7
14180	1	0.27	Fgf9
14182	42	11.53	Fgfr1
14184	6	1.65	Fgfr3
14187	106	29.11	Akr1b8
14190	40	10.98	Fgl2
14191	132	36.25	Fgr
14194	7	1.92	Fh1
14202	1	0.27	Fhl4
14204	2	0.55	Il4i1
14208	45	12.36	Ppm1g
14211	2	0.55	Smc2
14218	13	3.57	Sh3pxd2a
14219	21	5.77	Ctgf
14225	62	17.03	Fkbp1a
14226	36	9.89	Fkbp1b
14227	99	27.19	Fkbp2
14228	31	8.51	Fkbp4
14229	9	2.47	Fkbp5
14231	8	2.2	Fkbp7
14232	383	105.18	Fkbp8
14235	8	2.2	Foxm1
14236	77	21.15	Foxn2
14238	1	0.27	Foxf2
14239	1	0.27	Foxs1
14247	17	4.67	Fli1
14248	1241	340.8	Flii
14251	89	24.44	Flot1
14252	106	29.11	Flot2
14254	1	0.27	Flt1
14255	2	0.55	Flt3
14256	7	1.92	Flt3l
14257	5	1.37	Flt4
14260	15	4.12	Fmn1
14265	189	51.9	Fmr1
14268	3702	1016.62	Fn1
14270	61	16.75	Srgap2
14276	574	157.63	Folr2
14281	238	65.36	Fos
14283	17	4.67	Fosl1
14287	4	1.1	Fpgs
14289	1681	461.62	Fpr2
14293	656	180.15	Fpr1
14297	8	2.2	Fxn
14299	5	1.37	Freq
14300	64	17.58	Frg1
14313	69	18.95	Fst
14314	27	7.41	Fstl1
14319	55157	15146.8	Fth1
14339	24	6.59	Aktip
14348	1	0.27	Fut9
14356	33	9.06	Fxc1
14359	37	10.16	Fxr1
14360	57	15.65	Fyn
14362	150	41.19	Fzd1
14367	26	7.14	Fzd5
14369	323	88.7	Fzd7
14370	4	1.1	Fzd8
14375	12	3.3	Xrcc6
14376	49	13.46	Ganab
14381	94	25.81	G6pdx
14385	19	5.22	Slc37a4
14387	97	26.64	Gaa
14388	14	3.84	Gab1
14389	72	19.77	Gab2
14390	87	23.89	Gabpa
14391	24	6.59	Gabpb1
14411	1	0.27	Slc6a12
14412	2	0.55	Slc6a13
14420	59	16.2	Galc
14421	30	8.24	B4galnt1
14422	15	4.12	B4galnt2
14423	75	20.6	Galnt1
14425	1	0.27	Galnt3
14426	39	10.71	Galnt4
14430	16	4.39	Galt
14431	8	2.2	Gamt
14450	14	3.84	Gart
14453	1	0.27	Gas2
14455	20	5.49	Gas5
14456	29	7.96	Gas6
14457	731	200.74	Gas7
14460	2	0.55	Gata1
14461	1	0.27	Gata2
14462	1	0.27	Gata3
14465	4	1.1	Gata6
14466	951	261.16	Gba
14467	153	42.02	Gbas
14468	1070	293.84	Gbp1
14469	1386	380.61	Gbp2
14470	111	30.48	Rabac1
14479	53	14.55	Usp15
14489	2641	725.25	Mtpn
14525	1	0.27	Gcet2
14528	872	239.46	Gch1
14533	233	63.98	Bloc1s1
14534	10	2.75	Kat2a
14536	4	1.1	Nr6a1
14537	7	1.92	Gcnt1
14538	8	2.2	Gcnt2
14544	53	14.55	Gda
14547	40	10.98	Gdap2
14548	52	14.28	Mrps33
14555	1	0.27	Gpd1
14562	8	2.2	Gdf3
14566	2	0.55	Gdf9
14567	52	14.28	Gdi1
14569	312	85.68	Gdi2
14570	1	0.27	Arhgdig
14571	456	125.22	Gpd2
14579	85	23.34	Gem
14581	14	3.84	Gfi1
14582	3	0.82	Gfi1b
14583	89	24.44	Gfpt1
14584	3	0.82	Gfpt2
14590	226	62.06	Ggh
14593	7	1.92	Ggps1
14594	477	130.99	Ggta1
14595	174	47.78	B4galt1
14598	1	0.27	Ggt1
14600	3	0.82	Ghr
14605	42	11.53	Tsc22d3
14609	43	11.81	Gja1
14615	1	0.27	Gjc1
14619	2	0.55	Gjb2
14620	11	3.02	Gjb3
14622	2	0.55	Gjb5
14628	111	30.48	Ostm1
14630	39	10.71	Gclm
14634	2	0.55	Gli3
14635	22	6.04	Galk1
14645	74	20.32	Glul
14659	8	2.2	Glrp1
14660	172	47.23	Gls
14661	820	225.18	Glud1
14667	1038	285.05	Gm2a
14670	92	25.26	Gnal1
14672	14	3.84	Gna11
14674	657	180.42	Gna13
14676	45	12.36	Gna15
14677	1	0.27	Gnai1
14679	139	38.17	Gnai3
14680	4	1.1	Gnal
14682	119	32.68	Gnaq
14683	155	42.57	Gnas
14688	230	63.16	Gnb1
14693	1193	327.61	Gnb2
14694	1427	391.87	Gnb2l1
14696	16	4.39	Gnb4
14700	173	47.51	Gng10
14702	68	18.67	Gng2
14705	23	6.32	Bscl2
14706	12	3.3	Gng4
14708	1	0.27	Gng7
14712	21	5.77	Gnpat
14719	117	32.13	Got2
14726	4992	1370.87	Pdpn
14727	8	2.2	Gp49a
14728	11948	3281.08	Lilrb4
14731	19	5.22	Gpaa1
14732	2	0.55	Gpam
14733	170	46.68	Gpc1
14734	6	1.65	Gpc3
14735	1	0.27	Gpc4
14739	64	17.58	S1pr2
14744	15	4.12	Gpr65
14745	40	10.98	Lpar1
14747	834	229.03	Cmklr1
14751	412	113.14	Gpi1
14755	1	0.27	Pigq
14766	81	22.24	Gpr56
14768	8	2.2	Lancl1
14772	4	1.1	Grk4
14773	19	5.22	Grk5
14775	1205	330.91	Gpx1
14778	17	4.67	Gpx3
14780	10	2.75	Gpx5
14784	1114	305.92	Grb2
14790	224	61.51	Grcc10
14791	36	9.89	Emg1
14792	138	37.9	Lpcat3
14793	2	0.55	Cdca3
14794	192	52.73	Spsb2
14797	97	26.64	Aes
14814	1	0.27	Grin2d
14815	227	62.34	Nr3c1
14824	8191	2249.36	Grn
14825	3413	937.25	Cxcl1
14827	468	128.52	Pdia3
14828	3622	994.65	Hspa5
14841	1	0.27	Gsg2
14852	629	172.73	Gspt1
14853	4	1.1	Gspt2
14854	4	1.1	Gss
14859	13	3.57	Gsta3
14862	131	35.97	Gstm1
14865	10	2.75	Gstm4
14866	4	1.1	Gstm5
14870	1	0.27	Gstp1
14871	10	2.75	Gstt1
14872	102	28.01	Gstt2
14873	270	74.15	Gsto1
14874	12	3.3	Gstz1
14884	158	43.39	Gtf2h1
14885	15	4.12	Gtf2h4
14894	43	11.81	Gtl3
14897	168	46.14	Trip12
14904	47	12.91	Gtpbp1
14910	26	7.14	Gt(ROSA)26Sor
14911	28	7.69	Thumpd3
14913	41	11.26	Guca1a
14923	19	5.22	Guk1
14924	1	0.27	Magi1
14933	281	77.17	Gyk
14936	38	10.44	Gys1
14939	1	0.27	Gzmb
14950	428	117.53	H13
14955	1	0.27	H19
14957	1	0.27	Hist1h1d
14958	4	1.1	H1f0
14960	45	12.36	H2-Aa
14962	2382	654.13	Cfb
14964	82	22.52	H2-D1
14968	425	116.71	H2-Ea
14969	267	73.32	H2-Eb1
14977	117	32.13	Slc39a7
14979	97	26.64	H2-Ke6
14990	3	0.82	H2-M2
14991	1	0.27	H2-M3
14998	40	10.98	H2-DMa
15001	3	0.82	H2-Oa
15002	4	1.1	H2-Ob
15040	5	1.37	H2-T23
15042	73	20.05	H2-T24
15043	1	0.27	H2-T3
15061	1154	316.9	H28
15064	2	0.55	Mr1
15081	573	157.35	H3f3b
15107	14	3.84	Hadh
15108	9	2.47	Hsd17b10
15109	152	41.74	Hal
15115	57	15.65	Hars
15116	4	1.1	Has1
15117	2	0.55	Has2
15159	91	24.99	Hccs
15161	49	13.46	Hcfc1
15163	172	47.23	Hcls1
15170	301	82.66	Ptpn6
15182	43	11.81	Hdac2
15183	57	15.65	Hdac3
15184	24	6.59	Hdac5
15185	1	0.27	Hdac6
15186	10	2.75	Hdc
15191	63	17.3	Hdgf
15193	98	26.91	Hdgfrp2
15194	23	6.32	Htt
15199	74	20.32	Hebp1
15200	39	10.71	Hbegf
15201	2	0.55	Hells
15204	75	20.6	Herc2
15211	836	229.58	Hexa
15212	1813	497.87	Hexb
15213	1	0.27	Hey1
15216	63	17.3	Hfe
15234	1	0.27	Hgf
15239	341	93.64	Hgs
15242	19	5.22	Hhex
15247	51	14.01	Hiat1
15251	980	269.12	Hif1a
15254	162	44.49	Hint1
15258	8	2.2	Hipk2
15260	79	21.69	Hira
15273	63	17.3	Hivep2
15275	112	30.76	Hk1
15277	1311	360.02	Hk2
15278	8	2.2	Tfb2m
15284	8	2.2	Hlx
15312	154	42.29	Hmgn1
15353	42	11.53	Hmg20b
15356	73	20.05	Hmgcl
15357	313	85.95	Hmgcr
15364	1	0.27	Hmga2
15366	1	0.27	Hmmr
15368	700	192.23	Hmox1
15369	441	121.1	Hmox2
15370	187	51.35	Nr4a1
15374	842	231.22	Hn1
15384	466	127.97	Hnrnpab
15388	438	120.28	Hnrnpl
15426	1	0.27	Hoxc8
15430	1	0.27	Hoxd10
15439	3579	982.84	Hp
15441	62	17.03	Hp1bp3
15442	123	33.78	Hpse
15446	2	0.55	Hpgd
15450	6	1.65	Lipc
15451	5	1.37	Hpn
15452	275	75.52	Hprt1
15460	1	0.27	Hr
15461	66	18.12	Hras1
15463	300	82.38	Agfg1
15464	8	2.2	Hrc
15467	36	9.89	Eif2ak1
15468	71	19.5	Prmt2
15469	27	7.41	Prmt1
15476	1	0.27	Hs3st1
15481	10	2.75	Hspa8
15483	14	3.84	Hsd11b1
15484	1	0.27	Hsd11b2
15485	1	0.27	Hsd17b1
15488	84	23.07	Hsd17b4
15490	17	4.67	Hsd17b7
15499	49	13.46	Hsf1
15500	137	37.62	Hsf2
15502	130	35.7	Dnaja1
15504	1	0.27	Dnajb3
15505	69	18.95	Hsph1
15507	7	1.92	Hspb1
15510	1	0.27	Hspd1
15511	16	4.39	Hspa1b
15512	7	1.92	Hspa2
15516	955	262.26	Hsp90ab1
15519	608	166.96	Hsp90aa1
15525	453	124.4	Hspa4
15526	284	77.99	Hspa9
15529	1	0.27	Sdc2
15531	11	3.02	Ndst1
15547	11	3.02	Trmt2a
15559	14	3.84	Htr2b
15560	1	0.27	Htr2c
15566	6	1.65	Htr7
15567	3	0.82	Slc6a4
15568	152	41.74	Elavl1
15571	2	0.55	Elavl3
15574	13	3.57	Hus1
15586	21	5.77	Hyal1
15587	19	5.22	Hyal2
15874	375	102.98	Iapp
15894	501	137.58	Icam1
15896	29	7.96	Icam2
15900	177	48.61	Irf8
15901	16	4.39	Id1
15902	7965	2187.29	Id2
15903	312	85.68	Id3
15925	5	1.37	Ide
15926	54	14.83	Idh1
15929	62	17.03	Idh3g
15931	98	26.91	Ids
15932	1	0.27	Idua
15936	42	11.53	Ier2
15937	999	274.34	Ier3
15939	60	16.48	Ier5
15944	12	3.3	Irgm1
15950	207	56.84	Ifi203
15953	1220	335.03	Ifi47
15957	1560	428.4	Ifit1
15958	1163	319.38	Ifit2
15959	2458	675	Ifit3
15975	101	27.74	Ifnar1
15976	569	156.25	Ifnar2
15977	2	0.55	Ifnb1
15979	122	33.5	Ifngr1
15980	195	53.55	Ifngr2
15982	283	77.72	Ifrd1
15983	19	5.22	Ifrd2
15985	5	1.37	Cd79b
16000	234	64.26	Igf1
16001	40	10.98	Igf1r
16004	117	32.13	Igf2r
16007	4	1.1	Cyr61
16009	1	0.27	Igfbp3
16010	10	2.75	Igfbp4
16012	5	1.37	Igfbp6
16068	113	31.03	Il18bp
16145	282	77.44	Igtp
16149	16803	4614.33	Cd74
16150	84	23.07	Ikbkb
16151	102	28.01	Ikbkg
16154	29	7.96	Il10ra
16155	821	225.46	Il10rb
16159	523	143.62	Il12a
16160	3	0.82	Il12b
16163	1	0.27	Il13
16164	101	27.74	Il13ra1
16168	201	55.2	Il15
16169	74	20.32	Il15ra
16170	3	0.82	Il16
16172	670	183.99	Il17ra
16173	779	213.92	Il18
16175	25243	6932.06	Il1a
16176	5255	1443.09	Il1b
16177	1	0.27	Il1r1
16178	4	1.1	Il1r2
16180	51	14.01	Il1rap
16181	7464	2049.71	Il1rn
16182	1	0.27	Il18r1
16184	8	2.2	Il2ra
16186	1331	365.51	Il2rg
16188	37	10.16	Il3ra
16189	3	0.82	Il4
16190	697	191.41	Il4ra
16193	244	67.01	Il6
16194	4	1.1	Il6ra
16195	17	4.67	Il6st
16196	1	0.27	Il7
16197	3175	871.9	Il7r
16201	40	10.98	Ilf3
16202	342	93.92	Ilk
16206	2	0.55	Lrig1
16210	65	17.85	Impact
16211	81	22.24	Kpnb1
16319	26	7.14	Incenp
16323	21	5.77	Inhba
16328	24	6.59	Cep250
16329	4	1.1	Inpp1
16330	17	4.67	Inpp5b
16331	24	6.59	Inpp5d
16332	112	30.76	Inppl1
16337	12	3.3	Insr
16341	2	0.55	Eif3e
16348	30	8.24	Invs
16351	5	1.37	Ipp
16362	2324	638.2	Irf1
16363	425	116.71	Irf2
16364	29	7.96	Irf4
16365	3771	1035.57	Irg1
16391	370	101.61	Irf9
16396	4	1.1	Itch
16399	3	0.82	Itga2b
16401	353	96.94	Itga4
16402	889	244.13	Itga5
16403	21	5.77	Itga6
16404	2	0.55	Itga7
16408	54	14.83	Itgal
16409	1579	433.61	Itgam
16410	232	63.71	Itgav
16411	349	95.84	Itgax
16412	1472	404.23	Itgb1
16413	35	9.61	Itgb1bp1
16414	687	188.66	Itgb2
16416	4	1.1	Itgb3
16418	476	130.72	Eif6
16419	70	19.22	Itgb5
16421	124	34.05	Itgb7
16423	1115	306.19	Cd47
16426	65	17.85	Itih3
16428	3	0.82	Itk
16430	92	25.26	Stt3a
16431	1	0.27	Itm2a
16432	12704	3488.69	Itm2b
16439	135	37.07	Itpr2
16440	3	0.82	Itpr3
16443	206	56.57	Itsn1
16447	1	0.27	Ivl
16449	47	12.91	Jag1
16451	398	109.3	Jak1
16452	2228	611.84	Jak2
16453	17	4.67	Jak3
16456	6	1.65	F11r
16468	192	52.73	Jarid2
16469	5	1.37	Jrk
16476	337	92.54	Jun
16477	530	145.55	Junb
16478	147	40.37	Jund
16480	11	3.02	Jup
16497	1	0.27	Kcnab1
16498	27	7.41	Kcnab2
16500	63	17.3	Kcnb1
16514	1	0.27	Kcnj11
16518	74	20.32	Kcnj2
16534	37	10.16	Kcnn4
16541	52	14.28	Napsa
16542	9	2.47	Kdr
16543	818	224.63	Mdfic
16548	5	1.37	Khk
16549	62	17.03	Khsrp
16551	1	0.27	Kif11
16553	22	6.04	Kif13a
16558	25	6.87	Kif16b
16559	1	0.27	Kif17
16560	6	1.65	Kif1a
16561	54	14.83	Kif1b
16562	53	14.55	Kif1c
16563	49	13.46	Kif2a
16564	1	0.27	Kif21a
16565	61	16.75	Kif21b
16568	49	13.46	Kif3a
16569	68	18.67	Kif3b
16570	29	7.96	Kif3c
16574	4	1.1	Kif5c
16579	23	6.32	Kifap3
16582	6	1.65	Kifc3
16588	27	7.41	Kin
16589	1	0.27	Uhmk1
16590	3	0.82	Kit
16592	16	4.39	Fabp5
16593	5	1.37	Klc1
16594	23	6.32	Klc2
16598	4	1.1	Klf2
16599	1	0.27	Klf3
16600	1	0.27	Klf4
16601	34	9.34	Klf9
16613	1	0.27	Klk1b11
16621	1	0.27	Klkb1
16646	65	17.85	Kpna1
16648	264	72.5	Kpna3
16649	349	95.84	Kpna4
16650	65	17.85	Kpna6
16651	1	0.27	Sspn
16653	228	62.61	Kras
16656	105	28.83	Hivep3
16658	346	95.02	Mafb
16664	2	0.55	Krt14
16667	10	2.75	Krt17
16668	1	0.27	Krt18
16691	5	1.37	Krt8
16706	4	1.1	Ksr1
16709	21	5.77	Ktn1
16728	6	1.65	L1cam
16763	46	12.63	Lad1
16768	1	0.27	Lag3
16774	1	0.27	Lama3
16775	2	0.55	Lama4
16777	2	0.55	Lamb1-1
16782	3	0.82	Lamc2
16783	1590	436.64	Lamp1
16784	1223	335.85	Lamp2
16785	2	0.55	Rpsa
16790	717	196.9	Anpep
16792	802	220.24	Laptm5
16795	38	10.44	Large
16796	532	146.09	Lasp1
16797	94	25.81	Lat
16798	53	14.55	Lats1
16800	301	82.66	Arhgef2
16801	63	17.3	Arhgef1
16803	7	1.92	Lbp
16816	9	2.47	Lcat
16818	3	0.82	Lck
16819	5	1.37	Lcn2
16822	2023	555.54	Lcp2
16825	46	12.63	Ldb1
16828	11244	3087.75	Ldha
16834	23	6.32	Cog1
16835	573	157.35	Ldlr
16848	50	13.73	Lfng
16852	5510	1513.12	Lgals1
16854	178	48.88	Lgals3
16859	706	193.88	Lgals9
16865	36	9.89	Lgtn
16870	5	1.37	Lhx2
16878	2	0.55	Lif
16880	16	4.39	Lifr
16881	3	0.82	Lig1
16882	22	6.04	Lig3
16885	65	17.85	Limk1
16886	11	3.02	Limk2
16889	288	79.09	Lipa
16890	16	4.39	Lipe
16891	10	2.75	Lipg
16897	37	10.16	Llgl1
16905	1191	327.06	Lmna
16906	4	1.1	Lmnb1
16907	27	7.41	Lmnb2
16909	117	32.13	Lmo2
16911	1502	412.47	Lmo4
16912	11	3.02	Psmb9
16913	153	42.02	Psmb8
16922	48	13.18	Phyh
16948	15	4.12	Lox
16949	2	0.55	Loxl1
16950	20	5.49	Loxl3
16952	1604	440.48	Anxa1
16956	324	88.97	Lpl
16969	129	35.43	Zbtb7a
16970	2	0.55	Lrmp
16971	289	79.36	Lrp1
16973	3	0.82	Lrp5
16974	3	0.82	Lrp6
16975	8	2.2	Lrp8
16976	617	169.44	Lrpap1
16978	125	34.33	Lrrfip1
16985	84	23.07	Lsp1
16987	56	15.38	Lss
16988	448	123.03	Lst1
16992	1	0.27	Lta
16993	1	0.27	Lta4h
16994	11	3.02	Ltb
16995	5	1.37	Ltb4r1
16997	15	4.12	Ltbp2
16998	131	35.97	Ltbp3
17000	412	113.14	Ltbr
17001	2	0.55	Ltc4s
17025	1	0.27	Alad
17035	33	9.06	Lxn
17060	48	13.18	Blnk
17064	380	104.35	Cd93
17067	3	0.82	Ly6c1
17069	2870	788.14	Ly6e
17075	1	0.27	Epcam
17079	196	53.82	Cd180
17082	32	8.79	Il1rl1
17083	61	16.75	Tmed1
17085	171	46.96	Ly9
17087	38	10.44	Ly96
17089	109	29.93	Lyar
17095	68	18.67	Lyl1
17101	3	0.82	Lyst
17105	1282	352.05	Lyz2
17110	48995	13454.7	Lyz1
17112	15	4.12	Tm4sf1
17113	327	89.8	M6pr
17117	1	0.27	Amacr
17118	1012	277.91	Marcks
17119	1041	285.87	Mxd1
17120	6	1.65	Mad1l1
17121	58	15.93	Mxd3
17122	31	8.51	Mxd4
17125	14	3.84	Smad1
17126	43	11.81	Smad2
17127	4	1.1	Smad3
17130	15	4.12	Smad6
17131	73	20.05	Smad7
17133	105	28.83	Maff
17135	203	55.75	Mafk
17136	5	1.37	Mag
17149	51	14.01	Magoh
17151	22	6.04	Ccndbp1
17155	190	52.18	Man1a
17156	44	12.08	Man1a2
17158	222	60.96	Man2a1
17159	228	62.61	Man2b1
17160	98	26.91	Man2b2
17161	18	4.94	Maoa
17164	3325	913.09	Mapkapk2
17165	54	14.83	Mapkapk5
17167	188	51.63	Marco
17168	4	1.1	Mare
17179	28	7.69	Matk
17181	2	0.55	Matn2
17184	160	43.94	Matr3
17188	31	8.51	Maz
17190	21	5.77	Mbd1
17191	247	67.83	Mbd2
17192	61	16.75	Mbd3
17196	13	3.57	Mbp
17207	23	6.32	Mcf2l
17210	663	182.07	Mcl1
17216	10	2.75	Mcm2
17217	20	5.49	Mcm4
17218	4	1.1	Mcm5
17219	18	4.94	Mcm6
17220	8	2.2	Mcm7
17222	160	43.94	Anapc1
17225	1	0.27	Mcpt2
17229	71	19.5	Tpsb2
17237	32	8.79	Mgrn1
17242	1	0.27	Mdk
17245	10	2.75	Mdm1
17246	743	204.04	Mdm2
17248	3	0.82	Mdm4
17250	236	64.81	Abcc1
17252	21	5.77	Rdh11
17254	168	46.14	Slc3a2
17256	213	58.49	Mea1
17257	74	20.32	Mecp2
17261	28	7.69	Mef2d
17263	4	1.1	Meg3
17268	1	0.27	Meis1
17274	107	29.38	Rab8a
17279	2	0.55	Melk
17281	24	6.59	Fyco1
17287	5	1.37	Mep1a
17289	6	1.65	Mertk
17294	2	0.55	Mest
17295	1636	449.27	Met
17299	5	1.37	Mettl1
17304	17	4.67	Mfge8
17305	1	0.27	Mfng
17308	534	146.64	Mgat1
17311	2	0.55	Kitl
17314	3	0.82	Mgmt
17318	63	17.3	Mid1
17329	2	0.55	Cxcl9
17330	1	0.27	Minpp1
17344	58	15.93	Pias2
17345	233	63.98	Mki67
17346	33	9.06	Mknk1
17347	88	24.17	Mknk2
17349	1	0.27	Mlf1
17350	2	0.55	Mlh1
17354	81	22.24	Mllt10
17355	259	71.12	Aff1
17356	44	12.08	Mllt4
17357	6188	1699.31	Marcksl1
17364	2	0.55	Trpm1
17381	1194	327.89	Mmp12
17384	1	0.27	Mmp10
17387	1124	308.67	Mmp14
17390	9	2.47	Mmp2
17391	3	0.82	Mmp24
17394	199	54.65	Mmp8
17395	53	14.55	Mmp9
17420	17	4.67	Mnat1
17423	47	12.91	Ndst2
17425	14	3.84	Foxk1
17428	256	70.3	Mnt
17434	397	109.02	Mocs2
17448	407	111.77	Mdh2
17449	297	81.56	Mdh1
17454	104	28.56	Mov10
17470	211	57.94	Cd200
17472	12	3.3	Gbp4
17474	1289	353.98	Clec4d
17476	18810	5165.48	Mpeg1
17523	1	0.27	Mpo
17524	304	83.48	Mpp1
17527	17	4.67	Mpv17
17532	2	0.55	Mras
17533	241	66.18	Mrc1
17535	16	4.39	Mre11a
17536	2	0.55	Meis2
17684	30	8.24	Cited2
17687	3	0.82	Msh5
17688	5	1.37	Msh6
17692	14	3.84	Msl3
17698	239	65.63	Msn
17713	98	26.91	Grpel1
17714	3	0.82	Grpel2
17750	5973	1640.26	Mt2
17755	4	1.1	Mtap1b
17758	923	253.47	Mtap4
17760	163	44.76	Mtap6
17761	3	0.82	Mtap7
17764	110	30.21	Mtf1
17765	100	27.46	Mtf2
17766	1	0.27	Nudt1
17768	79	21.69	Mthfd2
17769	126	34.6	Mthfr
17771	1	0.27	Mtl5
17772	180	49.43	Mtm1
17775	501	137.58	Laptm4a
17776	69	18.95	Mast2
17777	2	0.55	Mttp
17826	76	20.87	Mtvr2
17827	71	19.5	Mtx1
17828	95	26.09	Muted
17846	469	128.79	Commd1
17857	1603	440.21	Mx1
17858	109	29.93	Mx2
17859	63	17.3	Mxi1
17868	29	7.96	Mybpc3
17872	177	48.61	Ppp1r15a
17873	22	6.04	Gadd45b
17874	250	68.65	Myd88
17876	10	2.75	Myef2
17886	88	24.17	Myh9
17896	5	1.37	Myl4
17909	54	14.83	Myo10
17910	1	0.27	Myo15
17912	22	6.04	Myo1b
17913	118	32.4	Myo1c
17916	16	4.39	Myo1f
17918	487	133.74	Myo5a
17920	3	0.82	Myo6
17925	169	46.41	Myo9b
17929	1	0.27	Myom1
17931	43	11.81	Ppp1r12a
17936	56	15.38	Nab1
17937	70	19.22	Nab2
17938	861	236.44	Naca
17939	124	34.05	Naga
17940	2	0.55	Naip1
17948	3	0.82	Naip2
17952	20	5.49	Naip6
17955	77	21.15	Nap1l4
17957	2	0.55	Napb
17965	38	10.44	Nbl1
17966	51	14.01	Nbr1
17969	2245	616.51	Ncf1
17970	2	0.55	Ncf2
17972	1025	281.48	Ncf4
17973	202	55.47	Nck1
17975	245	67.28	Ncl
17978	16	4.39	Ncoa2
17979	64	17.58	Ncoa3
17984	2	0.55	Ndn
17988	220	60.41	Ndrg1
17991	440	120.83	Ndufa2
17992	434	119.18	Ndufa4
17995	22	6.04	Ndufv1
17996	2	0.55	Neb
17997	111	30.48	Nedd1
17999	3	0.82	Nedd4
18000	272	74.69	2010-09-02
18002	577	158.45	Nedd8
18003	4	1.1	Nedd9
18005	2	0.55	Nek2
18007	11	3.02	Neo1
18008	1	0.27	Nes
18010	266	73.05	Neu1
18015	61	16.75	Nf1
18016	51	14.01	Nf2
18018	27	7.41	Nfatc1
18019	4	1.1	Nfatc2
18020	9	2.47	Nfatc2ip
18021	30	8.24	Nfatc3
18023	1036	284.5	Nfe2l1
18024	34	9.34	Nfe2l2
18027	3	0.82	Nfia
18028	3	0.82	Nfib
18029	75	20.6	Nfic
18032	11	3.02	Nfix
18033	1645	451.74	Nfkb1
18035	3531	969.66	Nfkbia
18036	312	85.68	Nfkbib
18037	752	206.51	Nfkbie
18038	15	4.12	Nfkbil1
18040	1	0.27	Nefm
18041	30	8.24	Nfs1
18044	206	56.57	Nfya
18045	98	26.91	Nfyb
18046	78	21.42	Nfyc
18049	4	1.1	Ngf
18073	4	1.1	Nid1
18080	27	7.41	Nin
18081	743	204.04	Ninj1
18082	6	1.65	Nipsnap1
18087	142	39	Nktr
18100	97	26.64	Mrpl40
18104	26	7.14	Nqo1
18105	28	7.69	Nqo2
18108	10	2.75	Nmt2
18114	123	33.78	Rrp1
18115	17	4.67	Nnt
18117	22	6.04	Cox4nb
18120	12	3.3	Mrpl49
18126	713	195.8	Nos2
18128	531	145.82	Notch1
18129	47	12.91	Notch2
18130	4	1.1	Ints6
18132	1	0.27	Notch4
18133	10	2.75	Nov
18139	247	67.83	Zfml
18140	18	4.94	Uhrf1
18141	101	27.74	Nup50
18145	539	148.02	Npc1
18146	7	1.92	Npdc1
18160	5	1.37	Npr1
18173	9	2.47	Slc11a1
18174	2458	675	Slc11a2
18175	1	0.27	Nrap
18176	306	84.03	Nras
18181	58	15.93	Nrf1
18186	82	22.52	Nrp1
18187	1306	358.64	Nrp2
18191	1	0.27	Nrxn3
18193	61	16.75	Nsd1
18194	22	6.04	Nsdhl
18195	22	6.04	Nsf
18196	1	0.27	Nsg1
18201	19	5.22	Nsmaf
18203	58	15.93	Ntan1
18214	16	4.39	Ddr2
18220	744	204.31	Nucb1
18222	4	1.1	Numb
18223	2	0.55	Numbl
18226	145	39.82	Nup62
18227	1	0.27	Nr4a2
18242	53	14.55	Oat
18293	33	9.06	Ogdh
18294	4	1.1	Ogg1
18301	17	4.67	Fxyd5
18302	13	3.57	Oit3
18354	1	0.27	Olfr54
18356	2	0.55	Olfr56
18383	3	0.82	Tnfrsf11b
18391	75	20.6	Sigmar1
18392	1	0.27	Orc1l
18393	13	3.57	Orc2l
18408	10	2.75	Slc25a15
18412	6652	1826.73	Sqstm1
18413	100	27.46	Osm
18414	6	1.65	Osmr
18415	3	0.82	Hspa4l
18430	1	0.27	Oxtr
18432	216	59.32	Mybbp1a
18436	5	1.37	P2rx1
18438	255	70.03	P2rx4
18439	63	17.3	P2rx7
18441	1	0.27	P2ry1
18442	409	112.32	P2ry2
18451	212	58.22	P4ha1
18452	21	5.77	P4ha2
18453	1609	441.85	P4hb
18457	65	17.85	Pldn
18472	373	102.43	Pafah1b1
18475	154	42.29	Pafah1b2
18476	9	2.47	Pafah1b3
18477	80	21.97	Prdx1
18479	64	17.58	Pak1
18483	46	12.63	Palm
18484	4	1.1	Pam
18515	70	19.22	Pbx2
18518	45	12.36	Igbp1
18519	25	6.87	Kat2b
18530	26	7.14	Pcdh8
18536	53	14.55	Pcm1
18537	81	22.24	Pcmt1
18541	10	2.75	Pcnt
18549	1	0.27	Pcsk2
18550	287	78.81	Furin
18554	23	6.32	Pcsk7
18555	43	11.81	Pctk1
18557	1	0.27	Pctk3
18559	14	3.84	Pctp
18563	1	0.27	Pcx
18567	6	1.65	Pdcd2
18570	550	151.04	Pdcd6
18571	99	27.19	Pdcd6ip
18572	10	2.75	Pdcd11
18574	226	62.06	Pde1b
18577	9	2.47	Pde4a
18582	40	10.98	Pde6d
18583	18	4.94	Pde7a
18590	7	1.92	Pdgfa
18591	48	13.18	Pdgfb
18596	20	5.49	Pdgfrb
18597	331	90.9	Pdha1
18602	5	1.37	Padi4
18605	22	6.04	Enpp1
18606	1	0.27	Enpp2
18607	234	64.26	Pdpk1
18611	135	37.07	Pea15a
18613	1	0.27	Pecam1
18618	5	1.37	Pemt
18619	93	25.54	Penk
18624	916	251.55	Pepd
18626	55	15.1	Per1
18627	10	2.75	Per2
18628	3	0.82	Per3
18632	28	7.69	Pex11b
18633	40	10.98	Pex16
18634	44	12.08	Pex7
18636	1112	305.37	Cfp
18637	80	21.97	Pfdn2
18640	35	9.61	Pfkfb2
18641	272	74.69	Pfkl
18642	2	0.55	Pfkm
18643	1994	547.58	Pfn1
18647	125	34.33	Pftk1
18648	1368	375.67	Pgam1
18654	1	0.27	Pgf
18669	24	6.59	Abcb1b
18670	1	0.27	Abcb4
18671	5	1.37	Abcb1a
18674	69	18.95	Slc25a3
18679	4	1.1	Phka1
18685	11	3.02	Phtf1
18689	1	0.27	Phxr4
18693	4	1.1	Pick1
18700	20	5.49	Piga
18701	8	2.2	Pigf
18704	94	25.81	Pik3c2a
18706	188	51.63	Pik3ca
18707	69	18.95	Pik3cd
18708	68	18.67	Pik3r1
18709	12	3.3	Pik3r2
18710	1	0.27	Pik3r3
18711	82	22.52	Pikfyve
18712	124	34.05	Pim1
18715	42	11.53	Pim2
18717	271	74.42	Pip5k1c
18718	99	27.19	Pip4k2a
18719	3	0.82	Pip5k1b
18720	29	7.96	Pip5k1a
18726	11	3.02	Pira3
18738	541	148.57	Pitpna
18739	8	2.2	Pitpnm1
18744	31	8.51	Pja1
18746	4	1.1	Pkm2
18747	52	14.28	Prkaca
18749	57	15.65	Prkacb
18750	10	2.75	Prkca
18751	85	23.34	Prkcb
18753	1671	458.88	Prkcd
18755	9	2.47	Prkch
18759	83	22.79	Prkci
18762	1	0.27	Prkcz
18763	17	4.67	Pkd1
18764	12	3.3	Pkd2
18767	1	0.27	Pkia
18769	132	36.25	Pkig
18770	1	0.27	Pklr
18771	25	6.87	Pknox1
18777	207	56.84	Lypla1
18779	4	1.1	Pla2r1
18782	1	0.27	Pla2g2d
18783	502	137.86	Pla2g4a
18786	118	32.4	Plaa
18787	890	244.41	Serpine1
18789	138	37.9	Papola
18791	4	1.1	Plat
18793	655	179.87	Plaur
18795	7	1.92	Plcb1
18796	1	0.27	Plcb2
18797	123	33.78	Plcb3
18799	5	1.37	Plcd1
18805	54	14.83	Pld1
18806	39	10.71	Pld2
18807	1567	430.32	Pld3
18810	457	125.5	Plec1
18813	111	30.48	Pa2g4
18817	8	2.2	Plk1
18822	107	29.38	Plod1
18826	548	150.49	Lcp1
18828	4	1.1	Plscr2
18830	221	60.69	Pltp
18844	431	118.36	Plxna1
18845	1	0.27	Plxna2
18846	1	0.27	Plxna3
18854	316	86.78	Pml
18858	825	226.56	Pmp22
18861	7	1.92	Pms2
18933	2	0.55	Prrx1
18938	2	0.55	Ppp1r14b
18949	55	15.1	Pnn
18950	3	0.82	Pnp1
18969	19	5.22	Pola2
18970	99	27.19	Polb
18971	11	3.02	Pold1
18972	3	0.82	Pold2
18974	2	0.55	Pole2
18975	11	3.02	Polg
18976	2	0.55	Pomc
18983	14	3.84	Cnot7
18984	1017	279.28	Por
18985	1	0.27	Pou2af1
18986	4	1.1	Pou2f1
18987	72	19.77	Pou2f2
19009	1	0.27	Pou6f1
19012	1	0.27	Ppap2a
19014	197	54.1	Med1
19015	34	9.34	Ppard
19016	19	5.22	Pparg
19018	108	29.66	Scand1
19024	41	11.26	Ppfibp2
19025	1261	346.29	Ctsa
19027	355	97.49	Sypl
19035	433	118.91	Ppib
19038	13	3.57	Ppic
19039	5858	1608.68	Lgals3bp
19042	31	8.51	Ppm1a
19043	17	4.67	Ppm1b
19044	36	9.89	Ppox
19045	642	176.3	Ppp1ca
19047	24	6.59	Ppp1cc
19052	255	70.03	Ppp2ca
19053	1	0.27	Ppp2cb
19054	177	48.61	Ppp2r3d
19055	28	7.69	Ppp3ca
19057	13	3.57	Ppp3cc
19058	755	207.33	Ppp3r1
19060	54	14.83	Ppp5c
19062	40	10.98	Inpp5k
19063	108	29.66	Ppt1
19069	86	23.62	Nup88
19070	234	64.26	Mobkl3
19072	72	19.77	Prep
19073	3672	1008.38	Srgn
19074	1	0.27	Prg2
19075	12	3.3	Prim1
19076	2	0.55	Prim2
19079	2	0.55	Prkab1
19082	3	0.82	Prkag1
19084	520	142.8	Prkar1a
19085	12	3.3	Prkar1b
19087	1	0.27	Prkar2a
19088	33	9.06	Prkar2b
19089	46	12.63	Prkcsh
19090	14	3.84	Prkdc
19094	4	1.1	Mapk11
19106	489	134.29	Eif2ak2
19108	90	24.72	Prkx
19118	1	0.27	Prm1
19122	62	17.03	Prnp
19124	13	3.57	Procr
19125	1	0.27	Prodh
19126	3	0.82	Prom1
19128	128	35.15	Pros1
19134	95	26.09	Prpf4b
19139	47	12.91	Prps1
19141	1051	288.62	Lgmn
19153	3	0.82	Prx
19155	112	30.76	Npepps
19156	6563	1802.29	Psap
19157	46	12.63	Cyth1
19158	368	101.06	Cyth2
19159	346	95.02	Cyth3
19164	83	22.79	Psen1
19165	68	18.67	Psen2
19166	1366	375.12	Psma2
19167	47	12.91	Psma3
19170	1217	334.2	Psmb1
19171	2995	822.47	Psmb10
19172	360	98.86	Psmb4
19175	616	169.16	Psmb6
19177	545	149.66	Psmb7
19179	7	1.92	Psmc1
19181	211	57.94	Psmc2
19182	123	33.78	Psmc3
19183	3	0.82	Psmc3ip
19184	290	79.64	Psmc5
19185	84	23.07	Psmd4
19186	6	1.65	Psme1
19188	2752	755.74	Psme2
19192	498	136.76	Psme3
19200	10	2.75	Pstpip1
19201	859	235.89	Pstpip2
19204	179	49.16	Ptafr
19205	53	14.55	Ptbp1
19208	4	1.1	Ptcra
19211	175	48.06	Pten
19216	5	1.37	Ptger1
19217	7	1.92	Ptger2
19219	22	6.04	Ptger4
19221	23	6.32	Ptgfrn
19222	20	5.49	Ptgir
19223	17	4.67	Ptgis
19224	29	7.96	Ptgs1
19225	1216	333.93	Ptgs2
19229	1078	296.03	Ptk2b
19230	145	39.82	Twf1
19243	172	47.23	Ptp4a1
19244	109	29.93	Ptp4a2
19245	10	2.75	Ptp4a3
19246	454	124.67	Ptpn1
19247	143	39.27	Ptpn11
19248	390	107.1	Ptpn12
19249	2	0.55	Ptpn13
19250	3	0.82	Ptpn14
19252	495	135.93	Dusp1
19253	33	9.06	Ptpn18
19255	303	83.21	Ptpn2
19258	3	0.82	Ptpn4
19260	2	0.55	Ptpn22
19262	323	88.7	Ptpra
19264	374	102.71	Ptprc
19265	6	1.65	Ptprcap
19267	2768	760.13	Ptpre
19268	1	0.27	Ptprf
19271	334	91.72	Ptprj
19272	1	0.27	Ptprk
19274	11	3.02	Ptprm
19275	3	0.82	Ptprn
19277	181	49.7	Ptpro
19280	54	14.83	Ptprs
19285	7	1.92	Ptrf
19286	142	39	Pts
19294	20	5.49	Pvrl2
19296	2	0.55	Pvt1
19298	54	14.83	Pex19
19299	66	18.12	Abcd3
19300	7	1.92	Abcd4
19302	2	0.55	Pxmp3
19303	3	0.82	Pxn
19305	42	11.53	Pex5
19309	2	0.55	Pygm
19317	831	228.2	Qk
19324	877	240.84	Rab1
19325	579	159	Rab10
19326	186	51.08	Rab11b
19330	332	91.17	Rab18
19331	1	0.27	Rab19
19332	4	1.1	Rab20
19334	158	43.39	Rab22a
19335	6	1.65	Rab23
19336	110	30.21	Rab24
19338	32	8.79	Rab33b
19340	22	6.04	Rab3d
19342	36	9.89	Rab4b
19345	708	194.43	Rab5c
19346	659	180.97	Rab6
19348	7	1.92	Kif20a
19349	56	15.38	Rab7
19352	9	2.47	Rabggtb
19353	1398	383.91	Rac1
19354	716	196.62	Rac2
19355	27	7.41	Rad1
19356	32	8.79	Rad17
[truncated: 9,103 more rows]
