# Supplementary material for: Deep-Sequencing Analysis of the Mouse Transcriptome Response to Infection with Brucella melitensis Strains of Differing Virulence
Source: PLoS One. 2011 Dec 28;6(12):e28485. doi: 10.1371/journal.pone.0028485 (PMC3247208; doi:10.1371/journal.pone.0028485)
Supplement: Table S6 — Validation of DGE data (2D-DIGE and qPCR). (XLSX) [file pone.0028485.s009.xlsx]

## Sheet: TOF-TOF
	MALDI-TOF/TOF spot identified report								Protein Table T-test and Av.Ratio:ontrol								DGE identified
Master No.	Rank protein name	protein score	protein scoreC.I.%	Total ion score	Total ion C.I.%	Pep.Accession No.count	protein MW	protein species PI	Master No.	T-test	m28/c	T-test	m90 /c	T-test	m90/m28	1-ANOVA	Symbol	Description	McvsM28	McvsM90	M28vsM90
236	Alb Serum albumin	125	100	114	100	4 IPI00131695	70700.5	5.75	236	0.31	1.82	0.023	4.44	0.13	2.44	0.0002	Alb	Serum albumin	Na	N	N
243	Alb Serum albumin	89	99.99	79	100	4 IPI00131695	70700.5	5.75	243	0.024	1.85	0.041	2.31	0.47	1.24	0.0024	Alb	Serum albumin	N	N	N
512	Hnrnpf Isoform 2 of Heterogeneous nuclear ribonucleoprotein F	481	100	337	100	17 IPI00226073	46043	5.31	512	0.052	-1.17	0.0047	-1.38	0.098	-1.18	0.0015	Hnrnpf	heterogeneous nuclear ribonucleoprotein F	-1.1252	-0.335887	0.789312
619	Ctsd Putative Uncharacterized protein	281	100	230	100	9 IPI00881091	45351.1	6.71	619	0.056	-1.32	0.009	-1.52	0.19	-1.15	0.0002	Ctsd	cathepsin D Putative uncharacterized protein	-1.49957	-1.90095	-0.401379
643	Ctsd Protein	206	100	172	100	6 IPI00927957	30333.2	6	643	0.052	-1.18	0.022	-1.22	0.61	-1.03	0.0017	Ctsd	cathepsin D	-1.49957	-1.90095	-0.401379
671	GM211 Putative Uncharacterized protein GM211	63	97.397			15 IPI00340215	83715.2	5.93	671	0.097	2.37	0.02	4.91	0.09	2.07	0.00012	GM211	GM211 Putative Uncharacterized protein	N	N	N
674	Alb Serum albumin	74	99.778	74	100	2 IPI00131695	70700.5	5.75	674	0.054	1.55	0.0091	2.74	0.09	1.77	1.4e-05	Alb	Serum albumin	N	N	N
773	Actg1 Actin, cytoplasmic 2	594	100	531	100	10 IPI00874482	42107.9	5.31	773	0.052	-1.32	0.015	-1.75	0.15	-1.32	0.00012	Actb	actin, beta	-0.418098	-0.347626	0.0704727
779	Krt1 Keratin, type II Cytoskeletal 1	121	100	74	100	12 IPI00625729	66078.5	8.39	779	0.056	-1.33	0.044	-1.43	0.46	-1.08	0.0025	Krt1	Keratin, type II Cytoskeletal 1	N	N	N
796	Capza1 F-actin-capping	489	100	366	100	14 IPI00877182	33104.4	5.34	796	0.3	1.13	0.0091	1.69	0.089	1.49	0.00031	Capza2	capping protein (actin filament) muscle Z-line, alpha 2	0.476656	0.486775	0.0101183
861	Eef1d 27 kDa protein	148	100	114	100	6 IPI00928390	27257.9	5.33	861	0.064	1.67	0.0091	2.95	0.089	1.77	1.6e-05	Eef1d	eukaryotic translation elongation factor 1 delta (guanine nucleotide exchange protein)	-0.481127	-0.311202	0.169925
1005	Apoe Apolipoprotein E	423	100	336	100	14 IPI00323571	35901.4	5.56	1005	0.42	-1.16	0.045	-1.46	0.15	-1.26	0.0049	Apoe	apolipoprotein E	-1.05494	-1.44162	-0.386686
1024	Ctsb Cathepsin B	354	100	284	100	10 IPI00113517	38168	5.57	1024	0.07	-1.59	0.021	-1.68	0.61	-1.06	0.00024	Ctsb	cathepsin B	-1.02129	1.1715	2.19279
1199	Ctss Cathepsin S	150	100	105	100	9 IPI00877231	39097.6	6.51	1199	0.049	-1.46	0.0047	-1.86	0.089	-1.27	9.9e-06	Ctss	cathepsin S	-0.931728	-1.52238	-0.590651
1316	Gpx1 Glutathione peroxidase 1	184	100	131	100	7 IPI00319652	22553.4	6.74	1316	0.51	1.23	0.047	1.85	0.19	1.5	0.0084	Gpx1	glutathione peroxidase 1	-1.2357	-1.09543	0.140271
1608	Fabp5 Fatty acid-binding protein,epidermal	95	99.998	63	99.995	5 IPI00114162	15469.5	6.14	1608	0.056	-1.59	0.029	-1.7	0.52	-1.07	0.0019	Fabp5	fatty acid binding protein 5, epidermal	-2.00901	-2.44724	-0.438227
1674	Alb Serum albumin	63	97.21	63	99.989	2 IPI00131695	70700.5	5.75	1674	0.3	2	0.023	6.34	0.09	3.17	0.00023	Alb	Serum albumin	N	N	N
a N represent the gene was not detected in DGE

## Sheet: qPCR
Targets	Sample Name	Normalized	TPM	Normalized Error	Pearson's correlation coefficient (r)
slco4a1	mc	1	0	0	0.99012
	m28	12.36	6.59	4.433
	m90	36.56	14.85	14.64
b3g	mc	1	3.21	0	0.993595
	m28	0.243	0.01	0.058
	m90	0.3917	0.27	0.1377
tmem	mc	1	14	0	0.999841
	m28	0.105	0.01	0.0306
	m90	0.0864	0.01	0.0345
slc46a3	mc	1	57	0	0.9943
	m28	0.0703	0.01	0.0158
	m90	0.1787	0.01	0.0631
inhba	mc	1	0	0	0.986365
	m28	166.7	21	41.53
	m90	288.5	29	105.8
ctsb	mc	1	6290.73	0	0.779958
	m28	0.8212	3099.29	0.9523
	m90	1.019	14169.6	1.05
hnrnpf	mc	1	146.17	0	0.835237
	m28	0.2165	67.01	0.0961
	m90	0.2817	115.81	0.0974
ctss	mc	1	9350.57	0	0.985656
	m28	0.7062	4901.85	0.2133
	m90	0.4917	3255.04	0.2099
ctsd	mc	1	6826.14	0	0.975837
	m28	0.6897	2414.13	0.2414
	m90	0.5381	1827.82	0.2951
capza2	mc	1	258.33	0	0.993193
	m28	3.532	359.47	1.463
	m90	3.267	362	2.433
eefld	mc	1	2.68	0	-0.970431
	m28	1.27	1.92	0.4614
	m90	1.127	2.16	0.4107
actb	mc	1	1893.72	0	0.8951
	m28	0.6726	1417.28	0.2711
	m90	0.5153	1488.23	0.1927
fabp5	mc	1	17.67	0	0.997924
	m28	0.2568	4.39	0.0511
	m90	0.2505	3.24	0.0687
apoe	mc	1	10984.1	0	0.994338
	m28	0.3949	5286.85	0.0371
	m90	0.3497	4043.83	0.0662
Mapk3	mc	1	143.22	0	0.971285
	m28	0.4029	68.1	0.0227
	m90	0.3154	26.72	0.0736
